# Supplementary material for: Productivity loss due to menstruation-related symptoms: a nationwide cross-sectional survey among 32 748 women
Source: PubMed Central journal article supplement — BMJ Open. 2019 Jun 27;9(6):e026186. doi: 10.1136/bmjopen-2018-026186 (PMC6597634; doi:10.1136/bmjopen-2018-026186), 2019-06-27
Supplement: bmjopen-2018-026186.draft_revisions.pdf [file bmjopen-2018-026186.draft_revisions.pdf]

# BMJ Open

BMJ Open is committed to open peer review. As part of this commitment we make the peer review history of every article we publish publicly available.

When an article is published we post the peer reviewers' comments and the authors' responses online. We also post the versions of the paper that were used during peer review. These are the versions that the peer review comments apply to.

The versions of the paper that follow are the versions that were submitted during the peer review process. They are not the versions of record or the final published versions. They should not be cited or distributed as the published version of this manuscript.

BMJ Open is an open access journal and the full, final, typeset and author-corrected version of record of the manuscript is available on our site with no access controls, subscription charges or pay-per-view fees (<http://bmjopen.bmj.com>).

If you have any questions on BMJ Open's open peer review process please email [info.bmjopen@bmj.com](mailto:info.bmjopen@bmj.com)

# BMJ Open

## Productivity loss due to menstruation-related symptoms: a nationwide cross-sectional survey among 32,748 women

|                               |                                                                                                                                                                                                                                                                                                                                                         |
|-------------------------------|---------------------------------------------------------------------------------------------------------------------------------------------------------------------------------------------------------------------------------------------------------------------------------------------------------------------------------------------------------|
| Journal:                      | <i>BMJ Open</i>                                                                                                                                                                                                                                                                                                                                         |
| Manuscript ID                 | bmjopen-2018-026186                                                                                                                                                                                                                                                                                                                                     |
| Article Type:                 | Research                                                                                                                                                                                                                                                                                                                                                |
| Date Submitted by the Author: | 22-Aug-2018                                                                                                                                                                                                                                                                                                                                             |
| Complete List of Authors:     | Schoep, Mark; Radboudumc, Obstetrics and Gynaecology<br>Adang, Eddy; Radboudumc, Health Evidence<br>Maas, Jacques; Maxima Medisch Centrum locatie Veldhoven<br>De Bie, Bianca; Dutch Patient Endometriosis Foundation<br>Aarts, Johanna; Radboudumc, Department of Obstetrics & Gynecology<br>Nieboer, Theodoor; Radboudumc, Obstetrics and Gynaecology |
| Keywords:                     | Menstruation, Community gynaecology < GYNAECOLOGY, Menstrual cycle, Presenteeism, Absenteeism                                                                                                                                                                                                                                                           |
|                               |                                                                                                                                                                                                                                                                                                                                                         |

SCHOLARONE™  
Manuscripts

Peer Review Only

1  
2  
3 **1 Productivity loss due to menstruation-related symptoms: a nationwide cross-**  
4 **2 sectional survey among 32,748 women**

5  
6  
7 **3 Schoep ME<sup>1</sup>, Adang EMM<sup>2</sup>, Maas JWM<sup>3</sup>, De Bie BLF<sup>4</sup>, Aarts JWM<sup>5</sup>, Nieboer TE<sup>6</sup>**

8  
9  
10  
11 **4 <sup>1</sup> Mark E Schoep, MD**

12  
13  
14 **5 Department of Obstetrics and Gynaecology, Radboud University Medical Centre,**

15  
16 **6 Nijmegen, The Netherlands**

17  
18  
19  
20  
21  
22 **8 <sup>2</sup> Eddy MM Adang, PhD**

23  
24  
25 **9 Department for Health Evidence, Radboud University Medical Centre, Nijmegen, The**

26  
27 **10 Netherlands**

28  
29  
30  
31  
32  
33 **12 <sup>3</sup> Jacques WM Maas, PhD**

34  
35  
36 **13 Department of Obstetrics and Gynaecology, Máxima Medical Centre, Veldhoven, The**

37  
38 **14 Netherlands**

39  
40  
41  
42  
43  
44 **16 <sup>4</sup> Bianca LF De Bie**

45  
46  
47 **17 Dutch Patient Endometriosis Foundation**

48  
49  
50  
51  
52  
53 **19 <sup>5</sup> Johanna WM Aarts, MD, PhD**

54  
55  
56 **20 Department of Obstetrics and Gynaecology, Radboud University Medical Centre,**

57  
58 **21 Nijmegen, The Netherlands**

1  
2  
3 22 <sup>6</sup> Theodoor E Nieboer, MD, PhD; Corresponding author  
4

5  
6 23 Department of Obstetrics and Gynaecology, Radboud University Medical Centre,  
7

8 24 Nijmegen, The Netherlands  
9

10  
11 25 Geert Grooteplein-Zuid 10, 6500 HB Nijmegen, The Netherlands  
12

13  
14 26 Telephone: +31(0)24-3614792  
15

16  
17 27 E-mail: [Bertho.Nieboer@radboudumc.nl](mailto:Bertho.Nieboer@radboudumc.nl)  
18

19 28  
20

21  
22 29 **Word count:** 3,612  
23

24  
25 30  
26

27  
28 31 **Key Words:** Absenteeism, Presenteeism, Menstrual cycle, Menstruation, Community  
29

30 32 Gynaecology  
31  
32  
33  
34  
35  
36  
37  
38  
39  
40  
41  
42  
43  
44  
45  
46  
47  
48  
49  
50  
51  
52  
53  
54  
55  
56  
57  
58  
59  
60

## 33 **Abstract**

### 34 Objective

35 To evaluate age-dependent productivity loss caused by menstruation-related  
36 symptoms, measured in absenteeism (time away from work or school) and  
37 presenteeism (productivity loss while present at work/school).

### 39 Methods

40 *Design/Setting:* Internet-based, cross-sectional survey conducted in The Netherlands  
41 from July to October 2017.

42 *Participants:* 32,748 women aged 15 to 45 years, recruited through social-media.

43 *Outcome measures:* Lost productivity in days, divided into absenteeism and  
44 presenteeism; impact of menstrual symptoms; reasons women give to their employer  
45 or school when calling in sick; and women's preferences regarding conditions at work  
46 and school.

### 48 Results

49 A total of 13.8% of all women reported absenteeism during their menstrual periods  
50 with 3.4% reporting absenteeism every or almost every menstrual cycle. The mean  
51 absenteeism related to a woman's period was 1.2 days per year. A total of 80.7% of  
52 the respondents reported presenteeism and decreased productivity a mean of 23.2  
53 days per year. An average productivity loss of 33% resulted in a mean of 8.9 days of  
54 total lost productivity per year. Women under 21 were more likely to report  
55 absenteeism due to menstruation-related symptoms (OR 3.3, 95% confidence  
56 interval 3.1 to 3.6). When women called in sick due to their periods, only 20.1% told

1  
2  
3 57 their employer or school mentor that their absence was due to menstrual complaints.  
4  
5 58 Notably, 67.7% of the participants wished they had greater flexibility in their tasks and  
6  
7 59 working hours at work or school during their periods.  
8  
9  
10  
11 60

## 12 13 61 Conclusions

14  
15 62 Menstruation-related symptoms cause a great deal of lost productivity, and  
16  
17 63 presenteeism is a bigger contributor to this than absenteeism. There is an urgent  
18  
19 64 need for more focus on the impact of these symptoms, especially in adolescents, for  
20  
21 65 discussions of treatment options with women of all ages, and, ideally, more flexibility  
22  
23 66 for women who work or go to school.  
24  
25  
26  
27 67

## 28 29 30 68 **Strengths and limitations of this study**

- 31  
32  
33 69 • This is the largest cohort study to analyse the impact of menstruation-related  
34  
35 70 symptoms on work and school productivity.  
36  
37 71 • The survey was performed among the general female population and is  
38  
39 72 consequently not per se related to one specific gynaecological condition.  
40  
41 73 • Due to the way of recruitment of participants, there may have been some  
42  
43 74 degree of selection bias.  
44  
45  
46 75 • The generalisability of the study may be limited to employment and school  
47  
48 76 systems comparable to the Dutch.  
49  
50  
51 77

## 78 **Background**

79 Menstruation-related symptoms (MRSs) are diverse and widespread among women.  
80 Symptoms include dysmenorrhea, heavy menstrual bleeding and premenstrual mood  
81 disturbances with reported prevalence of 45% to 90%, 14% to 25%, and 20% to 29%  
82 respectively.<sup>1-3</sup> Studies show that women with MRSs have lower scores on several  
83 domains of quality of life such as general health and physical, mental, social, and  
84 occupational functioning during their periods.<sup>1 4-7</sup> Furthermore, these symptoms may  
85 create considerable financial burdens on patients and their families as well as on  
86 society.<sup>5 6 8-12</sup> Such financial burdens are related to the costs of visits to the doctor,  
87 over-the-counter drugs, and medical or surgical treatment. However, costs related to  
88 productivity loss could be the largest cost driver. Productivity costs are defined as  
89 costs associated with paid and unpaid production loss and the replacement of  
90 productive people due to illness or disability.<sup>13</sup> Productivity costs can be divided into  
91 costs related to absenteeism and costs related to presenteeism. Absenteeism  
92 represents the total amount of time off work or away from school, and presenteeism  
93 represents the loss of productivity while present at a job or school.

94 Although the literature is scarce and the results are variable, studies on specific  
95 patient groups generally show that MRSs can cause absenteeism.<sup>14-16</sup> Research on  
96 the association between MRSs and presenteeism is even more limited. It has been  
97 suggested that research into possible impairments in quality of life caused by  
98 menstrual symptoms should not focus on single symptoms but rather on a complex of  
99 symptoms that vary widely but that are all related to the menstrual cycle. This  
100 complex includes both standard symptoms, like heavy menstrual bleeding and  
101 abdominal cramps, and also less common symptoms, like nausea and cold sweats.

102 17 18

1  
2  
3 103 Taking all symptoms into account, it seems likely that the real impact of MRSs is  
4  
5 104 underestimated in the general population. Despite being almost two decades into the  
6  
7 105 21<sup>st</sup> century, discussions about MRSs may still be rather taboo. This survey-based  
8  
9 106 exploratory study aimed to quantify the burden of MRSs in the general female  
10  
11 107 population, with burden defined as the number of lost days at work or school due to  
12  
13 108 absenteeism and presenteeism. Furthermore, it was aimed to study the impact of  
14  
15 109 specific symptoms on absenteeism and presenteeism.  
16  
17  
18  
19  
20  
21

## 111 **Methods**

22  
23  
24 112 This cross-sectional study consisted of an online survey that was distributed from  
25  
26 113 July 12 to October 11, 2017. Approval for this study was obtained from the local  
27  
28 114 medical ethics committee “Commissie Mensgebonden Onderzoek (CMO)” under  
29  
30 115 number file number 2017-3387 on July 12<sup>th</sup> 2017. All data were anonymously  
31  
32 116 collected and stored under the privacy rules of the Radboud University Medical  
33  
34 117 Center. Patients gave informed consent when they initiated the questionnaire.  
35  
36  
37  
38  
39  
40

## 41 *Patient and Public Involvement*

42  
43  
44 120 A group of women, including several members of the Dutch Patient Endometriosis  
45  
46 121 Foundation, was involved in the conduct of this study at several stages; i.e. in the  
47  
48 122 development and dissemination of the questionnaire and in the analysis and  
49  
50 123 interpretation of the results. One of the authors of this manuscript, BD, is the chair of  
51  
52 124 the Dutch Patient Endometriosis Foundation. Additional contributions are noted in the  
53  
54 125 Acknowledgements section.  
55  
56  
57  
58  
59  
60



1  
2  
3 127 *Questionnaire development*  
4  
5

6 128 The questionnaire had several parts, and Appendix 1 provides details about the  
7  
8 129 questions. Part 1 consisted of questions about each woman's basic characteristics.  
9  
10 130 Part 2 had questions about menstrual symptoms, and part 3 had questions related to  
11  
12 131 absenteeism and presenteeism. Adaptive questioning was used with a maximum of 6  
13  
14 132 questions per page. Additional questions about absenteeism and presenteeism were  
15  
16 133 included that were based on the Productivity Cost Questionnaire from the Institute for  
17  
18 134 Medical Technology Assessment (iMTA-PCQ).<sup>19</sup> We modified the iMTA-PCQ-  
19  
20 135 recommended recall period of four weeks so that it was in line with the relevant time  
21  
22 136 period for this study and so we could include multiple menstrual periods. Visual  
23  
24 137 analogue scales (VAS) were used to quantify the amount of pain, or the intensity of  
25  
26 138 the symptom, and the impairment due to pain or the other symptom. Presenteeism  
27  
28 139 was measured by asking women to what extent they were able to be as productive  
29  
30 140 as possible compared to a day without MRSs. This was scored on a scale from 0 to  
31  
32 141 10, with 0 being totally unproductive and 10 fully productive.  
33  
34  
35  
36  
37  
38  
39  
40

41  
42  
43  
44  
45  
46  
47  
48  
49  
50  
51  
52  
53  
54  
55  
56  
57  
58  
59  
60  
142  
143 *Target population and recruitment*

144 The study population comprised of women between 15 and 45 years old. The upper  
145 age limit was chosen to avoid interference from menopausal symptoms; the lower to  
146 have a time margin after the average menarche age, since it is known that the first  
147 periods are irregular and often accompanied with discomfort and uncertainty. A large  
148 number of women were approached with the aim of obtaining a cohort that was  
149 representative of the general female population in terms of level of education,  
150 medical history, and/or gynaecological diagnosis. Women were invited to complete a  
151 survey using an online questionnaire tool<sup>20</sup> through a campaign on social media

1  
2  
3 152 platforms Facebook and Twitter. Patient organisations, colleagues, and visitors of the  
4  
5 153 Facebook page of one of the authors (TN) were asked to share the link to the  
6  
7 154 questionnaire in order to reach the widest possible audience.  
8  
9

10 155 On July 12, 2017, a link to the questionnaire was posted on Facebook and Twitter  
11  
12 156 through the account of one of the authors (TN). In the post both women with and  
13  
14 157 without MRSs were encouraged to fill in the questionnaire. Within 24 hours of the first  
15  
16 158 posting on social media, over 6,000 respondents had filled in the questionnaire, and  
17  
18 159 by July 18, there were 15,000 respondents, which was announced by a re-post of the  
19  
20 160 link to the questionnaire. A third post was made on Facebook and Twitter on  
21  
22 161 September 16, 2017, to reach women who may have been on holiday when the first  
23  
24 162 posts were created.  
25  
26  
27  
28  
29  
30

### 31 164 *Data analysis*

32  
33  
34 165 The outcome measures were presented in a descriptive way; we used valid  
35  
36 166 percentages in case of missing values where necessary. We distinguished between  
37  
38 167 women who were mainly working or mainly studying. Therefore, we present these  
39  
40 168 data for two groups i.e. for women who worked more than 5 hours per week  
41  
42 169 (“working group”) and for women who studied more than 5 hours per week (“studying  
43  
44 170 group”).  
45  
46  
47

48 171 We used binary logistic regression to calculate odds ratios. Absenteeism and  
49  
50 172 presenteeism were used as dependant variables. As independent variables we used  
51  
52 173 the following parameters: women younger than 21 versus women aged 21 and older,  
53  
54 174 smoking yes or no, reports of absenteeism not related to MRSs, educational level,  
55  
56 175 the use of oral contraception and the use of an levonorgestrel-releasing intra uterine  
57  
58  
59  
60

1  
2  
3 176 device. All independent variables were used in an univariate as well as a multivariate  
4  
5 177 analysis. We also studied the association between pain scores and both  
6  
7 178 absenteeism and presenteeism, given that the literature shows that pain scores of 0  
8  
9 179 to 4, 5 to 6, and 7 or higher have a different impact on activity, mood, and sleep.<sup>21 22</sup>  
10  
11 180 Analyses were performed using IBM SPSS Statistics version 22.00.  
12  
13

14  
15 181

### 16 17 182 *Assumptions and transformation of the original data*

18  
19  
20 183 To present data on level of education in an international format we had to transform  
21  
22 184 the original data, which was based on the Dutch school system.<sup>23</sup>  
23  
24

25 185 With regard to the evaluation of absenteeism and presenteeism, “the guideline for  
26  
27 186 economic evaluations in healthcare in the Netherlands” was used.<sup>24</sup> A week of full  
28  
29 187 time work or study accounted for 36 hours, one day was 8 hours, and in a year,  
30  
31 188 women were able to work 1558 hours when they were working full time.  
32  
33

34  
35 189 To calculate the percentages for absenteeism, one day of absenteeism accounted for  
36  
37 190 8 hours of lost productivity. When a woman reported to study or work more than 40  
38  
39 191 hours per week, we transformed these hours to 40 hours. We made a few other  
40  
41 192 transformations for categorical data. For absenteeism related to MRSs, the category  
42  
43 193 “more than three days per cycle” was considered to be 4 days per cycle. For  
44  
45 194 absenteeism that was not related to MRSs, the category “more than ten days in the  
46  
47 195 past six months” was considered to be 11 days in the past six months.  
48  
49

50  
51 196 To present yearly data, we multiplied some of these data based on the original recall  
52  
53 197 period. The number of days for absenteeism related to MRSs was based on days per  
54  
55 198 cycle, which were therefore multiplied by 12.7 based on the reported average  
56  
57 199 menstrual cycle of 28.8 days, see table 1. These values were then multiplied by one  
58  
59

1  
2  
3 200 if the woman reported that she called in sick “every period”, 0.75 if she reported  
4  
5 201 “almost every period”, 0.5 if she reported “half of all periods”, and 0.25 if she reported  
6  
7 202 calling in sick “only once in a while”. Values for absenteeism that was not related to  
8  
9 203 MRS were based on a recall period of 6 months and were therefore multiplied by two  
10  
11 204 in order to obtain the number of days per year. The values for presenteeism were  
12  
13 205 based on a recall period of three months and were therefore multiplied by four.  
14  
15

16  
17 206

## 18 19 207 **Results**

20  
21  
22 208 A total of 44,173 women initiated the questionnaire. We excluded participants who  
23  
24 209 did not report a date of birth or whose age did not fulfil the inclusion criteria (figure 1).

25  
26 210 There were no duplicates of IP addresses. Women who did not answer questions  
27  
28 211 related to absenteeism and presenteeism were excluded. Furthermore, cases with  
29  
30 212 extreme outliers (e.g. 10,000,000 days of presenteeism in three months or 140  
31  
32 213 changes of sanitary pads a day) were excluded. This resulted in a total of 32,748  
33  
34 214 women in the final analysis.  
35  
36

37  
38 215 Table 1 summarizes the basic characteristics of the participants. We found that  
39  
40 216 45.4% (n=14,839) had visited a doctor for menstrual complaints in the past, with a  
41  
42 217 total of 3017 (9.2%) women reporting a diagnosis of a menstrual disorder, such as  
43  
44 218 endometriosis or fibroids.  
45  
46

47  
48 219 The mean age of women in the working group was higher than the mean age of  
49  
50 220 women in the studying group. The mean number of working hours per week in the  
51  
52 221 working group was 27.0 (SD 11.4), and the mean number of study hours in the  
53  
54 222 studying group was 27.4 (SD 12.1). A total of 7,335 women (22.4%) reported both  
55  
56 223 working and studying more than five hours per week. In this group, 3,001 women  
57  
58  
59  
60

224 were working more than 16 hours a week, and 5,284 women in the study group were  
 225 studying more than 16 hours a week.

|                                             | Number<br>(percentage) | Mean $\pm$ SD   | Median |
|---------------------------------------------|------------------------|-----------------|--------|
| <b>Age, years</b>                           |                        | 28.6 $\pm$ 8.6  | 28     |
| 15-19                                       | 6,141 (18.8%)          |                 |        |
| 20-24                                       | 6,118 (18.7%)          |                 |        |
| 25-29                                       | 5,825 (17.8%)          |                 |        |
| 30-34                                       | 5,483 (16.7%)          |                 |        |
| 35-40                                       | 4,687 (14.3%)          |                 |        |
| 41-45                                       | 4,494 (13.7%)          |                 |        |
| <b>Level of education</b>                   |                        |                 |        |
| Low                                         | 4,020 (12.3%)          |                 |        |
| Medium                                      | 12,335 (37.9%)         |                 |        |
| High                                        | 16,229 (49.8%)         |                 |        |
| <b>Hours/week</b>                           |                        |                 |        |
| Paid work                                   |                        | 21.7 $\pm$ 14.7 | 24     |
| Study                                       |                        | 7.4 $\pm$ 13.6  | 0      |
| Voluntary work                              |                        | 0.8 $\pm$ 3.1   | 0      |
| <b>Menstrual cycle</b>                      |                        |                 |        |
| Regular cycle                               | 25,717 (78.5%)         |                 |        |
| Duration                                    |                        | 28.8 $\pm$ 3.0  | 28     |
| Amenorrhoea due to LG-IUD/OC                | 3,675 (11.2%)          |                 |        |
| Irregular, variation >10 days per cycle     | 2,495 (7.6%)           |                 |        |
| Do not know                                 | 861 (2.6%)             |                 |        |
| Days with blood loss per cycle              |                        | 5.4 $\pm$ 1.6   | 5      |
| <b>Visited a doctor for MRSs</b>            |                        |                 |        |
| No                                          | 17,873 (54.6%)         |                 |        |
| Yes, general practitioner                   | 10,141 (31.0%)         |                 |        |
| Yes, gynaecologist                          | 4,698 (14.4%)          |                 |        |
| <b>Diagnosis for MRSs*</b>                  |                        |                 |        |
| No                                          | 29,731 (90.8%)         |                 |        |
| Yes                                         | 3,017 (9.2%)           |                 |        |
| Endometriosis                               | 1,120 (3.4%)           |                 |        |
| PCOS                                        | 588 (1.8%)             |                 |        |
| Adenomyosis                                 | 103 (0.3%)             |                 |        |
| Fibroids                                    | 275 (0.8%)             |                 |        |
| Other                                       | 1,901 (5.8%)           |                 |        |
| <b>Contraception*</b>                       |                        |                 |        |
| Hormonal contraception                      | 11,993 (36.6%)         |                 |        |
| OC                                          | 8,650 (26.4%)          |                 |        |
| LG-IUD                                      | 2,752 (8.4%)           |                 |        |
| Other hormonal: injection, transdermal etc. | 882 (2.7%)             |                 |        |
| No hormonal contraception                   | 20,755 (63.4%)         |                 |        |
| Cu-IUD                                      | 771 (2.4%)             |                 |        |
| Female sterilisation                        | 423 (1.3%)             |                 |        |
| No female contraception                     | 19,639 (60.0%)         |                 |        |
| <b>Nulliparous</b>                          | 21,585 (66.0%)         |                 |        |

|                                         |                |           |    |
|-----------------------------------------|----------------|-----------|----|
| <b><i>Paid work &gt;5 hr a week</i></b> | 26,104 (79.7%) |           |    |
| <b>Age</b>                              |                | 29.7±8.3  | 29 |
| <b>Hours of paid work/week</b>          |                | 27.0±11.4 | 28 |
| <b>Hours of study/week</b>              |                | 7.5±13.4  | 0  |
| <b><i>Study &gt;5 hr a week</i></b>     | 8,764 (26.8%)  |           |    |
| <b>Age</b>                              |                | 22.0±6.2  | 20 |
| <b>Hours of paid work/week</b>          |                | 15.5±11.3 | 12 |
| <b>Hours spent on studying/week</b>     |                | 27.4±12.1 | 30 |

226

227 Table 1 | Basic characteristics of study participants (n=32,748) Mean duration of  
 228 cycle based on women with a regular cycle. SD = standard deviation, MRSs =  
 229 menstruation-related symptoms, PCOS = polycystic ovary syndrome, OC = oral  
 230 contraceptive, LG-IUD = levonorgestrel-releasing intrauterine device, Cu-IUD =  
 231 copper intrauterine device. \*More than one possible answer.

232

### 233 *Absenteeism*

234 Table 2 shows the results on absenteeism due to MRSs. Although 13.8% of the  
 235 women (n=4,514) reported absenteeism due to MRSs, only 1,108 women (3.4%)  
 236 reported absenteeism every cycle or almost every cycle. The percentage of  
 237 absenteeism in every cycle or almost every cycle was 2.4% in the working group and  
 238 4.5% in the studying group. The mean absenteeism due to MRSs was 0.9 days per  
 239 year for the working group and 1.6 day per year for the study group.

240 We also calculated the mean total absenteeism that was not related to MRSs. For the  
 241 entire group, this was 3.3 days per year; for the working group, it was 3.5 days, and  
 242 for the studying group, it was 4.3 days. The mean percentage of absenteeism that  
 243 was not related to MRSs was 3.5% in the working group and 3.7% in the studying  
 244 group. Consequently, absenteeism due to MRSs in our cohort accounted for, on  
 245 average, 22% of the total absenteeism in the working group and 24% in the studying  
 246 group.

247

|                                           | Number<br>(percentage) | Mean $\pm$ SD |
|-------------------------------------------|------------------------|---------------|
| <b>All (n=32,748)</b>                     |                        |               |
| <b>Absenteeism</b>                        | 4,514 (13.8)           |               |
| <b><math>\leq 0.5</math> day</b>          | 538 (1.6%)             |               |
| <b>1 day</b>                              | 2,259 (6.9%)           |               |
| <b>2 days</b>                             | 1,171 (3.6%)           |               |
| <b>3 days</b>                             | 349 (1.1%)             |               |
| <b>&gt;3 days</b>                         | 184 (0.6%)             |               |
| <b>Total days of absenteeism per year</b> |                        | 1.3 $\pm$ 5.9 |
| <b>Work (n=26,104)</b>                    |                        |               |
| <b>Absenteeism</b>                        | 2,926 (11.2%)          |               |
| <b><math>\leq 0.5</math> day</b>          | 374 (1.4%)             |               |
| <b>1 day</b>                              | 1,476 (5.7%)           |               |
| <b>2 days</b>                             | 757 (2.9%)             |               |
| <b>3 days</b>                             | 211 (0.8%)             |               |
| <b>&gt;3 days</b>                         | 98 (0.4%)              |               |
| <b>Total days of absenteeism per year</b> |                        | 0.9 $\pm$ 3.9 |
| <b>Study (n=8,764)</b>                    |                        |               |
| <b>Absenteeism</b>                        | 1,715 (19.6%)          |               |
| <b><math>\leq 0.5</math> day</b>          | 234 (2.7%)             |               |
| <b>1 day</b>                              | 921 (10.5%)            |               |
| <b>2 days</b>                             | 423 (4.8%)             |               |
| <b>3 days</b>                             | 92 (1.0%)              |               |
| <b>&gt;3 days</b>                         | 41 (0.5%)              |               |
| <b>Total days of absenteeism per year</b> |                        | 1.6 $\pm$ 5.0 |

248

249 Table 2 | Reported absenteeism caused by menstruation-related symptoms. Women  
 250 were asked to report the amount of days on which they were absent due to  
 251 menstruation-related symptoms during the last 3 months. The total days of  
 252 absenteeism per year was calculated. The added numbers of women in the work and  
 253 study group exceed the total amount of participants, since 2,120 women reported to  
 254 both study and work more than 5 hours/week. SD = standard deviation

255

256 *Presenteeism*

257 Table 3 shows the numbers reported for presenteeism. Over 80% of all women  
 258 reported presenteeism during their periods. The differences between the working  
 259 group and the study group were not large in terms of prevalence and lost productivity.  
 260 The mean number of lost productive days per year due to presenteeism was more  
 261 than seven-fold greater than the mean number of lost productive days due to  
 262 absenteeism.

|                                                | Number<br>(percentage) | Mean $\pm$ SD   | Median |
|------------------------------------------------|------------------------|-----------------|--------|
| <b>All (n=32,748)</b>                          |                        |                 |        |
| <b>Presenteeism</b>                            | 26,438<br>(80.7%)      |                 |        |
| <b>Number of days in the past 3 months</b>     |                        | 5.8 $\pm$ 5.3   | 5.0    |
| <b>Percentage of productivity loss per day</b> |                        | 33.0 $\pm$ 24.8 | 30.0   |
| <b>Days/year of lost productivity</b>          |                        | 8.9 $\pm$ 11.0  | 5.6    |
| <b>Work (n=26,104)</b>                         |                        |                 |        |
| <b>Presenteeism</b>                            | 21,252<br>(81.4%)      |                 |        |
| <b>Number of days in the past 3 months</b>     |                        | 5.7 $\pm$ 5.2   | 5.0    |
| <b>Percentage of productivity loss per day</b> |                        | 31.7 $\pm$ 24.7 | 30.0   |
| <b>Days/year of lost productivity</b>          |                        | 8.4 $\pm$ 10.6  | 4.8    |
| <b>Study (n=8,764)</b>                         |                        |                 |        |
| <b>Presenteeism</b>                            | 7,385 (84.3%)          |                 |        |
| <b>Number of days in the past 3 months</b>     |                        | 6.3 $\pm$ 5.3   | 5.0    |
| <b>Percentage of productivity loss per day</b> |                        | 36.8 $\pm$ 24.2 | 40.0   |
| <b>Days/year of lost productivity</b>          |                        | 10.5 $\pm$ 11.8 | 7.2    |

263

264 Table 3 | Reported presenteeism caused by menstruation-related symptoms. Women  
 265 were asked to report the amount of days on which they were less productive and to  
 266 what extent. The total days of lost productivity per year was calculated. The added  
 267 numbers of women in the work and study group exceed the total amount of  
 268 participants, since 2,120 women reported to both study and work more than 5  
 269 hours/week. SD = standard deviation

270

### 271 *Factors associated with absenteeism and presenteeism*

272 Figure 2 shows the association between reported pain or discomfort scores and both  
 273 absenteeism and presenteeism. As seen in detail in table 4, high VAS scores were  
 274 significantly associated with higher levels of absenteeism and presenteeism. The  
 275 strongest relationship was found for abdominal pain scores that were 7 or higher on a  
 276 scale from 0 to ten. Odds ratios were 5.6 for absenteeism (95% confidence interval:  
 277 5.0 to 6.2) and 8.8 for presenteeism (95% confidence interval: 8.1 to 9.5). Figure 3  
 278 shows the association between age and both presenteeism and absenteeism. As  
 279 shown in both figure 3 and table 4, we found that younger women showed  
 280 significantly higher rates of absenteeism and presenteeism. A levonorgestrel-  
 281 releasing intrauterine device is associated with especially less presenteeism.



|                                                                           |        | Absenteeism   |                              | Presenteeism  |                              |
|---------------------------------------------------------------------------|--------|---------------|------------------------------|---------------|------------------------------|
|                                                                           |        | OR (95% CI)   | OR after correction (95% CI) | OR (95% CI)   | OR after correction (95% CI) |
| <b>Age&lt;21 years<sup>a</sup></b>                                        |        | 3.7 (3.4-3.9) | 3.3 (3.1-3.6)                | 1.4 (1.3-1.5) | 1.3 (1.2-1.4)                |
| <b>Smoking<sup>b</sup></b>                                                |        | 1.3 (1.2-1.5) | 1.3 (1.2-1.4)                | 1.5 (1.3-1.6) | 1.4 (1.3-1.6)                |
| <b>Absenteeism not related to MRSs in the past six months<sup>c</sup></b> |        | 2.2 (2.1-2.4) | 1.7 (1.6-1.9)                | 1.4 (1.3-1.5) | 1.3 (1.2-1.4)                |
| <b>Level of education<sup>d</sup></b>                                     |        |               |                              |               |                              |
|                                                                           | Low    | 4.5 (4.1-4.9) | 2.7 (2.4-3.0)                | 1.3 (1.2-1.4) | 1.1 (1.0-1.2)*               |
|                                                                           | Medium | 2.2 (2.1-2.4) | 1.7 (1.5-1.8)                | 1.3 (1.2-1.4) | 1.2 (1.1-1.2)                |
|                                                                           | High   | 1.0 (n/a)     | 1.0 (n/a)                    | 1.0 (n/a)     | 1.0 (n/a)                    |
| <b>Oral contraception<sup>e</sup></b>                                     |        |               |                              |               |                              |
|                                                                           | No     | 1.0 (n/a)     | 1.0 (n/a)                    | 1.0 (n/a)     | 1.0 (n/a)                    |
|                                                                           | Yes    | 1.2 (1.1-1.3) | 1.0 (0.9-1.1)**              | 0.9 (0.9-1.0) | 0.9 (0.8-0.9)                |
| <b>LG-IUD<sup>e</sup></b>                                                 |        |               |                              |               |                              |
|                                                                           | No     | 1.0 (n/a)     | 1.0 (n/a)                    | 1.0 (n/a)     | 1.0 (n/a)                    |
|                                                                           | Yes    | 0.7 (0.6-0.8) | 0.9 (0.8-1.0)                | 0.5 (0.5-0.6) | 0.5 (0.5-0.6)                |
| <b>Abdominal pain score<sup>e</sup></b>                                   |        |               |                              |               |                              |
|                                                                           | 0-4    | 1.0 (n/a)     | 1.0 (n/a)                    | 1.0 (n/a)     | 1.0 (n/a)                    |
|                                                                           | 5-6    | 2.6 (2.3-2.9) | 2.2 (1.9-2.4)                | 5.2 (4.8-5.7) | 5.3 (4.9-5.7)                |
|                                                                           | >7     | 7.0 (6.4-7.8) | 5.6 (5.0-6.2)                | 8.7 (8.0-9.4) | 8.8 (8.1-9.5)                |
| <b>Headache pain score<sup>e</sup></b>                                    |        |               |                              |               |                              |
|                                                                           | 0-4    | 1.0 (n/a)     | 1.0 (n/a)                    | 1.0 (n/a)     | 1.0 (n/a)                    |
|                                                                           | 5-6    | 1.5 (1.3-1.6) | 1.5 (1.4-1.6)                | 3.0 (2.7-3.3) | 3.1 (2.8-3.4)                |
|                                                                           | >7     | 2.0 (1.8-2.1) | 2.3 (2.1-2.5)                | 3.5 (3.2-3.9) | 3.7 (3.4-4.1)                |
| <b>Backache pain score<sup>e</sup></b>                                    |        |               |                              |               |                              |
|                                                                           | 0-4    | 1.0 (n/a)     | 1.0 (n/a)                    | 1.0 (n/a)     | 1.0 (n/a)                    |
|                                                                           | 5-6    | 1.6 (1.5-1.7) | 1.4 (1.3-1.5)                | 3.5 (3.2-3.9) | 3.5 (3.2-3.8)                |
|                                                                           | >7     | 2.7 (2.5-2.9) | 2.2 (2.1-2.4)                | 4.7 (4.2-5.2) | 4.5 (4.0-5.0)                |
| <b>Tiredness intensity score<sup>e</sup></b>                              |        |               |                              |               |                              |
|                                                                           | 0-4    | 1.0 (n/a)     | 1.0 (n/a)                    | 1.0 (n/a)     | 1.0 (n/a)                    |
|                                                                           | 5-6    | 1.8 (1.7-2.0) | 1.8 (1.6-2.0)                | 3.3 (3.1-3.6) | 3.3 (3.1-3.6)                |
|                                                                           | >7     | 3.0 (2.8-3.2) | 2.8 (2.6-3.1)                | 5.1 (4.7-5.6) | 5.2 (4.7-5.7)                |
| <b>Psychological complaints intensity score<sup>e</sup></b>               |        |               |                              |               |                              |
|                                                                           | 0-4    | 1.0 (n/a)     | 1.0 (n/a)                    | 1.0 (n/a)     | 1.0 (n/a)                    |
|                                                                           | 5-6    | 1.6 (1.5-1.7) | 1.5 (1.4-1.7)                | 2.7 (2.5-2.9) | 2.6 (2.5-2.9)                |
|                                                                           | >7     | 2.2 (2.0-2.4) | 2.1 (2.0-2.3)                | 4.4 (4.0-4.7) | 4.3 (4.0-4.7)                |

282

1  
2  
3 283 Table 4 | Odd ratios (ORs) and 95% confidence intervals (95% CIs) for factors  
4 284 related to absenteeism and presenteeism. ORs >1 correlate with more absenteeism  
5 285 or presenteeism. ORs <1 correlate with less absenteeism or presenteeism.  
6 286 LG-IUD = Levonorgestrel-releasing intra uterine device  
7  
8 287 <sup>a</sup>Correction for smoking and absenteeism that was not related to menstruation-  
9 288 related symptoms (MRSs); <sup>b</sup>Correction for age, absenteeism that was not related to  
10 289 MRSs, and level of education; <sup>c</sup>Correction for age, smoking, and level of education;  
11 290 <sup>d</sup>Correction for age, smoking, and absenteeism that was not related to MRSs;  
12 291 <sup>e</sup>Correction for age, smoking, absenteeism that was not related to MRSs, and level of  
13 292 education. \*p=0.26, \*\*p=0.73 For all other ORs, p<0.05  
14  
15  
16  
17  
18  
19  
20  
21  
22

#### 293 294 *Menstruation and suggested implications for schools and workplaces*

295 From the respondent who had been calling in sick due to MRSs, 20.1% (n=908) told  
296 their employer or school menstrual symptoms were the reason, 46.4% (n=2092) only  
297 mentioned the presenting symptom. No reason was given by 27.7% (n=1250), while  
298 5.8% (n=260) made up another reason. Women were asked to report suggestions on  
299 how work places and conditions could be changed in order for them to function better  
300 during their menstrual periods. There were 32,708 responses to this multiple-choice  
301 question, to which each woman could give more than one answer. The majority of  
302 women (67.7%, n=22,154) preferred more flexibility during their periods, such as the  
303 possibility of doing less physical work (32.1%, n=10,499), the ability to work from  
304 home (39.5%, n=12,917), more time for personal care (28.3%, n=9,241), or the ability  
305 to take a day off and make up for it later (11.5%, n=3,756). In addition, 32.9% wished  
306 they could take a complete day off without any consequences. 27.2% (n=8,890) did  
307 not wish for any changes in policy. Many women (79.7%, n=26,072) were open to  
308 discussing MRSs with their company doctor, and 56.7% (n=18,579) thought that  
309 doing so would draw more attention to MRS-related matters.

1  
2  
3 310 **Discussion**  
4  
5

6 311 This survey-based study showed that menstruation-related absenteeism and, to a  
7  
8 312 greater extent, presenteeism are widespread in the general female population. In our  
9  
10 313 cohort, MRSs accounted for up to 24% of total absenteeism for women who were  
11  
12 314 working and studying. The annual productivity loss due to presenteeism was seven-  
13  
14 315 fold times more than the annual productivity loss due to absenteeism and women  
15  
16 316 younger than 21 years experience the largest burden. Symptom severity scores  
17  
18 317 showed significant and strong associations with both absenteeism and presenteeism.  
19  
20 318 When women called in sick due to MRSs, only one in five stated openly that  
21  
22 319 menstrual symptoms were the main reason. A majority of women prefers more  
23  
24 320 flexibility during their periods when it comes to work or school.  
25  
26  
27

28 321 There have been few studies on absenteeism and presenteeism related to MRSs in  
29  
30 322 the general female population. To our knowledge, Tanaka's study <sup>25</sup> is the only other  
31  
32 323 published study on absenteeism and presenteeism due to MRSs in the general  
33  
34 324 female population. In a cohort of 19,254 Japanese women, a total of 3,311 (17.2%)  
35  
36 325 reported work productivity lost in the prior 3 months, mostly in the form of decreased  
37  
38 326 efficiency (62.0%, n=2,052). Of these 2,052 subjects, the mean number of workdays  
39  
40 327 lost due to decreased efficiency was 5.7 days in 3 months. After recalculation, this  
41  
42 328 accounts for 2.4 days per year for the entire population. This is fewer days than the  
43  
44 329 8.9 days per year in our cohort. On the other hand, the numbers for absenteeism  
45  
46 330 were more similar, with a mean of 1.0 day of absenteeism per year in the entire  
47  
48 331 Japanese cohort compared to 1.2 days in our cohort. Cultural diversity might explain  
49  
50 332 these differences, although it has been suggested in research on musculoskeletal  
51  
52 333 symptoms that rates of absenteeism might be lower in Japan compared to European  
53  
54  
55  
56  
57  
58  
59  
60

1  
2  
3 334 countries and the United States. Consequently, presenteeism might therefore be a  
4  
5 335 more representative variable.<sup>26 27</sup>  
6  
7

8 336 More data are available regarding the impact of dysmenorrhoea on quality of life and  
9  
10 337 absenteeism. De Sanctis et al. reviewed studies on dysmenorrhea in multiple  
11  
12 338 countries, some of which included menstruation-related absenteeism data. They  
13  
14 339 found that the prevalence of school absences in adolescents that was due to  
15  
16 340 dysmenorrhea varied between 7.7% and 57.8%. Since the review included 41,140  
17  
18 341 women in 27 countries, and there was a high degree of heterogeneity in the outcome  
19  
20 342 measures, no firm conclusions could be drawn. Hailemeskel et al. evaluated 440  
21  
22 343 female university students in Ethiopia.<sup>28</sup> Among students with dysmenorrhea, 66.8%  
23  
24 344 reported a loss of concentration in class, and 56.3% reported class absences during  
25  
26 345 the last month. In a questionnaire-based study of 706 Hispanic female adolescents,  
27  
28 346 38% reported missing school due to dysmenorrhea during the 3 months prior to the  
29  
30 347 survey, and 59% reported a decrease in concentration in class due to dysmenorrhea.  
31  
32 348 <sup>29</sup>  
33  
34  
35

36  
37 349 Absenteeism and presenteeism due to endometriosis in other studies was greater  
38  
39 350 than in our study, which was not surprising.<sup>9 14 30</sup> However, some interesting parallels  
40  
41 351 can be drawn to findings from a recent study by Soliman et al.<sup>14</sup> They found that the  
42  
43 352 average number of hours of presenteeism, 5.3 hours per week, was far greater than  
44  
45 353 the number of hours of absenteeism, which was 1.1 hours per week. Furthermore,  
46  
47 354 younger women had significantly higher levels of lost productivity than their older  
48  
49 355 counterparts, and more severe symptoms were associated with more absenteeism  
50  
51 356 and presenteeism.  
52  
53

54  
55 357 Our finding that only 20.1% of women were open about their menstrual symptoms as  
56  
57 358 a reason for calling in sick may confirm the general idea that women tend not to  
58  
59  
60

1  
2  
3 359 speak openly about MRSs. Wong et al. found that in a cohort of schoolgirls in  
4  
5 360 Malaysia, 76.1% considered dysmenorrhoea a normal part of the menstrual cycle.<sup>15</sup>  
6  
7 361 In the context of the findings noted above, our study also suggests there is a taboo  
8  
9 362 for women in terms of discussing menstrual problems with their employers. The latter  
10  
11 363 may therefore conclude that the impact of MRSs on their employees is negligible.  
12  
13 364 Considering the fact that we also found that 68% of women wish that they had  
14  
15 365 greater flexibility during their periods, either at school or at work, more openness  
16  
17 366 about MRSs in the employment setting seems desirable. The reasons underlying this  
18  
19 367 taboo are likely to have a historical basis; indeed, since ancient times, menstruation  
20  
21 368 has been surrounded with mythical stories and has not been well understood.  
22  
23 369 However, in recent years, the lay literature in developed countries has focused more  
24  
25 370 attention on MRSs.<sup>31-33</sup> The prevalence and the impact of MRSs on the general  
26  
27 371 population and the number of women who are asking for a different approach all  
28  
29 372 reflect the need to change the view of menstrual symptoms and the way they are  
30  
31 373 addressed in society.  
32  
33  
34  
35

36 374 This study consisted of a large cohort, and it reached a large number of women  
37  
38 375 within the age range that was aimed for. The questionnaire was developed in  
39  
40 376 collaboration with patient representatives to make it understandable by and relevant  
41  
42 377 to most women. The cohort appeared to be a representative sample of the general  
43  
44 378 female population based on the number of working hours.<sup>33</sup> When we compare our  
45  
46 379 data with the national registries the total amount of absenteeism is found to be  
47  
48 380 comparable, regardless of whether it was related to MRSs.<sup>34 35</sup> It is difficult to  
49  
50 381 compare our numbers on women with a diagnosis explaining their MRSs with  
51  
52 382 numbers found in other studies. We found that only 9% of the participants had such a  
53  
54 383 diagnosis, which seems about as expected or even somewhat low.<sup>3 36-38</sup> In contrast,  
55  
56 384 45% of the women in the study reported consulting a physician for their MRSs. This  
57  
58  
59

1  
2  
3 385 number was relatively high compared to other studies in which, for example, the  
4  
5 386 percentage of women with dysmenorrhoea who sought medical advice was  
6  
7 387 approximately 15%.<sup>15 16</sup> An important factor might be the Dutch health system in  
8  
9 388 which general practitioners are available free of charge. Women with a low level of  
10  
11 389 education were relatively underrepresented.<sup>39</sup> As our results show, especially  
12  
13 390 absenteeism related to MRSs is associated with a low level of education, and this  
14  
15 391 might have biased our results. We expect women with lower educational levels to do  
16  
17 392 more physical jobs or jobs with less flexibility. Therefore our findings on work  
18  
19 393 productivity loss might be underestimated. On the other hand, our finding could be  
20  
21 394 overestimated due to the possibility that women with more MRSs might be more  
22  
23 395 likely to respond to a questionnaire, as it may seem more relevant to them. Thus,  
24  
25 396 these results must be interpreted with caution. Due to the way that the questionnaire  
26  
27 397 was distributed through social media, there may have been some selection bias.  
28  
29 398 However, a recent review stated that Facebook is a useful recruitment tool for  
30  
31 399 healthcare research.<sup>40</sup> Although we did not use a validated questionnaire, our most  
32  
33 400 important outcomes were based on questions derived from the PCQ, which itself is  
34  
35 401 based on validated questions and which is recommended by guidelines for cost  
36  
37 402 research.<sup>24</sup> Self-reported absenteeism generally shows a good correlation with  
38  
39 403 official records, although accuracy decreases with increasing recall period.<sup>41</sup> This  
40  
41 404 might have initiated a recall bias in our cohort. It is unknown to what extent recall  
42  
43 405 bias affects reports on presenteeism.<sup>42</sup> In general, although results vary among  
44  
45 406 studies on premenstrual complaints, a prospective collection of data on symptoms is  
46  
47 407 advisable.<sup>43 44</sup> Finally, these results may not be generalized internationally due to  
48  
49 408 variability in the regulation of social services in different countries, and this is also a  
50  
51 409 limitation of our study. In The Netherlands, wages are paid during sick leave that has  
52  
53 410 duration of less than 1 year, but women in other countries may not have this benefit.  
54  
55  
56  
57  
58  
59  
60

1  
2  
3 411 Since we know that many factors influence menstrual symptoms, including biological,  
4  
5 412 cultural, and environmental factors, these differences might well influence both  
6  
7 413 absenteeism and presenteeism.<sup>6 14 45</sup>  
8  
9

10 414 In conclusion, we have found that the impact of MRSs on work and school  
11  
12 415 productivity is considerable and that presenteeism contributes significantly more to  
13  
14 416 the matter than absenteeism. Future research should identify how women affected by  
15  
16 417 MRSs could be helped best and how their productivity can be improved in order to  
17  
18 418 reduce the societal impact regarding absenteeism and presenteeism.  
19

20  
21  
22 419  
23  
24  
25  
26  
27  
28  
29  
30  
31  
32  
33  
34  
35  
36  
37  
38  
39  
40  
41  
42  
43  
44  
45  
46  
47  
48  
49  
50  
51  
52  
53  
54  
55  
56  
57  
58  
59  
60

420 **References**

- 421 1. Iacovides S, Avidon I, Baker FC. What we know about primary dysmenorrhea  
422 today: a critical review. *Hum Reprod Update* 2015;21(6):762-78. doi:  
423 10.1093/humupd/dmv039
- 424 2. Yonkers KA, Simoni MK. Premenstrual disorders. *Am J Obstet Gynecol*  
425 2018;218(1):68-74. doi: 10.1016/j.ajog.2017.05.045
- 426 3. Shapley M, Jordan K, Croft PR. An epidemiological survey of symptoms of  
427 menstrual loss in the community. *The British journal of general practice : the*  
428 *journal of the Royal College of General Practitioners* 2004;54(502):359-63.  
429 [published Online First: 2004/04/29]
- 430 4. Liu Z, Doan QV, Blumenthal P, et al. A systematic review evaluating health-related  
431 quality of life, work impairment, and health-care costs and utilization in  
432 abnormal uterine bleeding. *Value Health* 2007;10(3):183-94. doi:  
433 10.1111/j.1524-4733.2007.00168.x
- 434 5. Rapkin AJ, Winer SA. Premenstrual syndrome and premenstrual dysphoric  
435 disorder: quality of life and burden of illness. *Expert review of*  
436 *pharmacoeconomics & outcomes research* 2009;9(2):157-70. doi:  
437 10.1586/erp.09.14 [published Online First: 2009/05/01]
- 438 6. Knox B, Azurah AG, Grover SR. Quality of life and menstruation in adolescents.  
439 *Curr Opin Obstet Gynecol* 2015;27(5):309-14. doi:  
440 10.1097/GCO.000000000000199
- 441 7. Peuranpaa P, Heliövaara-Peippo S, Fraser I, et al. Effects of anemia and iron  
442 deficiency on quality of life in women with heavy menstrual bleeding. *Acta*  
443 *Obstet Gynecol Scand* 2014;93(7):654-60. doi: 10.1111/aogs.12394



- 1  
2  
3 444 8. Jensen JT, Lefebvre P, Laliberte F, et al. Cost burden and treatment patterns  
4  
5 445 associated with management of heavy menstrual bleeding. *J Womens Health*  
6  
7 446 (*Larchmt*) 2012;21(5):539-47. doi: 10.1089/jwh.2011.3147  
8  
9 447 9. Fourquet J, Baez L, Figueroa M, et al. Quantification of the impact of  
10  
11 448 endometriosis symptoms on health-related quality of life and work productivity.  
12  
13 449 *Fertil Steril* 2011;96(1):107-12. doi: 10.1016/j.fertnstert.2011.04.095  
14  
15 450 10. Klein S, D'Hooghe T, Meuleman C, et al. What is the societal burden of  
16  
17 451 endometriosis-associated symptoms? a prospective Belgian study. *Reprod*  
18  
19 452 *Biomed Online* 2014;28(1):116-24. doi: 10.1016/j.rbmo.2013.09.020  
20  
21  
22 453 11. Heinemann LA, Minh TD, Filonenko A, et al. Explorative evaluation of the impact  
23  
24 454 of severe premenstrual disorders on work absenteeism and productivity.  
25  
26 455 *Womens Health Issues* 2010;20(1):58-65. doi: 10.1016/j.whi.2009.09.005  
27  
28 456 [published Online First: 2010/02/04]  
29  
30  
31 457 12. Frick KD, Clark MA, Steinwachs DM, et al. Financial and quality-of-life burden of  
32  
33 458 dysfunctional uterine bleeding among women agreeing to obtain surgical  
34  
35 459 treatment. *Womens Health Issues* 2009;19(1):70-8. doi:  
36  
37 460 10.1016/j.whi.2008.07.002  
38  
39  
40 461 13. Krol M, Brouwer W, Rutten F. Productivity costs in economic evaluations: past,  
41  
42 462 present, future. *Pharmacoeconomics* 2013;31(7):537-49. doi: 10.1007/s40273-  
43  
44 463 013-0056-3  
45  
46 464 14. Soliman AM, Coyne KS, Gries KS, et al. The Effect of Endometriosis Symptoms  
47  
48 465 on Absenteeism and Presenteeism in the Workplace and at Home. *Journal of*  
49  
50 466 *managed care & specialty pharmacy* 2017;23(7):745-54. doi:  
51  
52 467 10.18553/jmcp.2017.23.7.745 [published Online First: 2017/06/27]  
53  
54  
55  
56  
57  
58  
59  
60

- 1  
2  
3 468 15. Wong LP. Attitudes towards dysmenorrhoea, impact and treatment seeking  
4  
5 469 among adolescent girls: a rural school-based survey. *Aust J Rural Health*  
6  
7 470 2011;19(4):218-23. doi: 10.1111/j.1440-1584.2011.01213.x  
8  
9 471 16. De Sanctis V, Soliman AT, Elsedfy H, et al. Dysmenorrhea in adolescents and  
10  
11 472 young adults: a review in different countries. *Acta bio-medica : Atenei*  
12  
13 473 *Parmensis* 2017;87(3):233-46. [published Online First: 2017/01/24]  
14  
15 474 17. Sharp BAC, Taylor DL, Thomas KK, et al. Cyclic Perimenstrual Pain and  
16  
17 Discomfort: The Scientific Basis for Practice. *Journal of Obstetric, Gynecologic*  
18 475  
19 & Neonatal Nursing 2002;31(6):637-49. doi: 10.1177/0884217502239207  
20 476  
21 477 18. Monagle L, Dan A, Krogh V, et al. Perimenstrual symptom prevalence rates: an  
22  
23 Italian-American comparison. *American journal of epidemiology*  
24 478  
25 1993;138(12):1070-81. [published Online First: 1993/12/15]  
26 479  
27 480 19. Bouwmans C, Krol M, Severens H, et al. The iMTA Productivity Cost  
28  
29 Questionnaire: A Standardized Instrument for Measuring and Valuing Health-  
30 481  
31 Related Productivity Losses. *Value Health* 2015;18(6):753-8. doi:  
32 482  
33 10.1016/j.jval.2015.05.009  
34 483  
35 484 20. SurveyMonkey. SurveyMonkey, software for online surveys 2018 [Available from:  
36  
37 <http://www.surveymonkey.net>.  
38 485  
39 486 21. Bodian CA, Freedman G, Hossain S, et al. The visual analog scale for pain:  
40  
41 clinical significance in postoperative patients. *Anesthesiology*  
42 487  
43 2001;95(6):1356-61. [published Online First: 2001/12/19]  
44 488  
45 489 22. Serlin RC, Mendoza TR, Nakamura Y, et al. When is cancer pain mild, moderate  
46  
47 or severe? Grading pain severity by its interference with function. *Pain*  
48 490  
49 1995;61(2):277-84. [published Online First: 1995/05/01]  
50 491  
51 492 23. UNESCO Institute for Statistics. International Standard Classification of  
52  
53 Education ISCED 2011, 2012.  
54 493  
55  
56  
57  
58  
59  
60

- 1  
2  
3 494 24. Dutch Healthcare Institution (Zorginstituut Nederland). Guideline for the execution  
4  
5 495 of economic evaluations in healthcare. (Richtlijn voor het uitvoeren van  
6  
7 496 economische evaluaties in de gezondheidszorg). 2016.  
8  
9 497 <https://www.zorginstituutnederland.nl/publicaties/publicatie/2016/02/29/richtlijn>  
10  
11 498 [-voor-het-uitvoeren-van-economische-evaluaties-in-de-gezondheidszorg](https://www.zorginstituutnederland.nl/publicaties/publicatie/2016/02/29/richtlijn-voor-het-uitvoeren-van-economische-evaluaties-in-de-gezondheidszorg).  
12  
13 499 25. Tanaka E, Momoeda M, Osuga Y, et al. Burden of menstrual symptoms in  
14  
15 500 Japanese women: results from a survey-based study. *Journal of medical*  
16  
17 501 *economics* 2013;16(11):1255-66. doi: 10.3111/13696998.2013.830974  
18  
19 502 [published Online First: 2013/09/11]  
20  
21  
22 503 26. Nakata K, Tsuji T, Vietri J, et al. Work impairment, osteoarthritis, and health-  
23  
24 504 related quality of life among employees in Japan. *Health and quality of life*  
25  
26 505 *outcomes* 2018;16(1):64. doi: 10.1186/s12955-018-0896-9 [published Online  
27  
28 506 First: 2018/04/19]  
29  
30  
31 507 27. Matsudaira K, Palmer KT, Reading I, et al. Prevalence and correlates of regional  
32  
33 508 pain and associated disability in Japanese workers. *Occupational and*  
34  
35 509 *environmental medicine* 2011;68(3):191-6. doi: 10.1136/oem.2009.053645  
36  
37 510 [published Online First: 2010/09/14]  
38  
39  
40 511 28. Hailemeskel S, Demissie A, Assefa N. Primary dysmenorrhea magnitude,  
41  
42 512 associated risk factors, and its effect on academic performance: evidence from  
43  
44 513 female university students in Ethiopia. *Int J Womens Health* 2016;8:489-96.  
45  
46 514 doi: 10.2147/ijwh.s112768 [published Online First: 2016/10/04]  
47  
48 515 29. Banikarim C, Chacko MR, Kelder SH. Prevalence and impact of dysmenorrhea  
49  
50 516 on Hispanic female adolescents. *Archives of pediatrics & adolescent medicine*  
51  
52 517 2000;154(12):1226-9. [published Online First: 2000/12/15]  
53  
54  
55  
56  
57  
58  
59  
60

- 1  
2  
3 518 30. Nnoaham KE, Hummelshoj L, Webster P, et al. Impact of endometriosis on  
4  
5 519 quality of life and work productivity: a multicenter study across ten countries.  
6  
7 520 *Fertil Steril* 2011;96(2):366-73 e8. doi: 10.1016/j.fertnstert.2011.05.090  
8  
9 521 31. George R. Bad blood: the taboo on talking about periods is damaging lives *The*  
10  
11 522 *Guardian* 2016  
12  
13 523 32. Aufrichtig A. Period pain: why do so many women suffer from menstrual cramps  
14  
15 524 in silence? . *The Guardian* 2016  
16  
17 525 33. Betts H. The P Word: A last taboo. *The Telegraph* 2013  
18  
19 526 34. Central Bureau of Statistics. Statline - Active workforce; duration of labour.  
20  
21 527 (Werkzame beroepsbevolking; arbeidsduur), 2018.  
22  
23 528 35. Central Bureau of Statistics. Statline - Sick leave according to employees; gender  
24  
25 529 and age. (Ziekteverzuim volgens werknemers; geslacht en leeftijd), 2017.  
26  
27 530 36. Robinson LL, Ismail KM. Clinical epidemiology of premenstrual disorder:  
28  
29 531 informing optimized patient outcomes. *Int J Womens Health* 2015;7:811-8. doi:  
30  
31 532 10.2147/IJWH.S48426  
32  
33 533 37. Giudice LC, Kao LC. Endometriosis. *The Lancet* 2004;364(9447):1789-99. doi:  
34  
35 534 10.1016/s0140-6736(04)17403-5  
36  
37 535 38. Central Bureau of Statistics. Statline - People attending the general practitioner;  
38  
39 536 diagnosis, age, gender. (Personen naar bij de huisarts bekende diagnose;  
40  
41 537 leeftijd, geslacht), 2016.  
42  
43 538 39. Central Bureau of Statistics. Statline - Social monitor, prosperity and weel-being in  
44  
45 539 the Dutch society. (Sociale Monitor, welvaart en welzijn in de Nederlandse  
46  
47 540 samenleving), 2018.  
48  
49 541 40. Whitaker C, Stevelink S, Fear N. The Use of Facebook in Recruiting Participants  
50  
51 542 for Health Research Purposes: A Systematic Review. *J Med Internet Res*  
52  
53 543 2017;19(8):e290. doi: 10.2196/jmir.7071  
54  
55  
56  
57  
58  
59  
60

- 1  
2  
3 544 41. Severens JL, Mulder J, Laheij RJ, et al. Precision and accuracy in measuring  
4  
5 545 absence from work as a basis for calculating productivity costs in The  
6  
7 546 Netherlands. *Social science & medicine* (1982) 2000;51(2):243-9. [published  
8  
9 547 Online First: 2000/06/01]
- 10  
11 548 42. Bouwmans C, De Jong K, Timman R, et al. Feasibility, reliability and validity of a  
12  
13 549 questionnaire on healthcare consumption and productivity loss in patients with  
14  
15 550 a psychiatric disorder (TiC-P). *BMC health services research* 2013;13:217.  
16  
17 551 doi: 10.1186/1472-6963-13-217 [published Online First: 2013/06/19]
- 18  
19  
20 552 43. Janda C, Kues JN, Andersson G, et al. A symptom diary to assess severe  
21  
22 553 premenstrual syndrome and premenstrual dysphoric disorder. *Women &*  
23  
24 554 *health* 2017;57(7):837-54. doi: 10.1080/03630242.2016.1206055 [published  
25  
26 555 Online First: 2016/06/30]
- 27  
28  
29 556 44. O'Brien PMS, Bäckström T, Brown C, et al. Towards a consensus on diagnostic  
30  
31 557 criteria, measurement and trial design of the premenstrual disorders: the  
32  
33 558 ISPMD Montreal consensus. *Archives of Women's Mental Health*  
34  
35 559 2011;14(1):13-21. doi: 10.1007/s00737-010-0201-3
- 36  
37 560 45. Lee AM, So-Kum Tang C, Chong C. A culturally sensitive study of premenstrual  
38  
39 561 and menstrual symptoms among Chinese women. *J Psychosom Obstet*  
40  
41 562 *Gynaecol* 2009;30(2):105-14. doi: 10.1080/01674820902789241

563

1  
2  
3 564 **Funding statement**  
4

5  
6 565 This research received no specific grant from any funding agency in the public,  
7  
8 566 commercial or not-for-profit sectors.  
9

10  
11 567

12  
13  
14 568 **Competing interest statement**  
15

16  
17 569 All authors have completed the ICMJE uniform disclosure form at  
18  
19 570 [www.icmje.org/coi\\_disclosure.pdf](http://www.icmje.org/coi_disclosure.pdf) and declare: no support from any organisation for  
20  
21 571 the submitted work; no financial relationships with any organisations that might have  
22  
23 572 an interest in the submitted work in the previous three years; no other relationships or  
24  
25 573 activities that could appear to have influenced the submitted work.  
26

27  
28 574  
29  
30

31 575 **Contributorship statement**  
32

33  
34 576 TN, BD and JA conceived the study. MS wrote the first and successive drafts of the  
35  
36 577 manuscript. MS, TN and EA modelled and analysed the data. TN, EA, JM, BD and  
37  
38 578 JA contributed to study conception and design. MS and TN collected the data. All  
39  
40 579 authors revised the manuscript for important intellectual content. MS and TN had full  
41  
42 580 access to the data and take responsibility for the integrity of the data and the  
43  
44 581 accuracy of the data analysis. TN is the guarantor.  
45  
46

47  
48 582  
49

50  
51 583 **Data sharing statement**  
52

53  
54 584 No additional data from this study are available from a repository. Data are available  
55  
56 585 on request from the corresponding author.  
57

1  
2  
3 586 **Acknowledgements**  
4

5  
6 587 The authors would like to thank Reinoud Oomen, Peter de Vroed, Steven Giesbers,  
7  
8 588 Elsbeth Teeling, Paula Kragten and Annemarie Haverkamp for their valuable  
9  
10 589 contributions in the development and dispersion of the questionnaire.  
11  
12

13 590  
14  
15  
16  
17  
18  
19  
20  
21  
22  
23  
24  
25  
26  
27  
28  
29  
30  
31  
32  
33  
34  
35  
36  
37  
38  
39  
40  
41  
42  
43  
44  
45  
46  
47  
48  
49  
50  
51  
52  
53  
54  
55  
56  
57  
58  
59  
60

For peer review only

1  
2  
3 591 **Legends to figures**  
4

5  
6 592  
7

8  
9 593 *Figure 1*

10  
11 594 Flow chart for the respondents.  
12  
13

14  
15 595  
16

17 596 *Figure 2*

18  
19  
20 597 The relationship between pain and intensity scores, related to absenteeism and  
21  
22 598 presenteeism, in lost days per year.  
23  
24

25  
26 599  
27

28 600 *Figure 3*

29  
30  
31 601 The relationship between age and average absenteeism and presenteeism.  
32  
33  
34  
35  
36  
37  
38  
39  
40  
41  
42  
43  
44  
45  
46  
47  
48  
49  
50  
51  
52  
53  
54  
55  
56  
57  
58  
59  
60



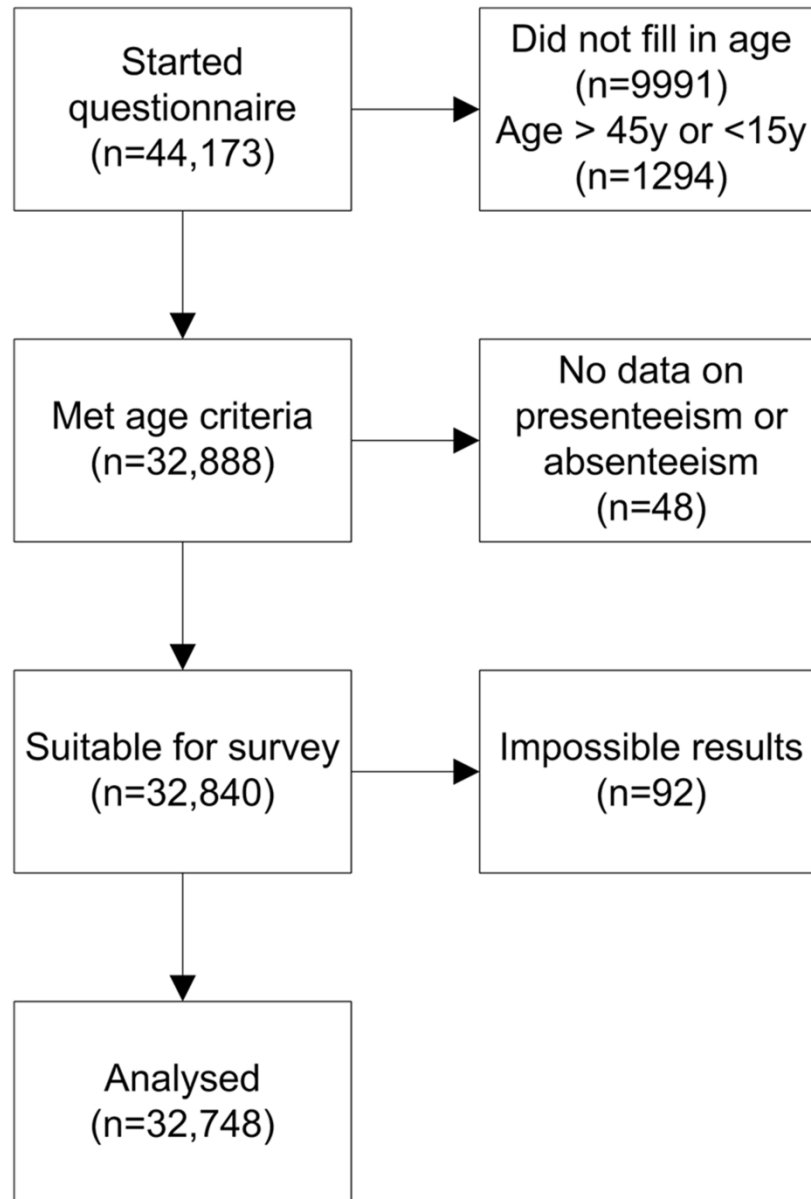

Flow chart for the respondents.

287x423mm (300 x 300 DPI)

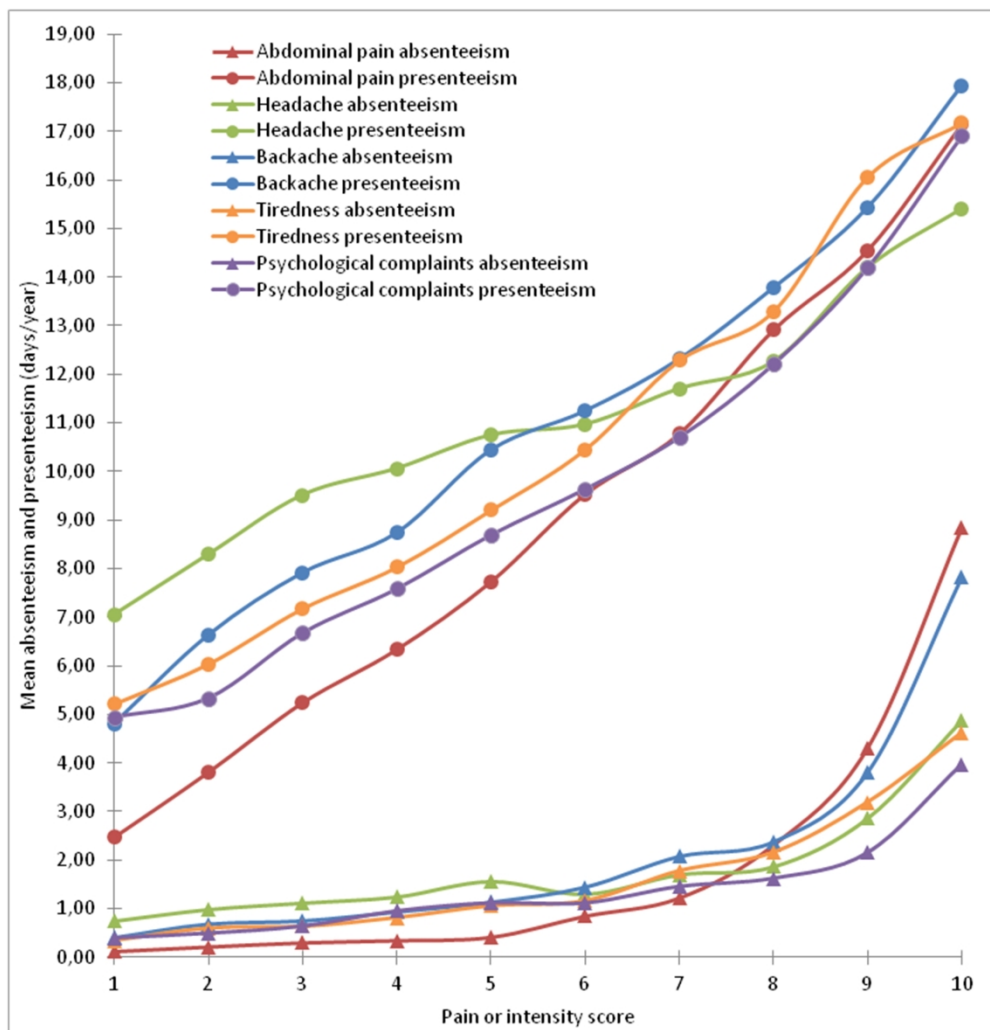

The relationship between pain and intensity scores, related to absenteeism and presenteeism, in lost days per year.

202x209mm (300 x 300 DPI)

1  
2  
3  
4  
5  
6  
7  
8  
9  
10  
11  
12  
13  
14  
15  
16  
17  
18  
19  
20  
21  
22  
23  
24  
25  
26  
27  
28  
29  
30  
31  
32  
33  
34  
35  
36  
37  
38  
39  
40  
41  
42  
43  
44  
45  
46  
47  
48  
49  
50  
51  
52  
53  
54  
55  
56  
57  
58  
59  
60

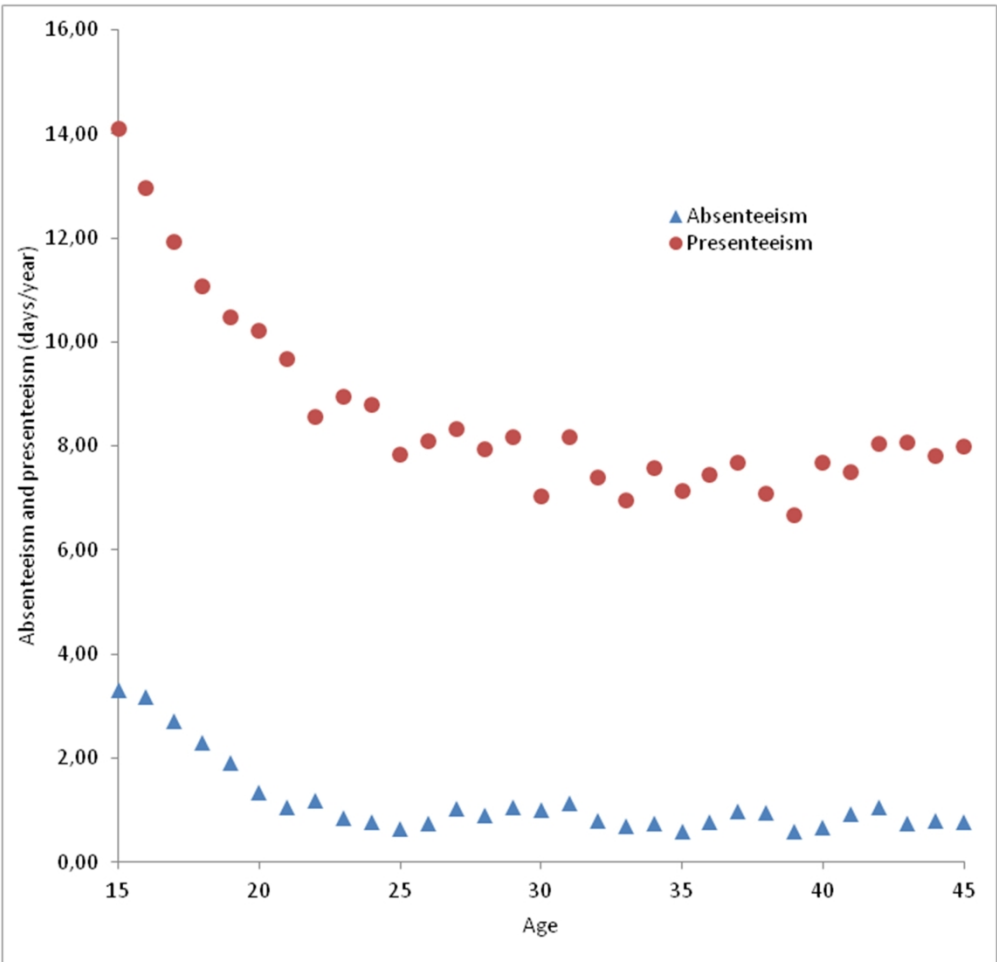

The relationship between age and average absenteeism and presenteeism.

206x199mm (300 x 300 DPI)

## Appendix

### Summary of the questionnaire

#### *Part 1: Questions about basic characteristics*

- Age, marital status, nationality, level of education
- Work, voluntary work and study: hours per week, sector,
- Smoking, stress
- Menstrual cycle: length, number of days with blood loss, number of times needing to change pad or tampon
- Medical and obstetric history
- Contraception use

#### *Part 2: General questions about menstruation-related symptoms*

- Symptoms: abdominal pain, heavy menstrual blood loss, headache, fatigue, backache, nausea and vomiting, tender breasts, problems with stool, psychological complaints
- Symptoms: number of days the symptom was present; number of days that the symptom influenced daily functioning; the magnitude of the symptom's influence on daily functioning; pain or intensity score (not for heavy menstrual bleeding, nausea and vomiting); continuation of daily activities despite symptoms; and the extent to which women forced themselves to continue their daily activities.
- Usage of over-the-counter drugs, narcotics, painkillers, alternative medicine

1  
2  
3 *Part 3: Questions related to absenteeism and presenteeism*  
4

- 5
- 6 - Number of days of absenteeism due to menstruation-related symptoms
  - 7
  - 8 - Number of days of presenteeism due to menstruation-related symptoms
  - 9
  - 10 - Mean amount of productivity loss due to menstruation-related symptoms during
  - 11 these days
  - 12
  - 13
  - 14
  - 15 - Number of days of absenteeism not related to menstruation-related symptoms
  - 16
  - 17 - Reasons given for absenteeism due to menstruation-related symptoms
  - 18
  - 19 - Suggestions for changes at the workplace or schools in order to function better
  - 20 during menstrual periods
  - 21
  - 22
  - 23
  - 24
  - 25
  - 26
  - 27
  - 28
  - 29
  - 30
  - 31
  - 32
  - 33
  - 34
  - 35
  - 36
  - 37
  - 38
  - 39
  - 40
  - 41
  - 42
  - 43
  - 44
  - 45
  - 46
  - 47
  - 48
  - 49
  - 50
  - 51
  - 52
  - 53
  - 54
  - 55
  - 56
  - 57
  - 58
  - 59
  - 60

**STROBE 2007 (v4) Statement—Checklist of items that should be included in reports of *cross-sectional studies***

| Section/Topic                | Item # | Recommendation                                                                                                                                                                       | Reported on page # |
|------------------------------|--------|--------------------------------------------------------------------------------------------------------------------------------------------------------------------------------------|--------------------|
| Title and abstract           | 1      | (a) Indicate the study's design with a commonly used term in the title or the abstract                                                                                               | 2                  |
|                              |        | (b) Provide in the abstract an informative and balanced summary of what was done and what was found                                                                                  | 2                  |
| <b>Introduction</b>          |        |                                                                                                                                                                                      |                    |
| Background/rationale         | 2      | Explain the scientific background and rationale for the investigation being reported                                                                                                 | 4                  |
| Objectives                   | 3      | State specific objectives, including any prespecified hypotheses                                                                                                                     | 5                  |
| <b>Methods</b>               |        |                                                                                                                                                                                      |                    |
| Study design                 | 4      | Present key elements of study design early in the paper                                                                                                                              | 5                  |
| Setting                      | 5      | Describe the setting, locations, and relevant dates, including periods of recruitment, exposure, follow-up, and data collection                                                      | 5-7                |
| Participants                 | 6      | (a) Give the eligibility criteria, and the sources and methods of selection of participants                                                                                          | 6                  |
| Variables                    | 7      | Clearly define all outcomes, exposures, predictors, potential confounders, and effect modifiers. Give diagnostic criteria, if applicable                                             | 8, appendix        |
| Data sources/<br>measurement | 8*     | For each variable of interest, give sources of data and details of methods of assessment (measurement). Describe comparability of assessment methods if there is more than one group | 7-8                |
| Bias                         | 9      | Describe any efforts to address potential sources of bias                                                                                                                            | 7-9                |
| Study size                   | 10     | Explain how the study size was arrived at                                                                                                                                            | 7                  |
| Quantitative variables       | 11     | Explain how quantitative variables were handled in the analyses. If applicable, describe which groupings were chosen and why                                                         | 7-9                |
| Statistical methods          | 12     | (a) Describe all statistical methods, including those used to control for confounding                                                                                                | 7-8                |
|                              |        | (b) Describe any methods used to examine subgroups and interactions                                                                                                                  | 7-8                |
|                              |        | (c) Explain how missing data were addressed                                                                                                                                          | 7,9                |
|                              |        | (d) If applicable, describe analytical methods taking account of sampling strategy                                                                                                   | n/a                |
|                              |        | (e) Describe any sensitivity analyses                                                                                                                                                | n/a                |
| <b>Results</b>               |        |                                                                                                                                                                                      |                    |

|                          |     |                                                                                                                                                                                                              |                                             |
|--------------------------|-----|--------------------------------------------------------------------------------------------------------------------------------------------------------------------------------------------------------------|---------------------------------------------|
| Participants             | 13* | (a) Report numbers of individuals at each stage of study—eg numbers potentially eligible, examined for eligibility, confirmed eligible, included in the study, completing follow-up, and analysed            | 9                                           |
|                          |     | (b) Give reasons for non-participation at each stage                                                                                                                                                         | 9/Figure 1                                  |
|                          |     | (c) Consider use of a flow diagram                                                                                                                                                                           | Figure 1                                    |
| Descriptive data         | 14* | (a) Give characteristics of study participants (eg demographic, clinical, social) and information on exposures and potential confounders                                                                     | 9/Table 1                                   |
|                          |     | (b) Indicate number of participants with missing data for each variable of interest                                                                                                                          | Not reported, can be reported if desirable. |
| Outcome data             | 15* | Report numbers of outcome events or summary measures                                                                                                                                                         | 9-11/Table 2,3                              |
| Main results             | 16  | (a) Give unadjusted estimates and, if applicable, confounder-adjusted estimates and their precision (eg, 95% confidence interval). Make clear which confounders were adjusted for and why they were included | Table 4                                     |
|                          |     | (b) Report category boundaries when continuous variables were categorized                                                                                                                                    | Table 1,4                                   |
|                          |     | (c) If relevant, consider translating estimates of relative risk into absolute risk for a meaningful time period                                                                                             | n/a                                         |
| Other analyses           | 17  | Report other analyses done—eg analyses of subgroups and interactions, and sensitivity analyses                                                                                                               | n/a                                         |
| <b>Discussion</b>        |     |                                                                                                                                                                                                              |                                             |
| Key results              | 18  | Summarise key results with reference to study objectives                                                                                                                                                     | 11-12                                       |
| Limitations              | 19  | Discuss limitations of the study, taking into account sources of potential bias or imprecision. Discuss both direction and magnitude of any potential bias                                                   | 14-15                                       |
| Interpretation           | 20  | Give a cautious overall interpretation of results considering objectives, limitations, multiplicity of analyses, results from similar studies, and other relevant evidence                                   | 12-15                                       |
| Generalisability         | 21  | Discuss the generalisability (external validity) of the study results                                                                                                                                        | 14-15                                       |
| <b>Other information</b> |     |                                                                                                                                                                                                              |                                             |
| Funding                  | 22  | Give the source of funding and the role of the funders for the present study and, if applicable, for the original study on which the present article is based                                                | n/a                                         |

\*Give information separately for cases and controls in case-control studies and, if applicable, for exposed and unexposed groups in cohort and cross-sectional studies.

**Note:** An Explanation and Elaboration article discusses each checklist item and gives methodological background and published examples of transparent reporting. The STROBE checklist is best used in conjunction with this article (freely available on the Web sites of PLoS Medicine at <http://www.plosmedicine.org/>, Annals of Internal Medicine at <http://www.annals.org/>, and Epidemiology at <http://www.epidem.com/>). Information on the STROBE Initiative is available at [www.strobe-statement.org](http://www.strobe-statement.org).

# BMJ Open

## Productivity loss due to menstruation-related symptoms: a nationwide cross-sectional survey among 32,748 women

|                                 |                                                                                                                                                                                                                                                                                                                                                          |
|---------------------------------|----------------------------------------------------------------------------------------------------------------------------------------------------------------------------------------------------------------------------------------------------------------------------------------------------------------------------------------------------------|
| Journal:                        | <i>BMJ Open</i>                                                                                                                                                                                                                                                                                                                                          |
| Manuscript ID                   | bmjopen-2018-026186.R1                                                                                                                                                                                                                                                                                                                                   |
| Article Type:                   | Research                                                                                                                                                                                                                                                                                                                                                 |
| Date Submitted by the Author:   | 13-Dec-2018                                                                                                                                                                                                                                                                                                                                              |
| Complete List of Authors:       | Schoep, Mark; Radboudumc, Obstetrics and Gynaecology<br>Adang, Eddy; Radboudumc, Health Evidence<br>Maas, Jacques; Maxima Medisch Centrum locatie Veldhoven<br>De Bie, Bianca; Dutch Patient Endometriosis Foundation<br>Aarts, Johanna; Radboudumc, Department of Obstetrics & Gynaecology<br>Nieboer, Theodoor; Radboudumc, Obstetrics and Gynaecology |
| <b>Primary Subject Heading</b>: | Obstetrics and gynaecology                                                                                                                                                                                                                                                                                                                               |
| Secondary Subject Heading:      | Health economics, Health policy, Occupational and environmental medicine, Public health                                                                                                                                                                                                                                                                  |
| Keywords:                       | Menstruation, Community gynaecology < GYNAECOLOGY, Menstrual cycle, Presenteeism, Absenteeism                                                                                                                                                                                                                                                            |
|                                 |                                                                                                                                                                                                                                                                                                                                                          |

SCHOLARONE™  
Manuscripts



1  
2  
3 1 **Productivity loss due to menstruation-related symptoms: a nationwide cross-**  
4  
5 2 **sectional survey among 32,748 women**  
6  
7

8 3 **Schoep ME<sup>1</sup>, Adang EMM<sup>2</sup>, Maas JWM<sup>3</sup>, De Bie BLF<sup>4</sup>, Aarts JWM<sup>5</sup>, Nieboer TE<sup>6</sup>**  
9

10  
11 4 1 Mark E Schoep, MD  
12

13  
14 5 Department of Obstetrics and Gynaecology, Radboud University Medical Centre,  
15

16  
17 6 Nijmegen, The Netherlands  
18  
19

20  
21 7  
22

23 8 2 Eddy MM Adang, PhD  
24

25  
26 9 Department for Health Evidence, Radboud University Medical Centre, Nijmegen, The  
27

28  
29 10 Netherlands  
30  
31

32  
33 11  
34

35 12 3 Jacques WM Maas, MD, PhD  
36

37  
38 13 Department of Obstetrics and Gynaecology, Máxima Medical Centre, Veldhoven, The  
39

40  
41 14 Netherlands  
42  
43

44  
45 15  
46

47 16 4 Bianca LF De Bie  
48

49  
50 17 Dutch Patient Endometriosis Foundation  
51

52  
53 18  
54

55  
56 19 5 Johanna WM Aarts, MD, PhD  
57

58  
59 20 Department of Obstetrics and Gynaecology, Radboud University Medical Centre,  
60

21 Nijmegen, The Netherlands

1  
2  
3 22 <sup>6</sup> Theodoor E Nieboer, MD, PhD; Corresponding author  
4  
5

6 23 Department of Obstetrics and Gynaecology, Radboud University Medical Centre,  
7

8 24 Nijmegen, The Netherlands  
9

10  
11 25 Geert Grooteplein-Zuid 10, 6500 HB Nijmegen, The Netherlands  
12

13  
14 26 Telephone: +31(0)24-3614792  
15

16  
17 27 E-mail: [Bertho.Nieboer@radboudumc.nl](mailto:Bertho.Nieboer@radboudumc.nl)  
18  
19

20 28  
21

22  
23 29 **Word count:** 4,056  
24

25  
26 30  
27

28  
29 31 **Key Words:** Absenteeism, Presenteeism, Menstrual cycle, Menstruation, Community  
30

31 32 Gynaecology  
32  
33  
34  
35  
36  
37  
38  
39  
40  
41  
42  
43  
44  
45  
46  
47  
48  
49  
50  
51  
52  
53  
54  
55  
56  
57  
58  
59  
60

## 33 **Abstract**

### 34 Objective

35 To evaluate age-dependent productivity loss caused by menstruation-related  
36 symptoms, measured in absenteeism (time away from work or school) and  
37 presenteeism (productivity loss while present at work/school).

38

### 39 Methods

40 *Design/Setting:* Internet-based, cross-sectional survey conducted in The Netherlands  
41 from July to October 2017.

42 *Participants:* 32,748 women aged 15 to 45 years, recruited through social-media.

43 *Outcome measures:* Lost productivity in days, divided into absenteeism and  
44 presenteeism; impact of menstrual symptoms; reasons women give to their employer  
45 or school when calling in sick; and women's preferences regarding the implications of  
46 menstruation related symptoms for schools and workplaces.

### 47 Results

48 A total of 13.8% of all women reported absenteeism during their menstrual periods  
49 with 3.4% reporting absenteeism every or almost every menstrual cycle. The mean  
50 absenteeism related to a woman's period was 1.2 days per year. A total of 80.7% of  
51 the respondents reported presenteeism and decreased productivity a mean of 23.2  
52 days per year. An average productivity loss of 33% resulted in a mean of 8.9 days of  
53 total lost productivity per year. Women under 21 were more likely to report  
54 absenteeism due to menstruation-related symptoms (OR 3.3, 95% confidence  
55 interval 3.1 to 3.6). When women called in sick due to their periods, only 20.1% told  
56 their employer or school mentor that their absence was due to menstrual complaints.

1  
2  
3 57 Notably, 67.7% of the participants wished they had greater flexibility in their tasks and  
4  
5 58 working hours at work or school during their periods.  
6  
7  
8  
9 59

## 10 11 60 Conclusions

12  
13  
14 61 Menstruation-related symptoms cause a great deal of lost productivity, and  
15  
16 62 presenteeism is a bigger contributor to this than absenteeism. There is an urgent  
17  
18 63 need for more focus on the impact of these symptoms, especially in adolescents, for  
19  
20 64 discussions of treatment options with women of all ages, and, ideally, more flexibility  
21  
22 65 for women who work or go to school.  
23  
24  
25  
26 66

## 27 28 29 67 **Strengths and limitations of this study**

- 30  
31  
32 68
- 33 • This is the largest cohort study to analyse the impact of menstruation-related  
34 symptoms on work and school productivity.  
35 69
  - 36 • The survey was performed among the general female population and is  
37 consequently not per se related to one specific gynaecological condition.  
38 70
  - 39 • Due to the way of recruitment of participants, there may have been some  
40 degree of selection bias.  
41 71
  - 42 • The generalisability of the study may be limited to employment and school  
43 systems comparable to the Dutch.  
44 72
  - 45 • The generalisability of the study may be limited to employment and school  
46 systems comparable to the Dutch.  
47 73
  - 48 • The generalisability of the study may be limited to employment and school  
49 systems comparable to the Dutch.  
50 74
  - 51 • The generalisability of the study may be limited to employment and school  
52 systems comparable to the Dutch.  
53 75
  - 54 • The generalisability of the study may be limited to employment and school  
55 systems comparable to the Dutch.  
56 76
  - 57 • The generalisability of the study may be limited to employment and school  
58 systems comparable to the Dutch.  
59
  - 60 • The generalisability of the study may be limited to employment and school  
61 systems comparable to the Dutch.

## 77 **Background**

78 Menstruation-related symptoms (MRSs) are diverse and widespread among women.  
79 Symptoms include dysmenorrhea, heavy menstrual bleeding and premenstrual mood  
80 disturbances with reported prevalence of 45% to 90%, 14% to 25%, and 20% to 29%  
81 respectively.<sup>1-3</sup> Studies show that women with MRSs have lower scores on several  
82 domains of quality of life such as general health and physical, mental, social, and  
83 occupational functioning during their periods.<sup>1 4-7</sup> Furthermore, these symptoms may  
84 create considerable financial burdens on patients and their families as well as on  
85 society.<sup>5 6 8-12</sup> Such financial burdens are related to the costs of visits to the doctor,  
86 over-the-counter drugs, and medical or surgical treatment. However, costs related to  
87 productivity loss could be the largest cost driver. Productivity costs are defined as  
88 costs associated with paid and unpaid production loss and the replacement of  
89 productive people due to illness or disability.<sup>13</sup> Productivity costs can be divided into  
90 costs related to absenteeism and costs related to presenteeism. Absenteeism  
91 represents the total amount of time off work or away from school, and presenteeism  
92 represents the loss of productivity while present at a job or school.

93 Although the literature is scarce and the results are variable, studies on specific  
94 patient groups generally show that MRSs can cause absenteeism.<sup>14-16</sup> Research on  
95 the association between MRSs and presenteeism is even more limited. It has been  
96 suggested that research into possible impairments in quality of life caused by  
97 menstrual symptoms should not focus on single symptoms but rather on a complex of  
98 symptoms that vary widely but that are all related to the menstrual cycle. This  
99 complex includes both standard symptoms, like heavy menstrual bleeding and  
100 abdominal cramps, and also less common symptoms, like nausea and cold sweats.

101 17 18

1  
2  
3 102 Taking all symptoms into account, it seems likely that the real impact of MRSs is  
4  
5 103 underestimated in the general population. Despite being almost two decades into the  
6  
7 104 21<sup>st</sup> century, discussions about MRSs may still be rather taboo. This survey-based  
8  
9 105 exploratory study aimed to quantify the burden of MRSs in the general female  
10  
11 106 population, with burden defined as the number of lost days at work or school due to  
12  
13 107 absenteeism and presenteeism. Furthermore, it was aimed to study the impact of  
14  
15 108 specific symptoms on absenteeism and presenteeism.  
16  
17  
18  
19  
20 109  
21  
22

## 23 110 **Methods**

24  
25  
26 111 This cross-sectional study consisted of an online survey that was distributed from  
27  
28 112 July 12 to October 11, 2017. Approval for this study was obtained from the local  
29  
30 113 medical ethics committee “Commissie Mensgebonden Onderzoek (CMO)” under  
31  
32 114 number file number 2017-3387 on July 12<sup>th</sup> 2017. All data were anonymously  
33  
34 115 collected and stored under the privacy rules of the Radboud University Medical  
35  
36 116 Center. Patients gave informed consent when they initiated the questionnaire.  
37  
38  
39  
40  
41 117  
42  
43

## 44 118 *Patient and Public Involvement*

45  
46  
47 119 A group of women, among which were several members of the Dutch Patient  
48  
49 120 Endometriosis Foundation, women with a linguistic education and women with a  
50  
51 121 medical origin, was involved in the conduct of this study at several stages; i.e. in the  
52  
53 122 development and dissemination of the questionnaire and in the analysis and  
54  
55 123 interpretation of the results. One of the authors of this manuscript, BD, is the chair of  
56  
57 124 the Dutch Patient Endometriosis Foundation. Additional contributions are noted in the  
58  
59 125 Acknowledgements section.  
60

126

127 *Questionnaire development*

128 The questionnaire had several parts, and Appendix 1 provides details about the  
129 questions. Part 1 consisted of questions about each woman's basic characteristics.  
130 Part 2 had questions about menstrual symptoms, and part 3 had questions related to  
131 absenteeism and presenteeism. Adaptive questioning was used with a maximum of 6  
132 questions per page. Participants were asked in a lay manner how long their  
133 menstrual cycle was and what the exact meaning of a menstrual cycle was. The  
134 duration of the cycle was divided in 5 categories (25 days or less, 26-30 days, 31-35  
135 days, 36-40 days and 41 days or more). Furthermore participants could indicate if  
136 they had an irregular cycle, meaning more than 10 days difference per cycle, if they  
137 were amenorrhic due to the use of an Intra-Uterine Device (IUD) or the continuous  
138 use of oral contraceptives, or the option "I do not know". Additional questions about  
139 absenteeism and presenteeism were included that were based on the Productivity  
140 Cost Questionnaire from the Institute for Medical Technology Assessment (iMTA-  
141 PCQ).<sup>19</sup> We modified the iMTA-PCQ-recommended recall period of four weeks to  
142 three months so that it was in line with the relevant time period for this study and so  
143 we could include multiple menstrual periods. We assumed the amount of  
144 presenteeism to be larger than the amount of absenteeism. Therefore, the recall  
145 period for absenteeism was extended to six months to maintain accuracy. Visual  
146 analogue scales (VAS) were used to quantify the amount of pain, or the intensity of  
147 the symptom, and the impairment due to pain or the other symptom. Presenteeism  
148 was measured by asking women to what extent they were able to be as productive  
149 as possible compared to a day without MRSs. This was scored on a scale from 0 to  
150 10, with 0 being totally unproductive and 10 fully productive. In separate questions,

1  
2  
3 151 participants were asked to quantify their absenteeism that was related to MRSs and  
4  
5 152 absenteeism for any other reason than MRSs. For the latter, we did not specifically  
6  
7 153 ask the underlying reason.  
8  
9  
10  
11 154

### 14 155 *Target population and recruitment*

17 156 The study population comprised of women between 15 and 45 years old. The upper  
18  
19 157 age limit was chosen to avoid interference from menopausal symptoms; the lower to  
20  
21 158 have a time margin after the average menarche age, since it is known that the first  
22  
23 159 periods are irregular and often accompanied with discomfort and uncertainty. A large  
24  
25 160 number of women were approached with the aim of obtaining a cohort that was  
26  
27 161 representative of the general female population in terms of level of education,  
28  
29 162 medical history, and/or gynaecological diagnosis. Women were invited to complete a  
30  
31 163 survey using an online questionnaire tool<sup>20</sup> through a campaign on social media  
32  
33 164 platforms Facebook and Twitter. Patient organisations, colleagues, and visitors of the  
34  
35 165 Facebook page of one of the authors (TN) were asked to share the link to the  
36  
37 166 questionnaire in order to reach the widest possible audience.  
38  
39  
40  
41  
42

43 167 On July 12, 2017, a link to the questionnaire was posted on Facebook and Twitter  
44  
45 168 through the account of one of the authors (TN). In the post both women with and  
46  
47 169 without MRSs were encouraged to fill in the questionnaire. Within 24 hours of the first  
48  
49 170 posting on social media, over 6,000 respondents had filled in the questionnaire, and  
50  
51 171 by July 18, there were 15,000 respondents, which was announced by a re-post of the  
52  
53 172 link to the questionnaire. A third post was made on Facebook and Twitter on  
54  
55 173 September 16, 2017, to reach women who may have been on holiday when the first  
56  
57 174 posts were created.  
58  
59  
60



1  
2  
3 1754  
5  
6 176 *Data analysis*

7  
8  
9 177 The outcome measures were presented in a descriptive way; we used valid  
10  
11 178 percentages in case of missing values where necessary. We distinguished between  
12  
13  
14 179 women who were mainly working or mainly studying. Therefore, we present these  
15  
16 180 data for two groups i.e. for women who worked more than 5 hours per week  
17  
18 181 (“working group”) and for women who studied more than 5 hours per week (“studying  
19  
20  
21 182 group”).

22  
23  
24 183 We used binary logistic regression to calculate odds ratios. Absenteeism and  
25  
26 184 presenteeism were used as dependant variables. As independent variables we used  
27  
28 185 the following parameters: women younger than 21 versus women aged 21 and older,  
29  
30 186 smoking yes or no, reports of absenteeism not related to MRSs, educational level,  
31  
32 187 the use of oral contraception and the use of an levonorgestrel-releasing intra uterine  
33  
34 188 device. All independent variables were used in an univariate as well as a multivariate  
35  
36 189 analysis. We also studied the association between pain scores and both  
37  
38 190 absenteeism and presenteeism, given that the literature shows that pain scores of 0  
39  
40 191 to 4, 5 to 6, and 7 or higher have a different impact on activity, mood, and sleep.<sup>21 22</sup>  
41  
42  
43 192 Analyses were performed using IBM SPSS Statistics version 22.00.  
44  
45  
46  
47

48 193

49  
50  
51 194 *Assumptions and transformation of the original data*

52  
53  
54 195 To present data on level of education in an international format we had to transform  
55  
56 196 the original data, which was based on the Dutch school system.<sup>23</sup> The categorical  
57  
58 197 data of participants’ length of menstrual cycle were transformed into averages.  
59  
60

1  
2  
3 198 With regard to the evaluation of absenteeism and presenteeism, “the guideline for  
4  
5 199 economic evaluations in healthcare in the Netherlands” was used.<sup>24</sup> A work-day  
6  
7 200 accounts for 8 hours. For most sectors in the Netherlands, a full-time work-week is 36  
8  
9 201 hours. The maximum amount of working hours per year was set at 1558 when they  
10  
11 202 were working full time. We asked women to report their absenteeism due to MRSs  
12  
13 203 per cycle and used a recall period of six months.  
14  
15  
16

17 204 To calculate the percentages for absenteeism, one day of absenteeism accounted for  
18  
19 205 8 hours of lost productivity. When a woman reported to study or work more than 40  
20  
21 206 hours per week, we transformed these hours to 40 for reasons of clarity in the  
22  
23 207 calculations and comparability with the data of the Dutch Central Bureau of Statistics,  
24  
25 208 CBS. We made a few other transformations for categorical data. For absenteeism  
26  
27 209 related to MRSs, the category “more than three days per cycle” was considered to be  
28  
29 210 4 days per cycle. For absenteeism that was not related to MRSs, the category “more  
30  
31 211 than ten days in the past six months” was considered to be 11 days in the past six  
32  
33 212 months.  
34  
35  
36  
37  
38

39 213 To present yearly data, we multiplied some of these data based on the original recall  
40  
41 214 period. The number of days for absenteeism related to MRSs was based on days per  
42  
43 215 cycle, which were therefore multiplied by 12.7 based on the reported average  
44  
45 216 menstrual cycle of 28.8 days, see table 1. These values were then multiplied by one  
46  
47 217 if the woman reported that she called in sick “every period”, 0.75 if she reported  
48  
49 218 “almost every period”, 0.5 if she reported “half of all periods”, and 0.25 if she reported  
50  
51 219 calling in sick “only once in a while”. Values for absenteeism that was not related to  
52  
53 220 MRS were based on a recall period of 6 months and were therefore multiplied by two  
54  
55 221 in order to obtain the number of days per year. The values for presenteeism were  
56  
57 222 based on a recall period of three months and were therefore multiplied by four.  
58  
59  
60

223

224 **Results**

225 A total of 44,173 women initiated the questionnaire. We excluded participants who  
 226 did not report a date of birth or whose age did not fulfil the inclusion criteria (figure 1).  
 227 There were no duplicates of IP addresses. Women who did not answer questions  
 228 related to absenteeism and presenteeism were excluded. Furthermore, cases with  
 229 impossible results (e.g. 10,000,000 days of presenteeism in three months or 140  
 230 changes of sanitary pads a day) were excluded. This resulted in a total of 32,748  
 231 women in the final analysis.

232 Table 1 summarizes the basic characteristics of the participants. We found that  
 233 45.4% (n=14,839) had visited a doctor for menstrual complaints in the past, with a  
 234 total of 3017 (9.2%) women reporting a diagnosis of a menstrual disorder, such as  
 235 endometriosis or fibroids.

236 The mean age of women in the working group was higher than the mean age of  
 237 women in the studying group. The mean number of working hours per week in the  
 238 working group was 27.0 (SD 11.4), and the mean number of study hours in the  
 239 studying group was 27.4 (SD 12.1). A total of 7,335 women (22.4%) reported both  
 240 working and studying more than five hours per week. In this group, 3,001 women  
 241 were working more than 16 hours a week, and 5,284 women in the study group were  
 242 studying more than 16 hours a week.

|                   | Number<br>(percentage) | Mean $\pm$ SD  | Median |
|-------------------|------------------------|----------------|--------|
| <b>Age, years</b> |                        | 28.6 $\pm$ 8.6 | 28     |
| <b>15-19</b>      | 6,141 (18.8%)          |                |        |
| <b>20-24</b>      | 6,118 (18.7%)          |                |        |

|                                                   |                |           |    |
|---------------------------------------------------|----------------|-----------|----|
| <b>25-29</b>                                      | 5,825 (17.8%)  |           |    |
| <b>30-34</b>                                      | 5,483 (16.7%)  |           |    |
| <b>35-40</b>                                      | 4,687 (14.3%)  |           |    |
| <b>41-45</b>                                      | 4,494 (13.7%)  |           |    |
| <b>Level of education</b>                         |                |           |    |
| <b>Low</b>                                        | 4,020 (12.3%)  |           |    |
| <b>Medium</b>                                     | 12,335 (37.9%) |           |    |
| <b>High</b>                                       | 16,229 (49.8%) |           |    |
| <b>Hours/week</b>                                 |                |           |    |
| <b>Paid work</b>                                  |                | 21.7±14.7 | 24 |
| <b>Study</b>                                      |                | 7.4±13.6  | 0  |
| <b>Voluntary work</b>                             |                | 0.8±3.1   | 0  |
| <b>Menstrual cycle</b>                            |                |           |    |
| <b>Regular cycle</b>                              | 25,717 (78.5%) |           |    |
| <b>Duration</b>                                   |                | 28.8±3.0  | 28 |
| <b>Amenorrhoea due to LG-IUD/OC</b>               | 3,675 (11.2%)  |           |    |
| <b>Irregular, variation &gt;10 days per cycle</b> | 2,495 (7.6%)   |           |    |
| <b>Do not know</b>                                | 861 (2.6%)     |           |    |
| <b>Days with blood loss per cycle</b>             |                | 5.4±1.6   | 5  |
| <b>Visited a doctor for MRSs</b>                  |                |           |    |
| <b>No</b>                                         | 17,873 (54.6%) |           |    |
| <b>Yes, general practitioner</b>                  | 10,141 (31.0%) |           |    |
| <b>Yes, gynaecologist</b>                         | 4,698 (14.4%)  |           |    |
| <b>Diagnosis for MRSs*</b>                        |                |           |    |
| <b>No</b>                                         | 29,731 (90.8%) |           |    |
| <b>Yes</b>                                        | 3,017 (9.2%)   |           |    |
| <b>Endometriosis</b>                              | 1,120 (3.4%)   |           |    |
| <b>PCOS</b>                                       | 588 (1.8%)     |           |    |
| <b>Adenomyosis</b>                                | 103 (0.3%)     |           |    |

|                                                    |                |           |    |
|----------------------------------------------------|----------------|-----------|----|
| <b>Fibroids</b>                                    | 275 (0.8%)     |           |    |
| <b>Other</b>                                       | 1,901 (5.8%)   |           |    |
| <b>Contraception*</b>                              |                |           |    |
| <b>Hormonal contraception</b>                      | 11,993 (36.6%) |           |    |
| <b>OC</b>                                          | 8,650 (26.4%)  |           |    |
| <b>LG-IUD</b>                                      | 2,752 (8.4%)   |           |    |
| <b>Other hormonal: injection, transdermal etc.</b> | 882 (2.7%)     |           |    |
| <b>No hormonal contraception</b>                   | 20,755 (63.4%) |           |    |
| <b>Cu-IUD</b>                                      | 771 (2.4%)     |           |    |
| <b>Female sterilisation</b>                        | 423 (1.3%)     |           |    |
| <b>No female contraception</b>                     | 19,639 (60.0%) |           |    |
| <b>Nulliparous</b>                                 | 21,585 (66.0%) |           |    |
| <b>Paid work &gt;5 hr a week</b>                   | 26,104 (79.7%) |           |    |
| <b>Age</b>                                         |                | 29.7±8.3  | 29 |
| <b>Hours of paid work/week</b>                     |                | 27.0±11.4 | 28 |
| <b>Hours spent on study/week</b>                   |                | 7.5±13.4  | 0  |
| <b>&gt;40 hours of paid work/week</b>              | 1,047 (3.2%)   |           |    |
| <b>Study &gt;5 hr a week</b>                       | 8,764 (26.8%)  |           |    |
| <b>Age</b>                                         |                | 22.0±6.2  | 20 |
| <b>Hours spent on study/week</b>                   |                | 27.4±12.1 | 30 |
| <b>Hours of paid work/week</b>                     |                | 15.5±11.3 | 12 |
| <b>&gt;40 hours spent on study/week</b>            | 322 (1.0%)     |           |    |

243

244 Table 1 | Basic characteristics of study participants (n=32,748) Mean duration of  
 245 cycle based on women with a regular cycle. SD = standard deviation, MRSs =  
 246 menstruation-related symptoms, PCOS = polycystic ovary syndrome, OC = oral  
 247 contraceptive, LG-IUD = levonorgestrel-releasing intrauterine device, Cu-IUD =  
 248 copper intrauterine device. \*More than one answer possible.

249

1  
2  
3 250 *Absenteeism*  
4  
5

6 251 Table 2 shows the results on absenteeism due to MRSs. Although 13.8% of the  
7  
8 252 women (n=4,514) reported absenteeism due to MRSs, only 1,108 women (3.4%)  
9  
10 253 reported absenteeism every cycle or almost every cycle. The percentage of  
11  
12 254 absenteeism in every cycle or almost every cycle was 2.4% in the working group and  
13  
14 255 4.5% in the studying group. The mean absenteeism due to MRSs was 0.9 days per  
15  
16 256 year for the working group and 1.6 day per year for the study group.  
17  
18  
19

20  
21 257 We also calculated the mean total absenteeism that was not related to MRSs. For the  
22  
23 258 entire group, this was 3.3 days per year; for the working group, it was 3.5 days, and  
24  
25 259 for the studying group, it was 4.3 days. The mean percentage of absenteeism that  
26  
27 260 was not related to MRSs was 3.5% in the working group and 3.7% in the studying  
28  
29 261 group. Consequently, absenteeism due to MRSs in our cohort accounted for, on  
30  
31 262 average, 22% of the total absenteeism in the working group and 24% in the studying  
32  
33 263 group.  
34  
35  
36  
37

38 264  
39  
40  
41  
42  
43  
44  
45  
46  
47  
48  
49  
50  
51  
52  
53  
54  
55  
56  
57  
58  
59  
60

|                                           | Number<br>(percentage) | Mean $\pm$ SD |
|-------------------------------------------|------------------------|---------------|
| <b>All (n=32,748)</b>                     |                        |               |
| <b>Absenteeism</b>                        | 4,514 (13.8)           |               |
| <b><math>\leq 0.5</math> day</b>          | 538 (1.6%)             |               |
| <b>1 day</b>                              | 2,259 (6.9%)           |               |
| <b>2 days</b>                             | 1,171 (3.6%)           |               |
| <b>3 days</b>                             | 349 (1.1%)             |               |
| <b>&gt;3 days</b>                         | 184 (0.6%)             |               |
| <b>Total days of absenteeism per year</b> |                        | 1.3 $\pm$ 5.9 |
| <b>Work (n=26,104)</b>                    |                        |               |
| <b>Absenteeism</b>                        | 2,926 (11.2%)          |               |
| <b><math>\leq 0.5</math> day</b>          | 374 (1.4%)             |               |
| <b>1 day</b>                              | 1,476 (5.7%)           |               |
| <b>2 days</b>                             | 757 (2.9%)             |               |
| <b>3 days</b>                             | 211 (0.8%)             |               |
| <b>&gt;3 days</b>                         | 98 (0.4%)              |               |
| <b>Total days of absenteeism per year</b> |                        | 0.9 $\pm$ 3.9 |
| <b>Study (n=8,764)</b>                    |                        |               |
| <b>Absenteeism</b>                        | 1,715 (19.6%)          |               |
| <b><math>\leq 0.5</math> day</b>          | 234 (2.7%)             |               |
| <b>1 day</b>                              | 921 (10.5%)            |               |
| <b>2 days</b>                             | 423 (4.8%)             |               |
| <b>3 days</b>                             | 92 (1.0%)              |               |
| <b>&gt;3 days</b>                         | 41 (0.5%)              |               |
| <b>Total days of absenteeism per year</b> |                        | 1.6 $\pm$ 5.0 |

265

266 Table 2 | Reported absenteeism caused by menstruation-related symptoms. Women  
 267 were asked to report the average amount of days on which they were absent due to  
 268 menstruation-related symptoms per cycle. The total days of absenteeism per year

269 was calculated. The added numbers of women in the work and study group exceed  
 270 the total amount of participants, since 2,120 women reported to both study and work  
 271 more than 5 hours/week. SD = standard deviation

272

### 273 *Presenteeism*

274 Table 3 shows the numbers reported for presenteeism. Over 80% of all women  
 275 reported presenteeism during their periods. The differences between the working  
 276 group and the study group were not large in terms of prevalence and lost productivity.  
 277 The mean number of lost productive days per year due to presenteeism was more  
 278 than seven-fold greater than the mean number of lost productive days due to  
 279 absenteeism.

|                                                | Number<br>(percentage) | Mean ± SD | Median |
|------------------------------------------------|------------------------|-----------|--------|
| <b>All (n=32,748)</b>                          |                        |           |        |
| <b>Presenteeism</b>                            | 26,438<br>(80.7%)      |           |        |
| <b>Number of days in the past 3 months</b>     |                        | 5.8±5.3   | 5.0    |
| <b>Percentage of productivity loss per day</b> |                        | 33.0±24.8 | 30.0   |
| <b>Days/year of lost productivity</b>          |                        | 8.9±11.0  | 5.6    |
| <b>Work (n=26,104)</b>                         |                        |           |        |
| <b>Presenteeism</b>                            | 21,252<br>(81.4%)      |           |        |
| <b>Number of days in the past 3 months</b>     |                        | 5.7±5.2   | 5.0    |
| <b>Percentage of productivity loss per day</b> |                        | 31.7±24.7 | 30.0   |
| <b>Days/year of lost productivity</b>          |                        | 8.4±10.6  | 4.8    |
| <b>Study (n=8,764)</b>                         |                        |           |        |
| <b>Presenteeism</b>                            | 7,385 (84.3%)          |           |        |
| <b>Number of days in the past 3 months</b>     |                        | 6.3±5.3   | 5.0    |
| <b>Percentage of productivity loss per day</b> |                        | 36.8±24.2 | 40.0   |



|                                       |  |           |     |
|---------------------------------------|--|-----------|-----|
| <b>Days/year of lost productivity</b> |  | 10.5±11.8 | 7.2 |
|---------------------------------------|--|-----------|-----|

280

281 Table 3 | Reported presenteeism caused by menstruation-related symptoms. Women  
 282 were asked to report the amount of days on which they were less productive and to  
 283 what extent. The total days of lost productivity per year was calculated. The added  
 284 numbers of women in the work and study group exceed the total amount of  
 285 participants, since 2,120 women reported to both study and work more than 5  
 286 hours/week. SD = standard deviation

287

### 288 *Factors associated with absenteeism and presenteeism*

289 Figure 2 shows the association between reported pain or discomfort scores and both  
 290 absenteeism and presenteeism. As seen in detail in table 4, high VAS scores were  
 291 significantly associated with higher levels of absenteeism and presenteeism. The  
 292 strongest relationship was found for abdominal pain scores that were 7 or higher on a  
 293 scale from 0 to ten. Odds ratios were 5.6 for absenteeism (95% confidence interval:  
 294 5.0 to 6.2) and 8.8 for presenteeism (95% confidence interval: 8.1 to 9.5). Figure 3  
 295 shows the association between age and both presenteeism and absenteeism. As  
 296 shown in both figure 3 and table 4, we found that younger women showed  
 297 significantly higher rates of absenteeism and presenteeism. A levonorgestrel–  
 298 releasing intrauterine device is associated with especially less presenteeism.

|                                                                           | Absenteeism   |                              | Presenteeism  |                              |
|---------------------------------------------------------------------------|---------------|------------------------------|---------------|------------------------------|
|                                                                           | OR (95% CI)   | OR after correction (95% CI) | OR (95% CI)   | OR after correction (95% CI) |
| <b>Age&lt;21 years<sup>a</sup></b>                                        | 3.7 (3.4-3.9) | 3.3 (3.1-3.6)                | 1.4 (1.3-1.5) | 1.3 (1.2-1.4)                |
| <b>Smoking<sup>b</sup></b>                                                | 1.3 (1.2-1.5) | 1.3 (1.2-1.4)                | 1.5 (1.3-1.6) | 1.4 (1.3-1.6)                |
| <b>Absenteeism not related to MRSs in the past six months<sup>c</sup></b> | 2.2 (2.1-2.4) | 1.7 (1.6-1.9)                | 1.4 (1.3-1.5) | 1.3 (1.2-1.4)                |
| <b>Level of education<sup>d</sup></b>                                     |               |                              |               |                              |

|                                              |        |               |                 |               |                |
|----------------------------------------------|--------|---------------|-----------------|---------------|----------------|
|                                              | Low    | 4.5 (4.1-4.9) | 2.7 (2.4-3.0)   | 1.3 (1.2-1.4) | 1.1 (1.0-1.2)* |
|                                              | Medium | 2.2 (2.1-2.4) | 1.7 (1.5-1.8)   | 1.3 (1.2-1.4) | 1.2 (1.1-1.2)  |
|                                              | High   | 1.0 (n/a)     | 1.0 (n/a)       | 1.0 (n/a)     | 1.0 (n/a)      |
| <b>Oral contraception<sup>e</sup></b>        |        |               |                 |               |                |
|                                              | No     | 1.0 (n/a)     | 1.0 (n/a)       | 1.0 (n/a)     | 1.0 (n/a)      |
|                                              | Yes    | 1.2 (1.1-1.3) | 1.0 (0.9-1.1)** | 0.9 (0.9-1.0) | 0.9 (0.8-0.9)  |
| <b>LG-IUD<sup>e</sup></b>                    |        |               |                 |               |                |
|                                              | No     | 1.0 (n/a)     | 1.0 (n/a)       | 1.0 (n/a)     | 1.0 (n/a)      |
|                                              | Yes    | 0.7 (0.6-0.8) | 0.9 (0.8-1.0)   | 0.5 (0.5-0.6) | 0.5 (0.5-0.6)  |
| <b>Abdominal pain score<sup>e</sup></b>      |        |               |                 |               |                |
|                                              | 0-4    | 1.0 (n/a)     | 1.0 (n/a)       | 1.0 (n/a)     | 1.0 (n/a)      |
|                                              | 5-6    | 2.6 (2.3-2.9) | 2.2 (1.9-2.4)   | 5.2 (4.8-5.7) | 5.3 (4.9-5.7)  |
|                                              | >7     | 7.0 (6.4-7.8) | 5.6 (5.0-6.2)   | 8.7 (8.0-9.4) | 8.8 (8.1-9.5)  |
| <b>Headache pain score<sup>e</sup></b>       |        |               |                 |               |                |
|                                              | 0-4    | 1.0 (n/a)     | 1.0 (n/a)       | 1.0 (n/a)     | 1.0 (n/a)      |
|                                              | 5-6    | 1.5 (1.3-1.6) | 1.5 (1.4-1.6)   | 3.0 (2.7-3.3) | 3.1 (2.8-3.4)  |
|                                              | >7     | 2.0 (1.8-2.1) | 2.3 (2.1-2.5)   | 3.5 (3.2-3.9) | 3.7 (3.4-4.1)  |
| <b>Backache pain score<sup>e</sup></b>       |        |               |                 |               |                |
|                                              | 0-4    | 1.0 (n/a)     | 1.0 (n/a)       | 1.0 (n/a)     | 1.0 (n/a)      |
|                                              | 5-6    | 1.6 (1.5-1.7) | 1.4 (1.3-1.5)   | 3.5 (3.2-3.9) | 3.5 (3.2-3.8)  |
|                                              | >7     | 2.7 (2.5-2.9) | 2.2 (2.1-2.4)   | 4.7 (4.2-5.2) | 4.5 (4.0-5.0)  |
| <b>Tiredness intensity score<sup>e</sup></b> |        |               |                 |               |                |
|                                              | 0-4    | 1.0 (n/a)     | 1.0 (n/a)       | 1.0 (n/a)     | 1.0 (n/a)      |
|                                              | 5-6    | 1.8 (1.7-2.0) | 1.8 (1.6-2.0)   | 3.3 (3.1-3.6) | 3.3 (3.1-3.6)  |
|                                              | >7     | 3.0 (2.8-3.2) | 2.8 (2.6-3.1)   | 5.1 (4.7-5.6) | 5.2 (4.7-5.7)  |
| <b>Psychological complaints intensity</b>    |        |               |                 |               |                |

| score <sup>e</sup> |     |               |               |               |               |
|--------------------|-----|---------------|---------------|---------------|---------------|
|                    | 0-4 | 1.0 (n/a)     | 1.0 (n/a)     | 1.0 (n/a)     | 1.0 (n/a)     |
|                    | 5-6 | 1.6 (1.5-1.7) | 1.5 (1.4-1.7) | 2.7 (2.5-2.9) | 2.6 (2,5-2.9) |
|                    | >7  | 2.2 (2.0-2.4) | 2.1 (2.0-2.3) | 4.4 (4.0-4.7) | 4.3 (4.0-4.7) |

299

300 Table 4 | Odd ratios (ORs) and 95% confidence intervals (95% CIs) for factors  
 301 related to absenteeism and presenteeism. ORs >1 correlate with a higher prevalence  
 302 of absenteeism or presenteeism. ORs <1 correlate with a lower prevalence of  
 303 absenteeism or presenteeism.

304 LG-IUD = Levonorgestrel-releasing intra uterine device

305 <sup>a</sup>Correction for smoking and absenteeism that was not related to menstruation-

306 related symptoms (MRSs); <sup>b</sup>Correction for age, absenteeism that was not related to

307 MRSs, and level of education; <sup>c</sup>Correction for age, smoking, and level of education;

308 <sup>d</sup>Correction for age, smoking, and absenteeism that was not related to MRSs;

309 <sup>e</sup>Correction for age, smoking, absenteeism that was not related to MRSs, and level of

310 education. \*p=0.26, \*\*p=0,73 For all other ORs, p<0.05

311

### 312 *Menstruation and suggested implications for schools and workplaces*

313 From the respondent who had been calling in sick due to MRSs, 20.1% (n=908) told

314 their employer or school menstrual symptoms were the reason, 46.4% (n=2092) only

315 mentioned the presenting symptom. No reason was given by 27.7% (n=1250), while

316 5.8% (n=260) made up another reason. Comparing women aged below 21 with

317 women aged 21 and above, we found that younger women were less open about

318 their MRSs being the reason for calling in sick (12.0%) versus women older than 21

319 (27.0%). Women were asked to report suggestions on how work places and

320 conditions could be changed in order for them to function better during their

321 menstrual periods. There were 32,708 responses to this multiple-choice question, to

322 which each woman could give more than one answer. The majority of women

1  
2  
3 323 (67.7%, n=22,154) preferred more flexibility during their periods, such as the  
4  
5 324 possibility of doing less physical work (32.1%, n=10,499), the ability to work from  
6  
7 325 home (39.5%, n=12,917), more time for personal care (28.3%, n=9,241), or the ability  
8  
9 326 to take a day off and make up for it later (11.5%, n=3,756). In addition, 32.9% wished  
10  
11 327 they could take a complete day off without any consequences. 27.2% (n=8,890) did  
12  
13 328 not wish for any changes in policy. Many women (79.7%, n=26,072) were open to  
14  
15 329 discussing MRSs with their company doctor, and 56.7% (n=18,579) thought that  
16  
17 330 doing so would draw more attention to MRS-related matters.  
18  
19  
20  
21  
22  
23  
24  
25  
26  
27  
28  
29  
30  
31  
32  
33  
34  
35  
36  
37  
38  
39  
40  
41  
42  
43  
44  
45  
46  
47  
48  
49  
50  
51  
52  
53  
54  
55  
56  
57  
58  
59  
60

## 331 **Discussion**

332 This survey-based study showed that menstruation-related absenteeism and, to a  
333 greater extent, presenteeism are widespread in the general female population. In our  
334 cohort, MRSs accounted for up to 24% of total absenteeism for women who were  
335 working and studying. The annual productivity loss due to presenteeism was seven-  
336 fold times more than the annual productivity loss due to absenteeism and women  
337 younger than 21 years experience the largest burden. Symptom severity scores  
338 showed significant and strong associations with both absenteeism and presenteeism.  
339 When women called in sick due to MRSs, only one in five stated openly that  
340 menstrual symptoms were the main reason. A majority of women prefers more  
341 flexibility during their periods when it comes to work or school.

342 There have been few studies on absenteeism and presenteeism related to MRSs in  
343 the general female population. To our knowledge, Tanaka's study<sup>25</sup> is the only other  
344 published study on absenteeism and presenteeism due to MRSs in the general  
345 female population. In a cohort of 19,254 Japanese women, a total of 3,311 (17.2%)  
346 reported work productivity lost in the prior 3 months, mostly in the form of decreased  
347 efficiency (62.0%, n=2,052). Of these 2,052 subjects, the mean number of workdays  
348 lost due to decreased efficiency was 5.7 days in 3 months. After recalculation, this  
349 accounts for 2.4 days per year for the entire population. This is fewer days than the  
350 8.9 days per year in our cohort. On the other hand, the numbers for absenteeism  
351 were more similar, with a mean of 1.0 day of absenteeism per year in the entire  
352 Japanese cohort compared to 1.2 days in our cohort. Differences in regulations of  
353 social services, a difference in attitude towards sick leave and a different method of  
354 data collection might explain these differences. It has been suggested in research on  
355 musculoskeletal symptoms that rates of absenteeism might be lower in Japan

1  
2  
3 356 compared to European countries and the United States. Consequently, presenteeism  
4  
5 357 might therefore be a more representative variable.<sup>26 27</sup>  
6  
7

8 358 More data are available regarding the impact of dysmenorrhoea on quality of life and  
9  
10 359 absenteeism. De Sanctis et al. reviewed studies on dysmenorrhea in multiple  
11  
12 360 countries, some of which included menstruation-related absenteeism data. They  
13  
14 361 found that the prevalence of school absences in adolescents that was due to  
15  
16 362 dysmenorrhea varied between 7.7% and 57.8%. Since the review included 41,140  
17  
18 363 women in 27 countries, and there was a high degree of heterogeneity in the outcome  
19  
20 364 measures, no firm conclusions could be drawn. Hailemeskel et al. evaluated 440  
21  
22 365 female university students in Ethiopia.<sup>28</sup> Among students with dysmenorrhea, 66.8%  
23  
24 366 reported a loss of concentration in class, and 56.3% reported class absences during  
25  
26 367 the last month. In a questionnaire-based study of 706 Hispanic female adolescents,  
27  
28 368 38% reported missing school due to dysmenorrhea during the 3 months prior to the  
29  
30 369 survey, and 59% reported a decrease in concentration in class due to dysmenorrhea.  
31  
32 370 <sup>29</sup>  
33  
34  
35  
36  
37  
38

39 371 Absenteeism and presenteeism due to endometriosis in other studies was greater  
40  
41 372 than in our study, which was not surprising.<sup>9 14 30</sup> However, some interesting parallels  
42  
43 373 can be drawn to findings from a recent study by Soliman et al.<sup>14</sup> They found that the  
44  
45 374 average number of hours of presenteeism, 5.3 hours per week, was far greater than  
46  
47 375 the number of hours of absenteeism, which was 1.1 hours per week. Furthermore,  
48  
49 376 younger women had significantly higher levels of lost productivity than their older  
50  
51 377 counterparts, and more severe symptoms were associated with more absenteeism  
52  
53 378 and presenteeism. This was in line with our findings, since we also found higher rates  
54  
55 379 of both absenteeism and presenteeism in younger women. A taboo on talking openly  
56  
57 380 about MRS, under-treatment and less flexibility at school might be possible  
58  
59  
60

1  
2  
3 381 explanations for these differences. Comparing our outcomes with studies on other  
4  
5 382 non-gynaecological conditions is hard due to differences in methods and  
6  
7 383 presentation of findings and the cyclic character of MRSs. However, the incidence of  
8  
9  
10 384 presenteeism seems to be as high as it is in patients with inflammatory bowel  
11  
12 385 disease.<sup>31</sup> Moreover, the amount of work impairment is comparable with severe  
13  
14 386 gastroesophageal reflux (31.9%), moderate irritable bowel syndrome (36.6%) and  
15  
16 387 allergic rhinitis (33.4%-39.8%).<sup>32</sup>

17  
18  
19  
20 388 Our finding that only 20.1% of women were open about their menstrual symptoms as  
21  
22 389 a reason for calling in sick may confirm the general idea that women tend not to  
23  
24 390 speak openly about MRSs. Wong et al. found that in a cohort of schoolgirls in  
25  
26 391 Malaysia, 76.1% considered dysmenorrhoea a normal part of the menstrual cycle.<sup>15</sup>  
27  
28 392 In the context of the findings noted above, our study also suggests there is a taboo  
29  
30 393 for women in terms of discussing menstrual problems with their employers. The latter  
31  
32 394 may therefore conclude that the impact of MRSs on their employees is negligible.  
33  
34 395 Considering the fact that we also found that 68% of women wish that they had  
35  
36 396 greater flexibility during their periods, either at school or at work, more openness  
37  
38 397 about MRSs in the employment setting seems desirable. The reasons underlying this  
39  
40 398 taboo are likely to have a historical basis; indeed, since ancient times, menstruation  
41  
42 399 has been surrounded with mythical stories and has not been well understood.  
43  
44 400 However, in recent years, the lay literature in developed countries has focused more  
45  
46 401 attention on MRSs. <sup>33-35</sup> The prevalence and the impact of MRSs on the general  
47  
48 402 population and the number of women who are asking for a different approach all  
49  
50 403 reflect the need to change the view of menstrual symptoms and the way they are  
51  
52 404 addressed in society.  
53  
54  
55  
56  
57  
58  
59  
60

1  
2  
3 405 This study consisted of a large cohort, and it reached a large number of women  
4  
5 406 within the age range that was aimed for. The questionnaire was developed in  
6  
7 407 collaboration with patient representatives to make it understandable by and relevant  
8  
9 408 to most women. The cohort appeared to be a representative sample of the general  
10  
11 409 female population based on the number of working hours.<sup>33</sup> When we compare our  
12  
13 410 data with the national registries the total amount of absenteeism is found to be  
14  
15 411 comparable, regardless of whether it was related to MRSs.<sup>36 37</sup> It is difficult to  
16  
17 412 compare our numbers on women with a diagnosis explaining their MRSs with  
18  
19 413 numbers found in other studies. We found that only 9% of the participants had such a  
20  
21 414 diagnosis, which seems about as expected or even somewhat low.<sup>3 38-40</sup> In contrast,  
22  
23 415 45% of the women in the study reported consulting a physician for their MRSs. This  
24  
25 416 number was relatively high compared to other studies in which, for example, the  
26  
27 417 percentage of women with dysmenorrhoea who sought medical advice was  
28  
29 418 approximately 15%.<sup>15 16</sup> An important factor might be the Dutch health system in  
30  
31 419 which general practitioners are available free of charge. Women with a low level of  
32  
33 420 education were relatively underrepresented.<sup>41</sup> As our results show, especially  
34  
35 421 absenteeism related to MRSs is associated with a low level of education, and this  
36  
37 422 might have biased our results. We expect women with lower educational levels to do  
38  
39 423 more physical jobs or jobs with less flexibility. Therefore, our findings on work  
40  
41 424 productivity loss might be underestimated. On the other hand, our finding could be  
42  
43 425 overestimated due to the possibility that women with more MRSs might be more  
44  
45 426 likely to respond to a questionnaire, as it may seem more relevant to them. Moreover,  
46  
47 427 we were not able to provide data on presenteeism not related to MRSs nor were we  
48  
49 428 able to correct for comorbid health conditions. Thus, these results must be  
50  
51 429 interpreted with caution. Due to the way that the questionnaire was distributed  
52  
53 430 through social media, there may have been some selection bias. However, a recent



1  
2  
3 431 review stated that Facebook is a useful recruitment tool for healthcare research.<sup>42</sup>  
4  
5 432 Although we did not use a validated questionnaire, our most important outcomes  
6  
7 433 were based on questions derived from the PCQ, which itself is based on validated  
8  
9 434 questions and which is recommended by guidelines for cost research.<sup>24</sup> Self-reported  
10  
11 435 absenteeism generally shows a good correlation with official records, although  
12  
13 436 accuracy decreases with increasing recall period.<sup>43</sup> This might have initiated a recall  
14  
15 437 bias in our cohort. It is unknown to what extent recall bias affects reports on  
16  
17 438 presenteeism.<sup>44</sup> In general, although results vary among studies on premenstrual  
18  
19 439 complaints, a prospective collection of data on symptoms is advisable.<sup>45 46</sup>  
20  
21 440 Furthermore, an extrapolation of a three and six months timeframe to a yearly basis  
22  
23 441 may intrinsically imply some degree of uncertainty, for example when the influenza  
24  
25 442 season is not included in the original analysis. Finally, these results may not be  
26  
27 443 generalized internationally due to variability in the regulation of social services in  
28  
29 444 different countries, and this is also a limitation of our study. In The Netherlands,  
30  
31 445 wages are paid during sick leave that has duration of less than 1 year, but women in  
32  
33 446 other countries may not have this benefit. Since we know that many factors influence  
34  
35 447 menstrual symptoms, including biological, cultural, and environmental factors, these  
36  
37 448 differences might well influence both absenteeism and presenteeism.<sup>6 14 47</sup>  
38  
39  
40  
41  
42  
43  
44  
45 449 In conclusion, we have found that the impact of MRSs on work and school  
46  
47 450 productivity is considerable and that presenteeism contributes significantly more to  
48  
49 451 the matter than absenteeism. Future research should identify how women affected by  
50  
51 452 MRSs could be helped best and how their productivity can be improved in order to  
52  
53 453 reduce the societal impact regarding absenteeism and presenteeism.  
54  
55  
56  
57  
58 454  
59  
60

1  
2  
3 455 **References**  
4  
5

- 6 456 1. Iacovides S, Avidon I, Baker FC. What we know about primary dysmenorrhoea today: a critical  
7 457 review. *Hum Reprod Update* 2015;21(6):762-78. doi: 10.1093/humupd/dmv039  
8 458 2. Yonkers KA, Simoni MK. Premenstrual disorders. *Am J Obstet Gynecol* 2018;218(1):68-74. doi:  
9 459 10.1016/j.ajog.2017.05.045  
10 460 3. Shapley M, Jordan K, Croft PR. An epidemiological survey of symptoms of menstrual loss in the  
11 461 community. *The British journal of general practice : the journal of the Royal College of*  
12 462 *General Practitioners* 2004;54(502):359-63. [published Online First: 2004/04/29]  
13 463 4. Liu Z, Doan QV, Blumenthal P, et al. A systematic review evaluating health-related quality of life,  
14 464 work impairment, and health-care costs and utilization in abnormal uterine bleeding. *Value*  
15 465 *Health* 2007;10(3):183-94. doi: 10.1111/j.1524-4733.2007.00168.x  
16 466 5. Rapkin AJ, Winer SA. Premenstrual syndrome and premenstrual dysphoric disorder: quality of life  
17 467 and burden of illness. *Expert review of pharmacoeconomics & outcomes research*  
18 468 2009;9(2):157-70. doi: 10.1586/erp.09.14 [published Online First: 2009/05/01]  
19 469 6. Knox B, Azurah AG, Grover SR. Quality of life and menstruation in adolescents. *Curr Opin Obstet*  
20 470 *Gynecol* 2015;27(5):309-14. doi: 10.1097/GCO.000000000000199  
21 471 7. Peuranpaa P, Heliövaara-Peippo S, Fraser I, et al. Effects of anemia and iron deficiency on quality  
22 472 of life in women with heavy menstrual bleeding. *Acta Obstet Gynecol Scand* 2014;93(7):654-  
23 473 60. doi: 10.1111/aogs.12394  
24 474 8. Jensen JT, Lefebvre P, Laliberte F, et al. Cost burden and treatment patterns associated with  
25 475 management of heavy menstrual bleeding. *J Womens Health (Larchmt)* 2012;21(5):539-47.  
26 476 doi: 10.1089/jwh.2011.3147  
27 477 9. Fourquet J, Baez L, Figueroa M, et al. Quantification of the impact of endometriosis symptoms on  
28 478 health-related quality of life and work productivity. *Fertil Steril* 2011;96(1):107-12. doi:  
29 479 10.1016/j.fertnstert.2011.04.095  
30 480 10. Klein S, D'Hooghe T, Meuleman C, et al. What is the societal burden of endometriosis-associated  
31 481 symptoms? a prospective Belgian study. *Reprod Biomed Online* 2014;28(1):116-24. doi:  
32 482 10.1016/j.rbmo.2013.09.020  
33 483 11. Heinemann LA, Minh TD, Filonenko A, et al. Explorative evaluation of the impact of severe  
34 484 premenstrual disorders on work absenteeism and productivity. *Women's health issues : official publication of the Jacobs Institute of Women's Health* 2010;20(1):58-65. doi:  
35 485 10.1016/j.whi.2009.09.005 [published Online First: 2010/02/04]  
36 486 12. Frick KD, Clark MA, Steinwachs DM, et al. Financial and quality-of-life burden of dysfunctional  
37 487 uterine bleeding among women agreeing to obtain surgical treatment. *Women's health*  
38 488 *issues : official publication of the Jacobs Institute of Women's Health* 2009;19(1):70-8. doi:  
39 489 10.1016/j.whi.2008.07.002  
40 490 13. Krol M, Brouwer W, Rutten F. Productivity costs in economic evaluations: past, present, future.  
41 491 *Pharmacoeconomics* 2013;31(7):537-49. doi: 10.1007/s40273-013-0056-3  
42 492 14. Soliman AM, Coyne KS, Gries KS, et al. The Effect of Endometriosis Symptoms on Absenteeism  
43 493 and Presenteeism in the Workplace and at Home. *Journal of managed care & specialty*  
44 494 *pharmacy* 2017;23(7):745-54. doi: 10.18553/jmcp.2017.23.7.745 [published Online First:  
45 495 2017/06/27]  
46 496 15. Wong LP. Attitudes towards dysmenorrhoea, impact and treatment seeking among adolescent  
47 497 girls: a rural school-based survey. *Aust J Rural Health* 2011;19(4):218-23. doi: 10.1111/j.1440-  
48 498 1584.2011.01213.x  
49 499 16. De Sanctis V, Soliman AT, Elsedfy H, et al. Dysmenorrhoea in adolescents and young adults: a  
50 500 review in different countries. *Acta bio-medica : Atenei Parmensis* 2017;87(3):233-46.  
51 501 [published Online First: 2017/01/24]  
52 502 17. Sharp BAC, Taylor DL, Thomas KK, et al. Cyclic Perimenstrual Pain and Discomfort: The Scientific  
53 503 Basis for Practice. *Journal of Obstetric, Gynecologic & Neonatal Nursing* 2002;31(6):637-49.  
54 504 doi: 10.1177/0884217502239207  
55 505

1  
2  
3  
4  
5  
6  
7  
8  
9  
10  
11  
12  
13  
14  
15  
16  
17  
18  
19  
20  
21  
22  
23  
24  
25  
26  
27  
28  
29  
30  
31  
32  
33  
34  
35  
36  
37  
38  
39  
40  
41  
42  
43  
44  
45  
46  
47  
48  
49  
50  
51  
52  
53  
54  
55  
56  
57  
58  
59  
60

18. Monagle L, Dan A, Krogh V, et al. Perimenstrual symptom prevalence rates: an Italian-American comparison. *American journal of epidemiology* 1993;138(12):1070-81. [published Online First: 1993/12/15]
19. Bouwmans C, Krol M, Severens H, et al. The iMTA Productivity Cost Questionnaire: A Standardized Instrument for Measuring and Valuing Health-Related Productivity Losses. *Value Health* 2015;18(6):753-8. doi: 10.1016/j.jval.2015.05.009
20. SurveyMonkey. SurveyMonkey, software for online surveys 2018 [Available from: <http://www.surveymonkey.net>].
21. Bodian CA, Freedman G, Hossain S, et al. The visual analog scale for pain: clinical significance in postoperative patients. *Anesthesiology* 2001;95(6):1356-61. [published Online First: 2001/12/19]
22. Serlin RC, Mendoza TR, Nakamura Y, et al. When is cancer pain mild, moderate or severe? Grading pain severity by its interference with function. *Pain* 1995;61(2):277-84. [published Online First: 1995/05/01]
23. UNESCO Institute for Statistics U. International Standard Classification of Education ISCED 2011, 2012.
24. Dutch Healthcare Institution (Zorginstituut Nederland) D. Guideline for the execution of economic evaluations in healthcare. (Richtlijn voor het uitvoeren van economische evaluaties in de gezondheidszorg). 2016. <https://www.zorginstituutnederland.nl/publicaties/publicatie/2016/02/29/richtlijn-voor-het-uitvoeren-van-economische-evaluaties-in-de-gezondheidszorg>.
25. Tanaka E, Momoeda M, Osuga Y, et al. Burden of menstrual symptoms in Japanese women: results from a survey-based study. *Journal of medical economics* 2013;16(11):1255-66. doi: 10.3111/13696998.2013.830974 [published Online First: 2013/09/11]
26. Nakata K, Tsuji T, Vietri J, et al. Work impairment, osteoarthritis, and health-related quality of life among employees in Japan. *Health and quality of life outcomes* 2018;16(1):64. doi: 10.1186/s12955-018-0896-9 [published Online First: 2018/04/19]
27. Matsudaira K, Palmer KT, Reading I, et al. Prevalence and correlates of regional pain and associated disability in Japanese workers. *Occupational and environmental medicine* 2011;68(3):191-6. doi: 10.1136/oem.2009.053645 [published Online First: 2010/09/14]
28. Hailemeskel S, Demissie A, Assefa N. Primary dysmenorrhea magnitude, associated risk factors, and its effect on academic performance: evidence from female university students in Ethiopia. *International journal of women's health* 2016;8:489-96. doi: 10.2147/ijwh.s112768 [published Online First: 2016/10/04]
29. Banikarim C, Chacko MR, Kelder SH. Prevalence and impact of dysmenorrhea on Hispanic female adolescents. *Archives of pediatrics & adolescent medicine* 2000;154(12):1226-9. [published Online First: 2000/12/15]
30. Nnoaham KE, Hummelshoj L, Webster P, et al. Impact of endometriosis on quality of life and work productivity: a multicenter study across ten countries. *Fertil Steril* 2011;96(2):366-73 e8. doi: 10.1016/j.fertnstert.2011.05.090
31. Busch K, da Silva SA, Holton M, et al. Sick leave and disability pension in inflammatory bowel disease: a systematic review. *Journal of Crohn's & colitis* 2014;8(11):1362-77. doi: 10.1016/j.crohns.2014.06.006 [published Online First: 2014/07/09]
32. Cash B, Sullivan S, Barghout V. Total costs of IBS: employer and managed care perspective. *The American journal of managed care* 2005;11(1 Suppl):S7-16. [published Online First: 2005/06/02]
33. George R. Bad blood: the taboo on talking about periods is damaging lives *The Guardian* 2016
34. Aufrichtig A. Period pain: why do so many women suffer from menstrual cramps in silence? . *The Guardian* 2016
35. Betts H. The P Word: A last taboo. *The Telegraph* 2013
36. Central Bureau of Statistics C. Statline - Active workforce; duration of labour. (Werkzame beroepsbevolking; arbeidsduur), 2018.

- 1  
2  
3 558 37. Central Bureau of Statistics C. Statline - Sick leave according to employees; gender and age.  
4 559 (Ziekteverzuim volgens werknemers; geslacht en leeftijd), 2017.  
5 560 38. Robinson LL, Ismail KM. Clinical epidemiology of premenstrual disorder: informing optimized  
6 561 patient outcomes. *International journal of women's health* 2015;7:811-8. doi:  
7 562 10.2147/IJWH.S48426  
8 563 39. Giudice LC, Kao LC. Endometriosis. *The Lancet* 2004;364(9447):1789-99. doi: 10.1016/s0140-  
9 564 6736(04)17403-5  
10 565 40. Central Bureau of Statistics C. Statline - People attending the general practitioner; diagnosis, age,  
11 566 gender. (Personen naar bij de huisarts bekende diagnose; leeftijd, geslacht), 2016.  
12 567 41. Central Bureau of Statistics C. Statline - Social monitor, prosperity and weel-being in the Dutch  
13 568 society. (Sociale Monitor, welvaart en welzijn in de Nederlandse samenleving), 2018.  
14 569 42. Whitaker C, Stevelink S, Fear N. The Use of Facebook in Recruiting Participants for Health  
15 570 Research Purposes: A Systematic Review. *J Med Internet Res* 2017;19(8):e290. doi:  
16 571 10.2196/jmir.7071  
17 572 43. Severens JL, Mulder J, Laheij RJ, et al. Precision and accuracy in measuring absence from work as  
18 573 a basis for calculating productivity costs in The Netherlands. *Social science & medicine (1982)*  
19 574 2000;51(2):243-9. [published Online First: 2000/06/01]  
20 575 44. Bouwmans C, De Jong K, Timman R, et al. Feasibility, reliability and validity of a questionnaire on  
21 576 healthcare consumption and productivity loss in patients with a psychiatric disorder (TiC-P).  
22 577 *BMC health services research* 2013;13:217. doi: 10.1186/1472-6963-13-217 [published  
23 578 Online First: 2013/06/19]  
24 579 45. Janda C, Kues JN, Andersson G, et al. A symptom diary to assess severe premenstrual syndrome  
25 580 and premenstrual dysphoric disorder. *Women & health* 2017;57(7):837-54. doi:  
26 581 10.1080/03630242.2016.1206055 [published Online First: 2016/06/30]  
27 582 46. O'Brien PMS, Bäckström T, Brown C, et al. Towards a consensus on diagnostic criteria,  
28 583 measurement and trial design of the premenstrual disorders: the ISPMD Montreal  
29 584 consensus. *Archives of Women's Mental Health* 2011;14(1):13-21. doi: 10.1007/s00737-010-  
30 585 0201-3  
31 586 47. Lee AM, So-Kum Tang C, Chong C. A culturally sensitive study of premenstrual and menstrual  
32 587 symptoms among Chinese women. *J Psychosom Obstet Gynaecol* 2009;30(2):105-14. doi:  
33 588 10.1080/01674820902789241  
34  
35  
36  
37  
38  
39 589  
40  
41  
42  
43  
44  
45  
46  
47  
48  
49  
50  
51  
52  
53  
54  
55  
56  
57  
58  
59  
60

1  
2  
3 590 **Funding statement**  
4  
5

6 591 This research received no specific grant from any funding agency in the public,  
7  
8 592 commercial or not-for-profit sectors.  
9

10  
11 593

12  
13  
14  
15 594 **Competing interest statement**  
16

17  
18 595 All authors have completed the ICMJE uniform disclosure form at  
19  
20 596 [www.icmje.org/coi\\_disclosure.pdf](http://www.icmje.org/coi_disclosure.pdf) and declare: no support from any organisation for  
21  
22 597 the submitted work; no financial relationships with any organisations that might have  
23  
24 598 an interest in the submitted work in the previous three years; no other relationships or  
25  
26 599 activities that could appear to have influenced the submitted work.  
27  
28

29  
30 600

31  
32  
33 601 **Contributorship statement**  
34

35  
36 602 TN, BD and JA conceived the study. MS wrote the first and successive drafts of the  
37  
38 603 manuscript. MS, TN and EA modelled and analysed the data. TN, EA, JM, BD and  
39  
40 604 JA contributed to study conception and design. MS and TN collected the data. All  
41  
42 605 authors revised the manuscript for important intellectual content. MS and TN had full  
43  
44 606 access to the data and take responsibility for the integrity of the data and the  
45  
46 607 accuracy of the data analysis. TN is the guarantor.  
47  
48  
49

50  
51 608

52  
53  
54 609 **Data sharing statement**  
55

56  
57 610 No additional data from this study are available from a repository. Data are available  
58  
59 611 on request from the corresponding author.  
60

1  
2  
3 612 **Acknowledgements**  
4  
5

6 613 The authors would like to thank Reinoud Oomen, Peter de Vroed, Steven Giesbers,  
7  
8 614 Elsbeth Teeling, Paula Kragten and Annemarie Haverkamp for their valuable  
9  
10 615 contributions in the development and dispersion of the questionnaire.  
11  
12  
13

14 616  
15  
16  
17  
18  
19  
20  
21  
22  
23  
24  
25  
26  
27  
28  
29  
30  
31  
32  
33  
34  
35  
36  
37  
38  
39  
40  
41  
42  
43  
44  
45  
46  
47  
48  
49  
50  
51  
52  
53  
54  
55  
56  
57  
58  
59  
60

For peer review only

1  
2  
3 617 **Legends to figures**  
4  
5

6 618  
7  
8

9 619 *Figure 1*  
10  
11

12 620 Flow chart for the respondents.  
13  
14

15 621  
16  
17

18 622 *Figure 2*  
19  
20

21  
22 623 The relationship between pain and intensity scores, related to absenteeism and  
23  
24 624 presenteeism, in lost days per year.  
25  
26

27 625  
28  
29

30 626 *Figure 3*  
31  
32

33 627 The relationship between age and average absenteeism and presenteeism.  
34  
35  
36  
37  
38  
39  
40  
41  
42  
43  
44  
45  
46  
47  
48  
49  
50  
51  
52  
53  
54  
55  
56  
57  
58  
59  
60

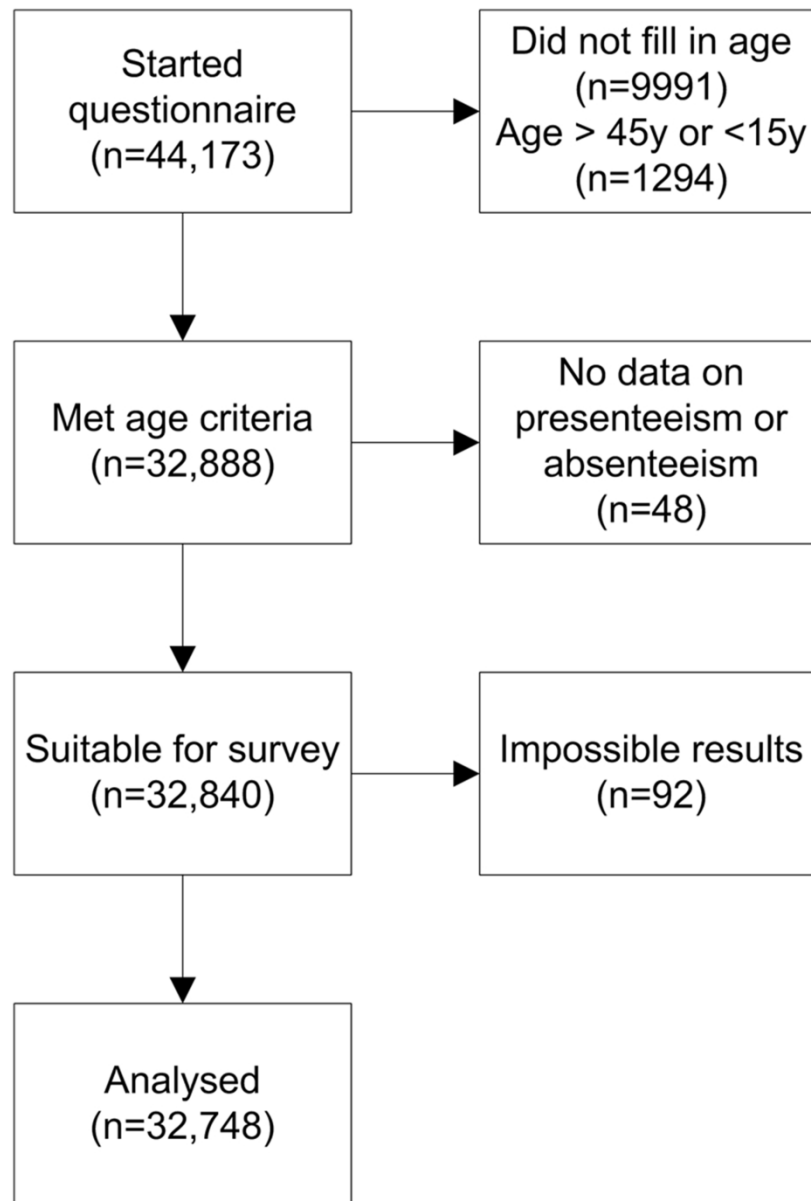

Flow chart for the respondents.

287x423mm (300 x 300 DPI)



1  
2  
3  
4  
5  
6  
7  
8  
9  
10  
11  
12  
13  
14  
15  
16  
17  
18  
19  
20  
21  
22  
23  
24  
25  
26  
27  
28  
29  
30  
31  
32  
33  
34  
35  
36  
37  
38  
39  
40  
41  
42  
43  
44  
45  
46  
47  
48  
49  
50  
51  
52  
53  
54  
55  
56  
57  
58  
59  
60

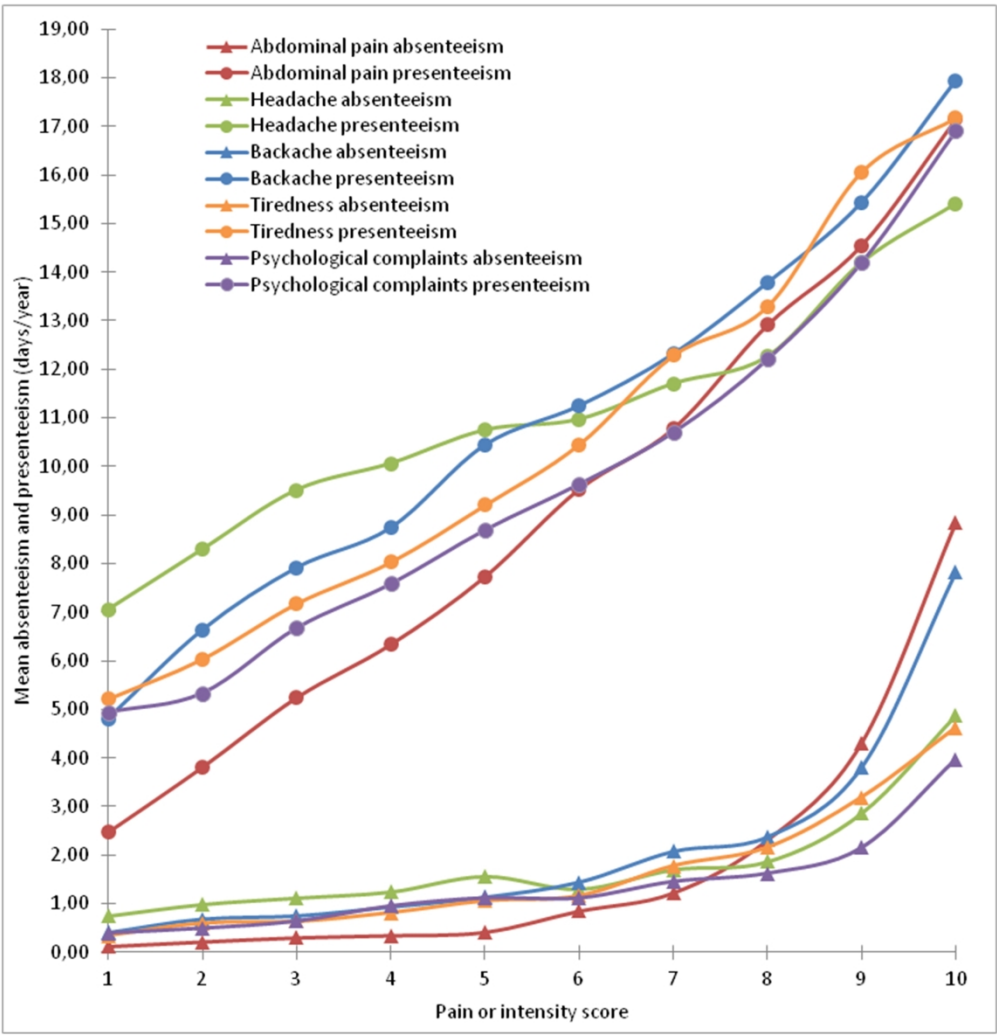

The relationship between pain and intensity scores, related to absenteeism and presenteeism, in lost days per year.

202x209mm (300 x 300 DPI)

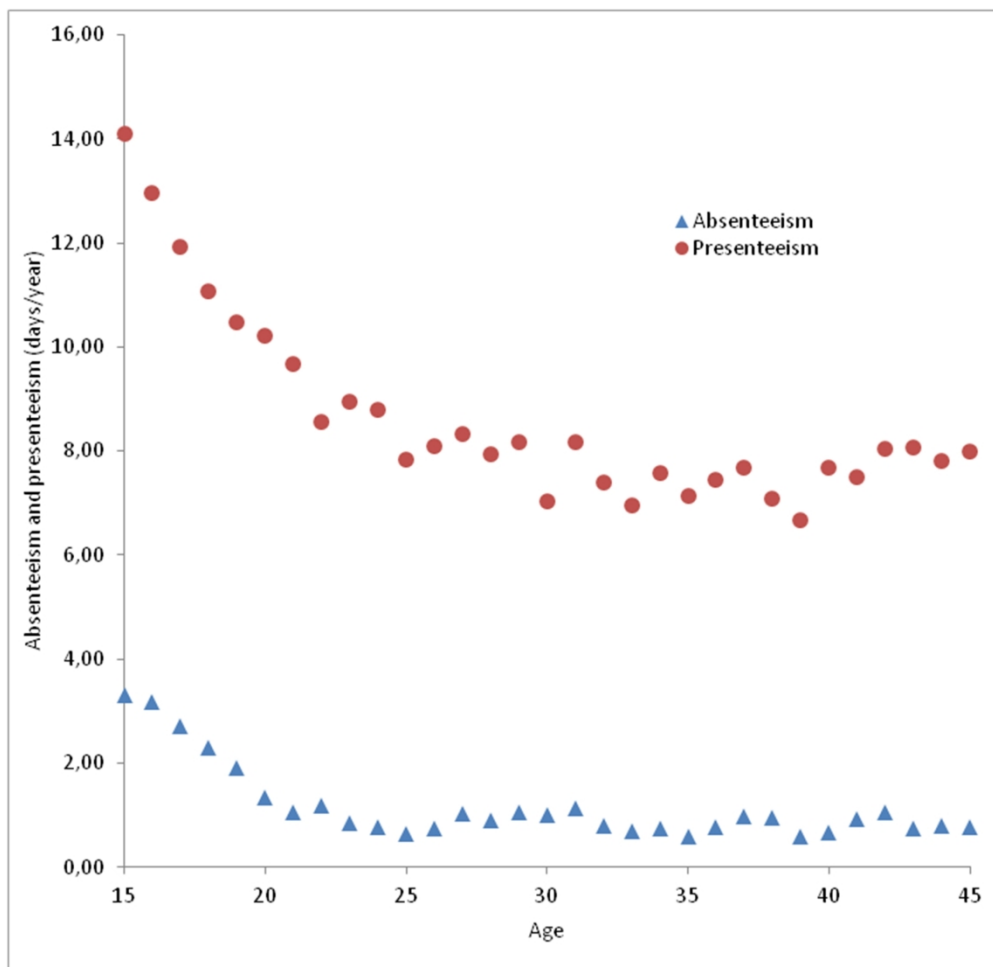

The relationship between age and average absenteeism and presenteeism.

206x199mm (300 x 300 DPI)

## Appendix

### Summary of the questionnaire

#### *Part 1: Questions about basic characteristics*

- Age, marital status, nationality, level of education
- Work, voluntary work and study: hours per week, sector, experienced stress
- Smoking
- Menstrual cycle: total length, number of days with blood loss, number of times needing to change pad or tampon
- Medical and obstetric history
- Contraception use

#### *Part 2: General questions about menstruation-related symptoms*

- Symptoms: abdominal pain, heavy menstrual blood loss, headache, fatigue, backache, nausea and vomiting, tender breasts, problems with stool, psychological complaints
- Per symptom: number of days the symptom was present; number of days that the symptom influenced daily functioning; the magnitude of the symptom's influence on daily functioning; pain or intensity score (not for heavy menstrual bleeding, nausea and vomiting); continuation of daily activities despite symptoms; and the extent to which women forced themselves to continue their daily activities
- Usage of over-the-counter drugs, narcotics, painkillers, alternative medicine

1  
2  
3 *Part 3: Questions related to absenteeism and presenteeism (full text)*  
4  
5

- 6  
7 - How often did you call in sick due to menstrual complaints in the past six months?  
8  
9     ○ Every menstrual cycle  
10  
11     ○ Almost every menstrual cycle  
12  
13     ○ Half of all menstrual cycles  
14  
15     ○ Sometimes  
16  
17     ○ Never  
18  
19  
20  
21  
22  
23 - What is the mean number of days you called in sick due to menstruation-related  
24 symptoms per cycle in the past six months?  
25  
26     ○ More than three days  
27  
28     ○ Three days  
29  
30     ○ Two days  
31  
32     ○ One day  
33  
34     ○ Half a day or a few hours  
35  
36  
37  
38  
39  
40  
41  
42  
43 - What is the number of days you were present at work while being hindered by  
44 menstrual complaints?  
45  
46  
47  
48  
49  
50 - How was your performance during these days?  
51  
52     ○ A Visual Analog Scale by means of sliding a bar was used to score the amount  
53 of productivity loss, where the left end said “I could not do anything” and the  
54 right end said “I could do just as much as I normally do”.  
55  
56  
57  
58  
59  
60

- 1  
2  
3 - What was the number of days you called in sick because of non-menstruation-related  
4  
5 symptoms in the past six months?  
6  
7  
8  
9  
10  
11 - What reason do you give when you call in sick due to menstruation-related  
12 symptoms?  
13  
14  
15     ○ Menstrual complaints  
16  
17     ○ Only the presenting symptom, for example abdominal pain or headache  
18  
19     ○ You do not give a reason  
20  
21     ○ You think up another reason  
22  
23  
24  
25  
26  
27 - What measures would be desirable for women on the workplace or at school during  
28 their menstrual period? It is possible to give more than one answer.  
29  
30  
31     ○ A day off without any consequences  
32  
33     ○ A day off to catch up later  
34  
35     ○ Flexibility to perform less physical work  
36  
37     ○ More time for personal care  
38  
39     ○ The possibility to work from home  
40  
41     ○ None  
42  
43     ○ Not applicable  
44  
45  
46  
47  
48  
49  
50  
51  
52  
53  
54  
55  
56  
57  
58  
59  
60

**STROBE 2007 (v4) Statement—Checklist of items that should be included in reports of *cross-sectional studies***

| Section/Topic                | Item # | Recommendation                                                                                                                                                                       | Reported on page # |
|------------------------------|--------|--------------------------------------------------------------------------------------------------------------------------------------------------------------------------------------|--------------------|
| <b>Title and abstract</b>    | 1      | (a) Indicate the study's design with a commonly used term in the title or the abstract                                                                                               | 2                  |
|                              |        | (b) Provide in the abstract an informative and balanced summary of what was done and what was found                                                                                  | 2                  |
| <b>Introduction</b>          |        |                                                                                                                                                                                      |                    |
| Background/rationale         | 2      | Explain the scientific background and rationale for the investigation being reported                                                                                                 | 4                  |
| Objectives                   | 3      | State specific objectives, including any prespecified hypotheses                                                                                                                     | 5                  |
| <b>Methods</b>               |        |                                                                                                                                                                                      |                    |
| Study design                 | 4      | Present key elements of study design early in the paper                                                                                                                              | 5                  |
| Setting                      | 5      | Describe the setting, locations, and relevant dates, including periods of recruitment, exposure, follow-up, and data collection                                                      | 5-7                |
| Participants                 | 6      | (a) Give the eligibility criteria, and the sources and methods of selection of participants                                                                                          | 6                  |
| Variables                    | 7      | Clearly define all outcomes, exposures, predictors, potential confounders, and effect modifiers. Give diagnostic criteria, if applicable                                             | 8, appendix        |
| Data sources/<br>measurement | 8*     | For each variable of interest, give sources of data and details of methods of assessment (measurement). Describe comparability of assessment methods if there is more than one group | 7-8                |
| Bias                         | 9      | Describe any efforts to address potential sources of bias                                                                                                                            | 7-9                |
| Study size                   | 10     | Explain how the study size was arrived at                                                                                                                                            | 7                  |
| Quantitative variables       | 11     | Explain how quantitative variables were handled in the analyses. If applicable, describe which groupings were chosen and why                                                         | 7-9                |
| Statistical methods          | 12     | (a) Describe all statistical methods, including those used to control for confounding                                                                                                | 7-8                |
|                              |        | (b) Describe any methods used to examine subgroups and interactions                                                                                                                  | 7-8                |
|                              |        | (c) Explain how missing data were addressed                                                                                                                                          | 7,9                |
|                              |        | (d) If applicable, describe analytical methods taking account of sampling strategy                                                                                                   | n/a                |
|                              |        | (e) Describe any sensitivity analyses                                                                                                                                                | n/a                |
| <b>Results</b>               |        |                                                                                                                                                                                      |                    |

|                          |     |                                                                                                                                                                                                              |                                             |
|--------------------------|-----|--------------------------------------------------------------------------------------------------------------------------------------------------------------------------------------------------------------|---------------------------------------------|
| Participants             | 13* | (a) Report numbers of individuals at each stage of study—eg numbers potentially eligible, examined for eligibility, confirmed eligible, included in the study, completing follow-up, and analysed            | 9                                           |
|                          |     | (b) Give reasons for non-participation at each stage                                                                                                                                                         | 9/Figure 1                                  |
|                          |     | (c) Consider use of a flow diagram                                                                                                                                                                           | Figure 1                                    |
| Descriptive data         | 14* | (a) Give characteristics of study participants (eg demographic, clinical, social) and information on exposures and potential confounders                                                                     | 9/Table 1                                   |
|                          |     | (b) Indicate number of participants with missing data for each variable of interest                                                                                                                          | Not reported, can be reported if desirable. |
| Outcome data             | 15* | Report numbers of outcome events or summary measures                                                                                                                                                         | 9-11/Table 2,3                              |
| Main results             | 16  | (a) Give unadjusted estimates and, if applicable, confounder-adjusted estimates and their precision (eg, 95% confidence interval). Make clear which confounders were adjusted for and why they were included | Table 4                                     |
|                          |     | (b) Report category boundaries when continuous variables were categorized                                                                                                                                    | Table 1,4                                   |
|                          |     | (c) If relevant, consider translating estimates of relative risk into absolute risk for a meaningful time period                                                                                             | n/a                                         |
| Other analyses           | 17  | Report other analyses done—eg analyses of subgroups and interactions, and sensitivity analyses                                                                                                               | n/a                                         |
| <b>Discussion</b>        |     |                                                                                                                                                                                                              |                                             |
| Key results              | 18  | Summarise key results with reference to study objectives                                                                                                                                                     | 11-12                                       |
| Limitations              | 19  | Discuss limitations of the study, taking into account sources of potential bias or imprecision. Discuss both direction and magnitude of any potential bias                                                   | 14-15                                       |
| Interpretation           | 20  | Give a cautious overall interpretation of results considering objectives, limitations, multiplicity of analyses, results from similar studies, and other relevant evidence                                   | 12-15                                       |
| Generalisability         | 21  | Discuss the generalisability (external validity) of the study results                                                                                                                                        | 14-15                                       |
| <b>Other information</b> |     |                                                                                                                                                                                                              |                                             |
| Funding                  | 22  | Give the source of funding and the role of the funders for the present study and, if applicable, for the original study on which the present article is based                                                | n/a                                         |

\*Give information separately for cases and controls in case-control studies and, if applicable, for exposed and unexposed groups in cohort and cross-sectional studies.

**Note:** An Explanation and Elaboration article discusses each checklist item and gives methodological background and published examples of transparent reporting. The STROBE checklist is best used in conjunction with this article (freely available on the Web sites of PLoS Medicine at <http://www.plosmedicine.org/>, Annals of Internal Medicine at <http://www.annals.org/>, and Epidemiology at <http://www.epidem.com/>). Information on the STROBE Initiative is available at [www.strobe-statement.org](http://www.strobe-statement.org).

# BMJ Open

## Productivity loss due to menstruation-related symptoms: a nationwide cross-sectional survey among 32,748 women

|                                 |                                                                                                                                                                                                                                                                                                                                                                                                          |
|---------------------------------|----------------------------------------------------------------------------------------------------------------------------------------------------------------------------------------------------------------------------------------------------------------------------------------------------------------------------------------------------------------------------------------------------------|
| Journal:                        | <i>BMJ Open</i>                                                                                                                                                                                                                                                                                                                                                                                          |
| Manuscript ID                   | bmjopen-2018-026186.R2                                                                                                                                                                                                                                                                                                                                                                                   |
| Article Type:                   | Research                                                                                                                                                                                                                                                                                                                                                                                                 |
| Date Submitted by the Author:   | 08-Mar-2019                                                                                                                                                                                                                                                                                                                                                                                              |
| Complete List of Authors:       | Schoep, Mark; Radboudumc, Obstetrics and Gynaecology; Hospital Rijnstate, Obstetrics and Gynaecology<br>Adang, Eddy; Radboudumc, Health Evidence<br>Maas, Jacques; Maxima Medisch Centrum locatie Veldhoven<br>De Bie, Bianca; Dutch Patient Endometriosis Foundation<br>Aarts, Johanna; Radboudumc, Department of Obstetrics & Gynaecology<br>Nieboer, Theodoor; Radboudumc, Obstetrics and Gynaecology |
| <b>Primary Subject Heading</b>: | Obstetrics and gynaecology                                                                                                                                                                                                                                                                                                                                                                               |
| Secondary Subject Heading:      | Health economics, Health policy, Occupational and environmental medicine, Public health                                                                                                                                                                                                                                                                                                                  |
| Keywords:                       | Menstruation, Community gynaecology < GYNAECOLOGY, Menstrual cycle, Presenteeism, Absenteeism                                                                                                                                                                                                                                                                                                            |
|                                 |                                                                                                                                                                                                                                                                                                                                                                                                          |

SCHOLARONE™  
Manuscripts



1  
2  
3 1 **Productivity loss due to menstruation-related symptoms: a nationwide cross-**  
4  
5 2 **sectional survey among 32,748 women**

6  
7  
8 3 **Schoep ME<sup>1</sup>, Adang EMM<sup>2</sup>, Maas JWM<sup>3</sup>, De Bie BLF<sup>4</sup>, Aarts JWM<sup>5</sup>, Nieboer TE<sup>6</sup>**

9  
10  
11 4 1 Mark E Schoep, MD

12  
13  
14 5 Department of Obstetrics and Gynaecology, Radboud University Medical Centre,

15  
16  
17 6 Nijmegen, The Netherlands

18  
19  
20 7  
21  
22  
23 8 Department of Obstetrics and Gynaecology, Rijnstate Hospital, Arnhem, The  
24  
25 9 Netherlands

26  
27  
28  
29 10  
30  
31 11 2 Eddy MM Adang, PhD

32  
33  
34 12 Department for Health Evidence, Radboud University Medical Centre, Nijmegen, The

35  
36  
37 13 Netherlands

38  
39  
40 14  
41  
42  
43 15 3 Jacques WM Maas, MD, PhD

44  
45  
46 16 Department of Obstetrics and Gynaecology, Máxima Medical Centre, Veldhoven, The

47  
48  
49 17 Netherlands

50  
51  
52 18  
53  
54  
55 19 4 Bianca LF De Bie

56  
57  
58 20 Dutch Patient Endometriosis Foundation

59  
60  
21

1  
2  
3 22 <sup>5</sup> Johanna WM Aarts, MD, PhD  
4  
5

6 23 Department of Obstetrics and Gynaecology, Radboud University Medical Centre,  
7  
8 24 Nijmegen, The Netherlands  
9

10  
11 25 <sup>6</sup> Theodoor E Nieboer, MD, PhD; Corresponding author  
12  
13

14 26 Department of Obstetrics and Gynaecology, Radboud University Medical Centre,  
15  
16 27 Nijmegen, The Netherlands  
17  
18

19  
20 28 Geert Grooteplein-Zuid 10, 6500 HB Nijmegen, The Netherlands  
21  
22

23 29 Telephone: +31(0)24-3614792  
24  
25

26 30 E-mail: [Bertho.Nieboer@radboudumc.nl](mailto:Bertho.Nieboer@radboudumc.nl)  
27  
28

29 31  
30

31  
32 32 **Word count:** 4,058  
33  
34

35 33  
36  
37

38 34 **Key Words:** Absenteeism, Presenteeism, Menstrual cycle, Menstruation, Community  
39  
40 35 Gynaecology  
41  
42  
43  
44  
45  
46  
47  
48  
49  
50  
51  
52  
53  
54  
55  
56  
57  
58  
59  
60

## 36 **Abstract**

### 37 Objective

38 To evaluate age-dependent productivity loss caused by menstruation-related  
39 symptoms, measured in absenteeism (time away from work or school) and  
40 presenteeism (productivity loss while present at work/school).

41

### 42 Methods

43 *Design/Setting:* Internet-based, cross-sectional survey conducted in the Netherlands  
44 from July to October 2017.

45 *Participants:* 32,748 women aged 15 to 45 years, recruited through social-media.

46 *Outcome measures:* Self reported lost productivity in days, divided into absenteeism  
47 and presenteeism; impact of menstrual symptoms; reasons women give when calling  
48 in sick; and women's preferences regarding the implications of menstruation related  
49 symptoms for schools and workplaces.

### 50 Results

51 A total of 13.8% (n=4,514) of all women reported absenteeism during their menstrual  
52 periods with 3.4% (n=1,108) reporting absenteeism every or almost every menstrual  
53 cycle. The mean absenteeism related to a woman's period was 1.2 days per year. A  
54 total of 80.7% (n=26,438) of the respondents reported presenteeism and decreased  
55 productivity a mean of 23.2 days per year. An average productivity loss of 33%  
56 resulted in a mean of 8.9 days of total lost productivity per year. Women under 21  
57 were more likely to report absenteeism due to menstruation-related symptoms (OR  
58 3.3, 95% confidence interval 3.1 to 3.6). When women called in sick due to their  
59 periods, only 20.1% (n=908) told their employer or school that their absence was due

1  
2  
3 60 to menstrual complaints. Notably, 67.7% (n=22,154) of the participants wished they  
4  
5 61 had greater flexibility in their tasks and working hours at work or school during their  
6  
7 62 periods.  
8  
9

10  
11 63

## 14 64 Conclusions

16 65 Menstruation-related symptoms cause a great deal of lost productivity, and  
17  
18 66 presenteeism is a bigger contributor to this than absenteeism. There is an urgent  
19  
20 67 need for more focus on the impact of these symptoms, especially in women aged  
21  
22 68 under 21, for discussions of treatment options with women of all ages, and, ideally,  
23  
24 69 more flexibility for women who work or go to school.  
25  
26  
27  
28  
29  
30

31  
32 70

## 31 71 **Strengths and limitations of this study**

- 33  
34  
35 72 • This is the largest cohort study to analyse the impact of menstruation-related  
36  
37 73 symptoms on work and school productivity.  
38  
39 74 • The survey was performed among the general female population and is  
40  
41 75 consequently not per se related to one specific gynaecological condition.  
42  
43 76 • Due to the way of recruitment of participants, there may have been some  
44  
45 77 degree of selection bias.  
46  
47 78 • Outcomes are based on self reported data and consequently lack objectivity  
48  
49 79 regarding productivity loss  
50  
51 80 • The generalisability of the study may be limited to employment and school  
52  
53 81 systems comparable to the Dutch.  
54  
55  
56  
57  
58  
59  
60

## 83 **Background**

84 Menstruation-related symptoms (MRSs) are diverse and widespread among women.  
85 Symptoms include dysmenorrhea, heavy menstrual bleeding and premenstrual mood  
86 disturbances with reported prevalence of 45% to 90%, 14% to 25%, and 20% to 29%  
87 respectively.<sup>1-3</sup> Studies show that women with MRSs have lower scores on several  
88 domains of quality of life such as general health and physical, mental, social, and  
89 occupational functioning during their periods.<sup>1 4-7</sup> Furthermore, these symptoms may  
90 create considerable financial burdens on patients and their families as well as on  
91 society.<sup>5 6 8-12</sup> Such financial burdens are related to the costs of visits to the doctor,  
92 over-the-counter drugs, and medical or surgical treatment. However, costs related to  
93 productivity loss could be the largest cost driver. Productivity costs are defined as  
94 costs associated with paid and unpaid production loss and the replacement of  
95 productive people due to illness or disability.<sup>13</sup> Productivity costs can be divided into  
96 costs related to absenteeism and costs related to presenteeism. Absenteeism  
97 represents the total amount of time off work or away from school, and presenteeism  
98 represents the loss of productivity while present at a job or school.

99 Although the literature is scarce and the results are variable, studies on specific  
100 patient groups generally show that MRSs can cause absenteeism.<sup>14-16</sup> Research on  
101 the association between MRSs and presenteeism is even more limited. It has been  
102 suggested that research into possible impairments in quality of life caused by  
103 menstrual symptoms should not focus on single symptoms but rather on a complex of  
104 symptoms that vary widely but that are all related to the menstrual cycle. This  
105 complex includes both standard symptoms, like heavy menstrual bleeding and  
106 abdominal cramps, and also less common symptoms, like nausea and cold sweats.

107 17 18

1  
2  
3 108 Taking all symptoms into account, it seems likely that the real impact of MRSs is  
4  
5 109 underestimated in the general population. Despite being almost two decades into the  
6  
7 110 21<sup>st</sup> century, discussions about MRSs may still be rather taboo. This survey-based  
8  
9 111 exploratory study aimed to quantify the burden of MRSs in the general female  
10  
11 112 population, with burden defined as the number of lost days at work or school due to  
12  
13 113 absenteeism and presenteeism. Furthermore, it was aimed to study the impact of  
14  
15 114 specific symptoms on absenteeism and presenteeism.  
16  
17  
18  
19  
20 115  
21  
22

## 23 116 **Methods**

24  
25  
26 117 This cross-sectional study consisted of an online survey that was distributed from  
27  
28 118 July 12 to October 11, 2017. Approval for this study was obtained from the local  
29  
30 119 medical ethics committee “Commissie Mensgebonden Onderzoek (CMO)” under  
31  
32 120 number file number 2017-3387 on July 12<sup>th</sup> 2017. All data were anonymously  
33  
34 121 collected and stored under the privacy rules of the Radboud University Medical  
35  
36 122 Center. Patients gave informed consent when they initiated the questionnaire.  
37  
38  
39  
40  
41 123  
42  
43

## 44 124 *Patient and Public Involvement*

45  
46  
47 125 A group of women, among which were several members of the Dutch Patient  
48  
49 126 Endometriosis Foundation, women with a linguistic education and women with a  
50  
51 127 medical origin, was involved in the conduct of this study at several stages; i.e. in the  
52  
53 128 development and dissemination of the questionnaire and in the analysis and  
54  
55 129 interpretation of the results. One of the authors of this manuscript, BD, is the chair of  
56  
57 130 the Dutch Patient Endometriosis Foundation. Additional contributions are noted in the  
58  
59 131 Acknowledgements section.  
60

132

133 *Questionnaire development*

134 The questionnaire had several parts, and Appendix 1 provides details about the  
135 questions. Part 1 consisted of questions about each woman's basic characteristics.  
136 Part 2 had questions about menstrual symptoms, and part 3 had questions related to  
137 absenteeism and presenteeism. Adaptive questioning was used with a maximum of 6  
138 questions per page. Participants were asked in a lay manner how long their  
139 menstrual cycle was and what the exact meaning of a menstrual cycle was. The  
140 duration of the cycle was divided in 5 categories (25 days or less, 26-30 days, 31-35  
141 days, 36-40 days and 41 days or more). Furthermore participants could indicate if  
142 they had an irregular cycle, meaning more than 10 days difference per cycle, if they  
143 were amenorrhic due to the use of an Intra-Uterine Device (IUD) or the continuous  
144 use of oral contraceptives, or the option "I do not know". Additional questions about  
145 absenteeism and presenteeism were included that were based on the Productivity  
146 Cost Questionnaire from the Institute for Medical Technology Assessment (iMTA-  
147 PCQ).<sup>19</sup> We modified the iMTA-PCQ-recommended recall period of four weeks to  
148 three months so that it was in line with the relevant time period for this study and so  
149 we could include multiple menstrual periods. We assumed the amount of  
150 presenteeism to be larger than the amount of absenteeism. Therefore, the recall  
151 period for absenteeism was extended to six months to maintain accuracy. Visual  
152 analogue scales (VAS) were used to quantify the amount of pain, or the intensity of  
153 the symptom, and the impairment due to pain or the other symptom. Presenteeism  
154 was measured by asking women to what extent they were able to be as productive  
155 as possible compared to a day without MRSs. This was scored on a scale from 0 to  
156 10, with 0 being totally unproductive and 10 fully productive. In separate questions,

1  
2  
3 157 participants were asked to quantify their absenteeism that was related to MRSs and  
4  
5 158 absenteeism for any other reason than MRSs. For the latter, we did not specifically  
6  
7 159 ask the underlying reason.  
8  
9

10  
11 160

### 14 161 *Target population and recruitment*

17 162 The study population comprised of women between 15 and 45 years old. The upper  
18  
19 163 age limit was chosen to avoid interference from menopausal symptoms; the lower to  
20  
21 164 have a time margin after the average menarche age, since it is known that the first  
22  
23 165 periods are irregular and often accompanied with discomfort and uncertainty. A large  
24  
25 166 number of women were approached with the aim of obtaining a cohort that was  
26  
27 167 representative of the general female population in terms of level of education,  
28  
29 168 medical history, and/or gynaecological diagnosis. Women were invited to complete a  
30  
31 169 survey using an online questionnaire tool<sup>20</sup> through a campaign on social media  
32  
33 170 platforms Facebook and Twitter. Patient organisations, colleagues, and visitors of the  
34  
35 171 Facebook page of one of the authors (TN) were asked to share the link to the  
36  
37 172 questionnaire in order to reach the widest possible audience.  
38  
39  
40  
41  
42

43 173 On July 12, 2017, a link to the questionnaire was posted on Facebook and Twitter  
44  
45 174 through the account of one of the authors (TN). In the post both women with and  
46  
47 175 without MRSs were encouraged to fill in the questionnaire. Within 24 hours of the first  
48  
49 176 posting on social media, over 6,000 respondents had filled in the questionnaire, and  
50  
51 177 by July 18, there were 15,000 respondents, which was announced by a re-post of the  
52  
53 178 link to the questionnaire. A third post was made on Facebook and Twitter on  
54  
55 179 September 16, 2017, to reach women who may have been on holiday when the first  
56  
57 180 posts were created.  
58  
59  
60



181

182 *Data analysis*

183 The outcome measures were presented in a descriptive way; we used valid  
184 percentages in case of missing values where necessary. We distinguished between  
185 women who were mainly working or mainly studying. Therefore, we present these  
186 data for two groups i.e. for women who worked more than 5 hours per week  
187 (“working group”) and for women who studied more than 5 hours per week (“studying  
188 group”).

189 We used binary logistic regression to calculate odds ratios. Absenteeism and  
190 presenteeism were used as dependant variables. As independent variables we used  
191 the following parameters: women younger than 21 versus women aged 21 and older,  
192 smoking yes or no, reports of absenteeism not related to MRSs, educational level,  
193 the use of oral contraception and the use of an levonorgestrel-releasing intra uterine  
194 device. All independent variables were used in an univariate as well as a multivariate  
195 analysis. We also studied the association between pain scores and both  
196 absenteeism and presenteeism, given that the literature shows that pain scores of 0  
197 to 4, 5 to 6, and 7 or higher have a different impact on activity, mood, and sleep.<sup>21 22</sup>  
198 Analyses were performed using IBM SPSS Statistics version 22.00.

199

200 *Assumptions and transformation of the original data*

201 To present data on level of education in an international format we had to transform  
202 the original data, which was based on the Dutch school system.<sup>23</sup> The categorical  
203 data of participants’ length of menstrual cycle were transformed into averages.

1  
2  
3 204 With regard to the evaluation of absenteeism and presenteeism, “the guideline for  
4  
5 205 economic evaluations in healthcare in the Netherlands” was used.<sup>24</sup> A work-day  
6  
7 206 accounts for 8 hours. For most sectors in the Netherlands, a full-time work-week is 36  
8  
9 207 hours. The maximum amount of working hours per year was set at 1558 when they  
10  
11 208 were working full time. We asked women to report their absenteeism due to MRSs  
12  
13 209 per cycle and used a recall period of six months.  
14  
15  
16

17  
18 210 To calculate the percentages for absenteeism, one day of absenteeism accounted for  
19  
20 211 8 hours of lost productivity. When a woman reported to study or work more than 40  
21  
22 212 hours per week, we transformed these hours to 40 for reasons of clarity in the  
23  
24 213 calculations and comparability with the data of the Dutch Central Bureau of Statistics,  
25  
26 214 CBS. We made a few other transformations for categorical data. For absenteeism  
27  
28 215 related to MRSs, the category “more than three days per cycle” was considered to be  
29  
30 216 4 days per cycle. For absenteeism that was not related to MRSs, the category “more  
31  
32 217 than ten days in the past six months” was considered to be 11 days in the past six  
33  
34 218 months.  
35  
36  
37

38  
39 219 To present yearly data, we multiplied some of these data based on the original recall  
40  
41 220 period. The number of days for absenteeism related to MRSs was based on days per  
42  
43 221 cycle, which were therefore multiplied by 12.7 based on the reported average  
44  
45 222 menstrual cycle of 28.8 days, see table 1. These values were then multiplied by one  
46  
47 223 if the woman reported that she called in sick “every period”, 0.75 if she reported  
48  
49 224 “almost every period”, 0.5 if she reported “half of all periods”, and 0.25 if she reported  
50  
51 225 calling in sick “only once in a while”. Values for absenteeism that was not related to  
52  
53 226 MRS were based on a recall period of 6 months and were therefore multiplied by two  
54  
55 227 in order to obtain the number of days per year. The values for presenteeism were  
56  
57 228 based on a recall period of three months and were therefore multiplied by four.  
58  
59  
60

229

230 **Results**

231 A total of 44,173 women initiated the questionnaire. We excluded participants who  
 232 did not report a date of birth or whose age did not fulfil the inclusion criteria (figure 1).  
 233 There were no duplicates of IP addresses. Women who did not answer questions  
 234 related to absenteeism and presenteeism were excluded. Furthermore, cases with  
 235 impossible results (e.g. 10,000,000 days of presenteeism in three months or 140  
 236 changes of sanitary pads a day) were excluded. This resulted in a total of 32,748  
 237 women in the final analysis.

238 Table 1 summarizes the basic characteristics of the participants. We found that  
 239 45.4% (n=14,839) had visited a doctor for menstrual complaints in the past, with a  
 240 total of 3017 (9.2%) women reporting a diagnosis of a menstrual disorder, such as  
 241 endometriosis or fibroids.

242 The mean age of women in the working group was higher than the mean age of  
 243 women in the studying group. The mean number of working hours per week in the  
 244 working group was 27.0 (SD 11.4), and the mean number of study hours in the  
 245 studying group was 27.4 (SD 12.1). A total of 7,335 women (22.4%) reported both  
 246 working and studying more than five hours per week. In this group, 3,001 women  
 247 were working more than 16 hours a week, and 5,284 women in the study group were  
 248 studying more than 16 hours a week.

|                   | Number<br>(percentage) | Mean $\pm$ SD  | Median |
|-------------------|------------------------|----------------|--------|
| <b>Age, years</b> |                        | 28.6 $\pm$ 8.6 | 28     |
| <b>15-19</b>      | 6,141 (18.8%)          |                |        |
| <b>20-24</b>      | 6,118 (18.7%)          |                |        |

|                                                   |                |           |    |
|---------------------------------------------------|----------------|-----------|----|
| <b>25-29</b>                                      | 5,825 (17.8%)  |           |    |
| <b>30-34</b>                                      | 5,483 (16.7%)  |           |    |
| <b>35-40</b>                                      | 4,687 (14.3%)  |           |    |
| <b>41-45</b>                                      | 4,494 (13.7%)  |           |    |
| <b>Level of education</b>                         |                |           |    |
| <b>Low</b>                                        | 4,020 (12.3%)  |           |    |
| <b>Medium</b>                                     | 12,335 (37.9%) |           |    |
| <b>High</b>                                       | 16,229 (49.8%) |           |    |
| <b>Hours/week</b>                                 |                |           |    |
| <b>Paid work</b>                                  |                | 21.7±14.7 | 24 |
| <b>Study</b>                                      |                | 7.4±13.6  | 0  |
| <b>Voluntary work</b>                             |                | 0.8±3.1   | 0  |
| <b>Menstrual cycle</b>                            |                |           |    |
| <b>Regular cycle</b>                              | 25,717 (78.5%) |           |    |
| <b>Duration</b>                                   |                | 28.8±3.0  | 28 |
| <b>Amenorrhoea due to LG-IUD/OC</b>               | 3,675 (11.2%)  |           |    |
| <b>Irregular, variation &gt;10 days per cycle</b> | 2,495 (7.6%)   |           |    |
| <b>Do not know</b>                                | 861 (2.6%)     |           |    |
| <b>Days with blood loss per cycle</b>             |                | 5.4±1.6   | 5  |
| <b>Visited a doctor for MRSs</b>                  |                |           |    |
| <b>No</b>                                         | 17,873 (54.6%) |           |    |
| <b>Yes, general practitioner</b>                  | 10,141 (31.0%) |           |    |
| <b>Yes, gynaecologist</b>                         | 4,698 (14.4%)  |           |    |
| <b>Diagnosis for MRSs*</b>                        |                |           |    |
| <b>No</b>                                         | 29,731 (90.8%) |           |    |
| <b>Yes</b>                                        | 3,017 (9.2%)   |           |    |
| <b>Endometriosis</b>                              | 1,120 (3.4%)   |           |    |
| <b>PCOS</b>                                       | 588 (1.8%)     |           |    |
| <b>Adenomyosis</b>                                | 103 (0.3%)     |           |    |

|                                                    |                |           |    |
|----------------------------------------------------|----------------|-----------|----|
| <b>Fibroids</b>                                    | 275 (0.8%)     |           |    |
| <b>Other</b>                                       | 1,901 (5.8%)   |           |    |
| <b>Contraception*</b>                              |                |           |    |
| <b>Hormonal contraception</b>                      | 11,993 (36.6%) |           |    |
| <b>OC</b>                                          | 8,650 (26.4%)  |           |    |
| <b>LG-IUD</b>                                      | 2,752 (8.4%)   |           |    |
| <b>Other hormonal: injection, transdermal etc.</b> | 882 (2.7%)     |           |    |
| <b>No hormonal contraception</b>                   | 20,755 (63.4%) |           |    |
| <b>Cu-IUD</b>                                      | 771 (2.4%)     |           |    |
| <b>Female sterilisation</b>                        | 423 (1.3%)     |           |    |
| <b>No female contraception</b>                     | 19,639 (60.0%) |           |    |
| <b>Nulliparous</b>                                 | 21,585 (66.0%) |           |    |
| <b>Paid work &gt;5 hr a week</b>                   | 26,104 (79.7%) |           |    |
| <b>Age</b>                                         |                | 29.7±8.3  | 29 |
| <b>Hours of paid work/week</b>                     |                | 27.0±11.4 | 28 |
| <b>Hours spent on study/week</b>                   |                | 7.5±13.4  | 0  |
| <b>&gt;40 hours of paid work/week</b>              | 1,047 (3.2%)   |           |    |
| <b>Study &gt;5 hr a week</b>                       | 8,764 (26.8%)  |           |    |
| <b>Age</b>                                         |                | 22.0±6.2  | 20 |
| <b>Hours spent on study/week</b>                   |                | 27.4±12.1 | 30 |
| <b>Hours of paid work/week</b>                     |                | 15.5±11.3 | 12 |
| <b>&gt;40 hours spent on study/week</b>            | 322 (1.0%)     |           |    |

249

250 Table 1 | Basic characteristics of study participants (n=32,748) Mean duration of  
 251 cycle based on women with a regular cycle. SD = standard deviation, MRSs =  
 252 menstruation-related symptoms, PCOS = polycystic ovary syndrome, OC = oral  
 253 contraceptive, LG-IUD = levonorgestrel-releasing intrauterine device, Cu-IUD =  
 254 copper intrauterine device. \*More than one answer possible.

255

256 *Absenteeism*

1  
2  
3 257 Table 2 shows the results on absenteeism due to MRSs. Although 13.8% of the  
4  
5 258 women (n=4,514) reported absenteeism due to MRSs, only 1,108 women (3.4%)  
6  
7 259 reported absenteeism every cycle or almost every cycle. The percentage of  
8  
9 260 absenteeism in every cycle or almost every cycle was 2.4% in the working group and  
10  
11 261 4.5% in the studying group. The mean absenteeism due to MRSs was 0.9 days per  
12  
13 262 year for the working group and 1.6 day per year for the study group.  
14  
15  
16

17  
18 263 We also calculated the mean total absenteeism that was not related to MRSs. For the  
19  
20 264 entire group, this was 3.3 days per year; for the working group, it was 3.5 days, and  
21  
22 265 for the studying group, it was 4.3 days. The mean percentage of absenteeism that  
23  
24 266 was not related to MRSs was 3.5% in the working group and 3.7% in the studying  
25  
26 267 group. Consequently, absenteeism due to MRSs in our cohort accounted for, on  
27  
28 268 average, 22% of the total absenteeism in the working group and 24% in the studying  
29  
30 269 group.  
31  
32  
33

34  
35 270  
36  
37  
38  
39  
40  
41  
42  
43  
44  
45  
46  
47  
48  
49  
50  
51  
52  
53  
54  
55  
56  
57  
58  
59  
60

|                                           | Number<br>(percentage) | Mean $\pm$ SD |
|-------------------------------------------|------------------------|---------------|
| <b>All (n=32,748)</b>                     |                        |               |
| <b>Absenteeism</b>                        | 4,514 (13.8)           |               |
| $\leq 0.5$ day                            | 538 (1.6%)             |               |
| 1 day                                     | 2,259 (6.9%)           |               |
| 2 days                                    | 1,171 (3.6%)           |               |
| 3 days                                    | 349 (1.1%)             |               |
| >3 days                                   | 184 (0.6%)             |               |
| <b>Total days of absenteeism per year</b> |                        | 1.3 $\pm$ 5.9 |
| <b>Work (n=26,104)</b>                    |                        |               |
| <b>Absenteeism</b>                        | 2,926 (11.2%)          |               |
| $\leq 0.5$ day                            | 374 (1.4%)             |               |
| 1 day                                     | 1,476 (5.7%)           |               |
| 2 days                                    | 757 (2.9%)             |               |
| 3 days                                    | 211 (0.8%)             |               |
| >3 days                                   | 98 (0.4%)              |               |
| <b>Total days of absenteeism per year</b> |                        | 0.9 $\pm$ 3.9 |
| <b>Study (n=8,764)</b>                    |                        |               |
| <b>Absenteeism</b>                        | 1,715 (19.6%)          |               |
| $\leq 0.5$ day                            | 234 (2.7%)             |               |
| 1 day                                     | 921 (10.5%)            |               |
| 2 days                                    | 423 (4.8%)             |               |
| 3 days                                    | 92 (1.0%)              |               |
| >3 days                                   | 41 (0.5%)              |               |
| <b>Total days of absenteeism per year</b> |                        | 1.6 $\pm$ 5.0 |

271

272 Table 2 | Reported absenteeism caused by menstruation-related symptoms. Women  
 273 were asked to report the average amount of days on which they were absent due to  
 274 menstruation-related symptoms per cycle. The total days of absenteeism per year

275 was calculated. The added numbers of women in the work and study group exceed  
 276 the total amount of participants, since 2,120 women reported to both study and work  
 277 more than 5 hours/week. SD = standard deviation

278

### 279 *Presenteeism*

280 Table 3 shows the numbers reported for presenteeism. Over 80% of all women  
 281 reported presenteeism during their periods. The differences between the working  
 282 group and the study group were not large in terms of prevalence and lost productivity.  
 283 The mean number of lost productive days per year due to presenteeism was more  
 284 than seven-fold greater than the mean number of lost productive days due to  
 285 absenteeism.

|                                                | Number<br>(percentage) | Mean $\pm$ SD   | Median |
|------------------------------------------------|------------------------|-----------------|--------|
| <b>All (n=32,748)</b>                          |                        |                 |        |
| <b>Presenteeism</b>                            | 26,438<br>(80.7%)      |                 |        |
| <b>Number of days in the past 3 months</b>     |                        | 5.8 $\pm$ 5.3   | 5.0    |
| <b>Percentage of productivity loss per day</b> |                        | 33.0 $\pm$ 24.8 | 30.0   |
| <b>Days/year of lost productivity</b>          |                        | 8.9 $\pm$ 11.0  | 5.6    |
| <b>Work (n=26,104)</b>                         |                        |                 |        |
| <b>Presenteeism</b>                            | 21,252<br>(81.4%)      |                 |        |
| <b>Number of days in the past 3 months</b>     |                        | 5.7 $\pm$ 5.2   | 5.0    |
| <b>Percentage of productivity loss per day</b> |                        | 31.7 $\pm$ 24.7 | 30.0   |
| <b>Days/year of lost productivity</b>          |                        | 8.4 $\pm$ 10.6  | 4.8    |
| <b>Study (n=8,764)</b>                         |                        |                 |        |
| <b>Presenteeism</b>                            | 7,385 (84.3%)          |                 |        |
| <b>Number of days in the past 3 months</b>     |                        | 6.3 $\pm$ 5.3   | 5.0    |
| <b>Percentage of productivity loss per day</b> |                        | 36.8 $\pm$ 24.2 | 40.0   |



|                                       |  |           |     |
|---------------------------------------|--|-----------|-----|
| <b>Days/year of lost productivity</b> |  | 10.5±11.8 | 7.2 |
|---------------------------------------|--|-----------|-----|

286

287 Table 3 | Reported presenteeism caused by menstruation-related symptoms. Women  
 288 were asked to report the amount of days on which they were less productive and to  
 289 what extent. The total days of lost productivity per year was calculated. The added  
 290 numbers of women in the work and study group exceed the total amount of  
 291 participants, since 2,120 women reported to both study and work more than 5  
 292 hours/week. SD = standard deviation

293

### 294 *Factors associated with absenteeism and presenteeism*

295 Figure 2 shows the association between reported pain or discomfort scores and both  
 296 absenteeism and presenteeism. As seen in detail in table 4, high VAS scores were  
 297 significantly associated with higher levels of absenteeism and presenteeism. The  
 298 strongest relationship was found for abdominal pain scores that were 7 or higher on a  
 299 scale from 0 to ten. Odds ratios were 5.6 for absenteeism (95% confidence interval:  
 300 5.0 to 6.2) and 8.8 for presenteeism (95% confidence interval: 8.1 to 9.5). Figure 3  
 301 shows the association between age and both presenteeism and absenteeism. As  
 302 shown in both figure 3 and table 4, we found that younger women showed  
 303 significantly higher rates of absenteeism and presenteeism. A levonorgestrel–  
 304 releasing intrauterine device is associated with especially less presenteeism.

|                                                                           | Absenteeism   |                              | Presenteeism  |                              |
|---------------------------------------------------------------------------|---------------|------------------------------|---------------|------------------------------|
|                                                                           | OR (95% CI)   | OR after correction (95% CI) | OR (95% CI)   | OR after correction (95% CI) |
| <b>Age&lt;21 years<sup>a</sup></b>                                        | 3.7 (3.4-3.9) | 3.3 (3.1-3.6)                | 1.4 (1.3-1.5) | 1.3 (1.2-1.4)                |
| <b>Smoking<sup>b</sup></b>                                                | 1.3 (1.2-1.5) | 1.3 (1.2-1.4)                | 1.5 (1.3-1.6) | 1.4 (1.3-1.6)                |
| <b>Absenteeism not related to MRSs in the past six months<sup>c</sup></b> | 2.2 (2.1-2.4) | 1.7 (1.6-1.9)                | 1.4 (1.3-1.5) | 1.3 (1.2-1.4)                |
| <b>Level of education<sup>d</sup></b>                                     |               |                              |               |                              |

|                                              |        |               |                 |               |                |
|----------------------------------------------|--------|---------------|-----------------|---------------|----------------|
|                                              | Low    | 4.5 (4.1-4.9) | 2.7 (2.4-3.0)   | 1.3 (1.2-1.4) | 1.1 (1.0-1.2)* |
|                                              | Medium | 2.2 (2.1-2.4) | 1.7 (1.5-1.8)   | 1.3 (1.2-1.4) | 1.2 (1.1-1.2)  |
|                                              | High   | 1.0 (n/a)     | 1.0 (n/a)       | 1.0 (n/a)     | 1.0 (n/a)      |
| <b>Oral contraception<sup>e</sup></b>        |        |               |                 |               |                |
|                                              | No     | 1.0 (n/a)     | 1.0 (n/a)       | 1.0 (n/a)     | 1.0 (n/a)      |
|                                              | Yes    | 1.2 (1.1-1.3) | 1.0 (0.9-1.1)** | 0.9 (0.9-1.0) | 0.9 (0.8-0.9)  |
| <b>LG-IUD<sup>e</sup></b>                    |        |               |                 |               |                |
|                                              | No     | 1.0 (n/a)     | 1.0 (n/a)       | 1.0 (n/a)     | 1.0 (n/a)      |
|                                              | Yes    | 0.7 (0.6-0.8) | 0.9 (0.8-1.0)   | 0.5 (0.5-0.6) | 0.5 (0.5-0.6)  |
| <b>Abdominal pain score<sup>e</sup></b>      |        |               |                 |               |                |
|                                              | 0-4    | 1.0 (n/a)     | 1.0 (n/a)       | 1.0 (n/a)     | 1.0 (n/a)      |
|                                              | 5-6    | 2.6 (2.3-2.9) | 2.2 (1.9-2.4)   | 5.2 (4.8-5.7) | 5.3 (4.9-5.7)  |
|                                              | >7     | 7.0 (6.4-7.8) | 5.6 (5.0-6.2)   | 8.7 (8.0-9.4) | 8.8 (8.1-9.5)  |
| <b>Headache pain score<sup>e</sup></b>       |        |               |                 |               |                |
|                                              | 0-4    | 1.0 (n/a)     | 1.0 (n/a)       | 1.0 (n/a)     | 1.0 (n/a)      |
|                                              | 5-6    | 1.5 (1.3-1.6) | 1.5 (1.4-1.6)   | 3.0 (2.7-3.3) | 3.1 (2.8-3.4)  |
|                                              | >7     | 2.0 (1.8-2.1) | 2.3 (2.1-2.5)   | 3.5 (3.2-3.9) | 3.7 (3.4-4.1)  |
| <b>Backache pain score<sup>e</sup></b>       |        |               |                 |               |                |
|                                              | 0-4    | 1.0 (n/a)     | 1.0 (n/a)       | 1.0 (n/a)     | 1.0 (n/a)      |
|                                              | 5-6    | 1.6 (1.5-1.7) | 1.4 (1.3-1.5)   | 3.5 (3.2-3.9) | 3.5 (3.2-3.8)  |
|                                              | >7     | 2.7 (2.5-2.9) | 2.2 (2.1-2.4)   | 4.7 (4.2-5.2) | 4.5 (4.0-5.0)  |
| <b>Tiredness intensity score<sup>e</sup></b> |        |               |                 |               |                |
|                                              | 0-4    | 1.0 (n/a)     | 1.0 (n/a)       | 1.0 (n/a)     | 1.0 (n/a)      |
|                                              | 5-6    | 1.8 (1.7-2.0) | 1.8 (1.6-2.0)   | 3.3 (3.1-3.6) | 3.3 (3.1-3.6)  |
|                                              | >7     | 3.0 (2.8-3.2) | 2.8 (2.6-3.1)   | 5.1 (4.7-5.6) | 5.2 (4.7-5.7)  |
| <b>Psychological complaints intensity</b>    |        |               |                 |               |                |

| score <sup>e</sup> |     |               |               |               |               |
|--------------------|-----|---------------|---------------|---------------|---------------|
|                    | 0-4 | 1.0 (n/a)     | 1.0 (n/a)     | 1.0 (n/a)     | 1.0 (n/a)     |
|                    | 5-6 | 1.6 (1.5-1.7) | 1.5 (1.4-1.7) | 2.7 (2.5-2.9) | 2.6 (2,5-2.9) |
|                    | >7  | 2.2 (2.0-2.4) | 2.1 (2.0-2.3) | 4.4 (4.0-4.7) | 4.3 (4.0-4.7) |

305

306 Table 4 | Odd ratios (ORs) and 95% confidence intervals (95% CIs) for factors  
 307 related to absenteeism and presenteeism. ORs >1 correlate with a higher prevalence  
 308 of absenteeism or presenteeism. ORs <1 correlate with a lower prevalence of  
 309 absenteeism or presenteeism.

310 LG-IUD = Levonorgestrel-releasing intra uterine device

311 <sup>a</sup>Correction for smoking and absenteeism that was not related to menstruation-

312 related symptoms (MRSs); <sup>b</sup>Correction for age, absenteeism that was not related to

313 MRSs, and level of education; <sup>c</sup>Correction for age, smoking, and level of education;

314 <sup>d</sup>Correction for age, smoking, and absenteeism that was not related to MRSs;

315 <sup>e</sup>Correction for age, smoking, absenteeism that was not related to MRSs, and level of

316 education. \*p=0.26, \*\*p=0,73 For all other ORs, p<0.05

317

### 318 *Menstruation and suggested implications for schools and workplaces*

319 From the respondent who had been calling in sick due to MRSs, 20.1% (n=908) told  
 320 their employer or school menstrual symptoms were the reason, 46.4% (n=2092) only  
 321 mentioned the presenting symptom. No reason was given by 27.7% (n=1250), while  
 322 5.8% (n=260) made up another reason. Comparing women aged below 21 with  
 323 women aged 21 and above, we found that younger women were less open about  
 324 their MRSs being the reason for calling in sick (12.0%) versus women older than 21  
 325 (27.0%). Women were asked to report suggestions on how work places and  
 326 conditions could be changed in order for them to function better during their  
 327 menstrual periods. There were 32,708 responses to this multiple-choice question, to  
 328 which each woman could give more than one answer. The majority of women

1  
2  
3 329 (67.7%, n=22,154) preferred more flexibility during their periods, such as the  
4  
5 330 possibility of doing less physical work (32.1%, n=10,499), the ability to work from  
6  
7 331 home (39.5%, n=12,917), more time for personal care (28.3%, n=9,241), or the ability  
8  
9 332 to take a day off and make up for it later (11.5%, n=3,756). In addition, 32.9% wished  
10  
11 333 they could take a complete day off without any consequences. 27.2% (n=8,890) did  
12  
13 334 not wish for any changes in policy. Many women (79.7%, n=26,072) were open to  
14  
15 335 discussing MRSs with their company doctor, and 56.7% (n=18,579) thought that  
16  
17 336 doing so would draw more attention to MRS-related matters.  
18  
19  
20  
21  
22  
23  
24  
25  
26  
27  
28  
29  
30  
31  
32  
33  
34  
35  
36  
37  
38  
39  
40  
41  
42  
43  
44  
45  
46  
47  
48  
49  
50  
51  
52  
53  
54  
55  
56  
57  
58  
59  
60

## 337 **Discussion**

338 This survey-based study showed that menstruation-related absenteeism and, to a  
339 greater extent, presenteeism are widespread in the general female population. In our  
340 cohort, MRSs accounted for up to 24% of total absenteeism for women who were  
341 working and studying. The annual productivity loss due to presenteeism was seven-  
342 fold times more than the annual productivity loss due to absenteeism and women  
343 younger than 21 years experience the largest burden. Symptom severity scores  
344 showed significant and strong associations with both absenteeism and presenteeism.  
345 When women called in sick due to MRSs, only one in five stated openly that  
346 menstrual symptoms were the main reason. A majority of women prefers more  
347 flexibility during their periods when it comes to work or school.

348 There have been few studies on absenteeism and presenteeism related to MRSs in  
349 the general female population. To our knowledge, Tanaka's study<sup>25</sup> is the only other  
350 published study on absenteeism and presenteeism due to MRSs in the general  
351 female population. In a cohort of 19,254 Japanese women, a total of 3,311 (17.2%)  
352 reported work productivity lost in the prior 3 months, mostly in the form of decreased  
353 efficiency (62.0%, n=2,052). Of these 2,052 subjects, the mean number of workdays  
354 lost due to decreased efficiency was 5.7 days in 3 months. After recalculation, this  
355 accounts for 2.4 days per year for the entire population. This is fewer days than the  
356 8.9 days per year in our cohort. On the other hand, the numbers for absenteeism  
357 were more similar, with a mean of 1.0 day of absenteeism per year in the entire  
358 Japanese cohort compared to 1.2 days in our cohort. Differences in regulations of  
359 social services, a difference in attitude towards sick leave and a different method of  
360 data collection might explain these differences. It has been suggested in research on  
361 musculoskeletal symptoms that rates of absenteeism might be lower in Japan

1  
2  
3 362 compared to European countries and the United States. Consequently, presenteeism  
4  
5 363 might therefore be a more representative variable.<sup>26 27</sup>  
6  
7

8 364 More data are available regarding the impact of dysmenorrhoea on quality of life and  
9  
10 365 absenteeism. De Sanctis et al. reviewed studies on dysmenorrhea in multiple  
11  
12 366 countries, some of which included menstruation-related absenteeism data. They  
13  
14 367 found that the prevalence of school absences in adolescents that was due to  
15  
16 368 dysmenorrhea varied between 7.7% and 57.8%. Since the review included 41,140  
17  
18 369 women in 27 countries, and there was a high degree of heterogeneity in the outcome  
19  
20 370 measures, no firm conclusions could be drawn. Hailemeskel et al. evaluated 440  
21  
22 371 female university students in Ethiopia.<sup>28</sup> Among students with dysmenorrhea, 66.8%  
23  
24 372 reported a loss of concentration in class, and 56.3% reported class absences during  
25  
26 373 the last month. In a questionnaire-based study of 706 Hispanic female adolescents,  
27  
28 374 38% reported missing school due to dysmenorrhea during the 3 months prior to the  
29  
30 375 survey, and 59% reported a decrease in concentration in class due to dysmenorrhea.  
31  
32 376 <sup>29</sup>  
33  
34  
35  
36  
37  
38

39 377 Absenteeism and presenteeism due to endometriosis in other studies was greater  
40  
41 378 than in our study, which was not surprising.<sup>9 14 30</sup> However, some interesting parallels  
42  
43 379 can be drawn to findings from a recent study by Soliman et al.<sup>14</sup> They found that the  
44  
45 380 average number of hours of presenteeism, 5.3 hours per week, was far greater than  
46  
47 381 the number of hours of absenteeism, which was 1.1 hours per week. Furthermore,  
48  
49 382 younger women had significantly higher levels of lost productivity than their older  
50  
51 383 counterparts, and more severe symptoms were associated with more absenteeism  
52  
53 384 and presenteeism. This was in line with our findings, since we also found higher rates  
54  
55 385 of both absenteeism and presenteeism in younger women. A taboo on talking openly  
56  
57 386 about MRS, under-treatment and less flexibility at school might be possible  
58  
59  
60

1  
2  
3 387 explanations for these differences. Comparing our outcomes with studies on other  
4  
5 388 non-gynaecological conditions is hard due to differences in methods and  
6  
7 389 presentation of findings and the cyclic character of MRSs. However, the incidence of  
8  
9  
10 390 presenteeism seems to be as high as it is in patients with inflammatory bowel  
11  
12 391 disease.<sup>31</sup> Moreover, the amount of impairment is comparable with severe  
13  
14 392 gastroesophageal reflux (31.9%) , moderate irritable bowel syndrome (36.6%) and  
15  
16 393 allergic rhinitis (33.4%-39.8%).<sup>32</sup>

17  
18  
19  
20 394 Our finding that only 20.1% of women were open about their menstrual symptoms as  
21  
22 395 a reason for calling in sick may confirm the general idea that women tend not to  
23  
24 396 speak openly about MRSs. Wong et al. found that in a cohort of schoolgirls in  
25  
26 397 Malaysia, 76.1% considered dysmenorrhoea a normal part of the menstrual cycle.<sup>15</sup>  
27  
28 398 In the context of the findings noted above, our study also suggests there is a taboo  
29  
30 399 for women in terms of discussing menstrual problems with their employers. The latter  
31  
32 400 may therefore conclude that the impact of MRSs on their employees is negligible.  
33  
34 401 Considering the fact that we also found that 68% of women wish that they had  
35  
36 402 greater flexibility during their periods, either at school or at work, more openness  
37  
38 403 about MRSs in the employment setting seems desirable. The reasons underlying this  
39  
40 404 taboo are likely to have a historical basis; indeed, since ancient times, menstruation  
41  
42 405 has been surrounded with mythical stories and has not been well understood.  
43  
44 406 However, in recent years, the lay literature in developed countries has focused more  
45  
46 407 attention on MRSs. <sup>33-35</sup> The prevalence and the impact of MRSs on the general  
47  
48 408 population and the number of women who are asking for a different approach all  
49  
50 409 reflect the need to change the view of menstrual symptoms and the way they are  
51  
52 410 addressed in society.  
53  
54  
55  
56  
57  
58  
59  
60

1  
2  
3 411 This study consisted of a large cohort, and it reached a large number of women  
4  
5 412 within the age range that was aimed for. The questionnaire was developed in  
6  
7 413 collaboration with patient representatives to make it understandable by and relevant  
8  
9 414 to most women. The cohort appeared to be a representative sample of the general  
10  
11 415 female population based on the number of working hours.<sup>33</sup> When we compare our  
12  
13 416 data with the national registries the total amount of absenteeism is found to be  
14  
15 417 comparable, regardless of whether it was related to MRSs.<sup>36 37</sup> It is difficult to  
16  
17 418 compare our numbers on women with a diagnosis explaining their MRSs with  
18  
19 419 numbers found in other studies. We found that only 9% of the participants had such a  
20  
21 420 diagnosis, which seems about as expected or even somewhat low.<sup>3 38-40</sup> In contrast,  
22  
23 421 45% of the women in the study reported consulting a physician for their MRSs. This  
24  
25 422 number was relatively high compared to other studies in which, for example, the  
26  
27 423 percentage of women with dysmenorrhoea who sought medical advice was  
28  
29 424 approximately 15%.<sup>15 16</sup> An important factor might be the Dutch health system in  
30  
31 425 which general practitioners are available free of charge. Women with a low level of  
32  
33 426 education were relatively underrepresented.<sup>41</sup> As our results show, especially  
34  
35 427 absenteeism related to MRSs is associated with a low level of education, and this  
36  
37 428 might have biased our results. We expect women with lower educational levels to do  
38  
39 429 more physical jobs or jobs with less flexibility. Therefore, our findings on work  
40  
41 430 productivity loss might be underestimated. On the other hand, our finding could be  
42  
43 431 overestimated due to the possibility that women with more MRSs might be more  
44  
45 432 likely to respond to a questionnaire, as it may seem more relevant to them. Moreover,  
46  
47 433 we were not able to provide data on presenteeism not related to MRSs nor were we  
48  
49 434 able to correct for comorbid health conditions. Thus, these results must be  
50  
51 435 interpreted with caution. Due to the way that the questionnaire was distributed  
52  
53 436 through social media, there may have been some selection bias. However, a recent



1  
2  
3 437 review stated that Facebook is a useful recruitment tool for healthcare research.<sup>42</sup>  
4  
5 438 Although we did not use a validated questionnaire, our most important outcomes  
6  
7 439 were based on questions derived from the PCQ, which itself is based on validated  
8  
9 440 questions and which is recommended by guidelines for cost research.<sup>24</sup> Self-reported  
10  
11 441 absenteeism generally shows a good correlation with official records, although  
12  
13 442 accuracy decreases with increasing recall period.<sup>43</sup> This might have initiated a recall  
14  
15 443 bias in our cohort. It is unknown to what extent recall bias affects reports on  
16  
17 444 presenteeism.<sup>44</sup> In general, although results vary among studies on premenstrual  
18  
19 445 complaints, a prospective collection of data on symptoms is advisable.<sup>45 46</sup>  
20  
21 446 Furthermore, an extrapolation of a three and six months timeframe to a yearly basis  
22  
23 447 may intrinsically imply some degree of uncertainty, for example when the influenza  
24  
25 448 season is not included in the original analysis. Finally, these results may not be  
26  
27 449 generalized internationally due to variability in the regulation of social services in  
28  
29 450 different countries, and this is also a limitation of our study. In The Netherlands,  
30  
31 451 wages are paid during sick leave that has duration of less than 1 year, but women in  
32  
33 452 other countries may not have this benefit. Since we know that many factors influence  
34  
35 453 menstrual symptoms, including biological, cultural, and environmental factors, these  
36  
37 454 differences might well influence both absenteeism and presenteeism.<sup>6 14 47</sup>  
38  
39  
40  
41  
42  
43  
44  
45 455 In conclusion, we have found that the impact of MRSs on work and school  
46  
47 456 productivity is considerable and that presenteeism contributes significantly more to  
48  
49 457 the matter than absenteeism. Future research should identify how women affected by  
50  
51 458 MRSs could be helped best and how their productivity can be improved in order to  
52  
53 459 reduce the societal impact regarding absenteeism and presenteeism.  
54  
55  
56  
57  
58 460  
59  
60

461 **References**

- 462 1. Iacovides S, Avidon I, Baker FC. What we know about primary dysmenorrhea  
463 today: a critical review. *Hum Reprod Update* 2015;21(6):762-78. doi:  
464 10.1093/humupd/dmv039
- 465 2. Yonkers KA, Simoni MK. Premenstrual disorders. *Am J Obstet Gynecol*  
466 2018;218(1):68-74. doi: 10.1016/j.ajog.2017.05.045
- 467 3. Shapley M, Jordan K, Croft PR. An epidemiological survey of symptoms of  
468 menstrual loss in the community. *The British journal of general practice : the*  
469 *journal of the Royal College of General Practitioners* 2004;54(502):359-63.  
470 [published Online First: 2004/04/29]
- 471 4. Liu Z, Doan QV, Blumenthal P, et al. A systematic review evaluating health-related  
472 quality of life, work impairment, and health-care costs and utilization in  
473 abnormal uterine bleeding. *Value Health* 2007;10(3):183-94. doi:  
474 10.1111/j.1524-4733.2007.00168.x
- 475 5. Rapkin AJ, Winer SA. Premenstrual syndrome and premenstrual dysphoric  
476 disorder: quality of life and burden of illness. *Expert review of*  
477 *pharmacoeconomics & outcomes research* 2009;9(2):157-70. doi:  
478 10.1586/erp.09.14 [published Online First: 2009/05/01]
- 479 6. Knox B, Azurah AG, Grover SR. Quality of life and menstruation in adolescents.  
480 *Curr Opin Obstet Gynecol* 2015;27(5):309-14. doi:  
481 10.1097/GCO.000000000000199
- 482 7. Peuranpaa P, Heliovaara-Peippo S, Fraser I, et al. Effects of anemia and iron  
483 deficiency on quality of life in women with heavy menstrual bleeding. *Acta*  
484 *Obstet Gynecol Scand* 2014;93(7):654-60. doi: 10.1111/aogs.12394

- 1  
2  
3 485 8. Jensen JT, Lefebvre P, Laliberte F, et al. Cost burden and treatment patterns  
4  
5 486 associated with management of heavy menstrual bleeding. *J Womens Health*  
6  
7 487 (*Larchmt*) 2012;21(5):539-47. doi: 10.1089/jwh.2011.3147  
8  
9  
10 488 9. Fourquet J, Baez L, Figueroa M, et al. Quantification of the impact of  
11  
12 489 endometriosis symptoms on health-related quality of life and work productivity.  
13  
14 490 *Fertil Steril* 2011;96(1):107-12. doi: 10.1016/j.fertnstert.2011.04.095  
15  
16  
17 491 10. Klein S, D'Hooghe T, Meuleman C, et al. What is the societal burden of  
18  
19 492 endometriosis-associated symptoms? a prospective Belgian study. *Reprod*  
20  
21 493 *Biomed Online* 2014;28(1):116-24. doi: 10.1016/j.rbmo.2013.09.020  
22  
23  
24 494 11. Heinemann LA, Minh TD, Filonenko A, et al. Explorative evaluation of the impact  
25  
26 495 of severe premenstrual disorders on work absenteeism and productivity.  
27  
28 496 *Women's health issues : official publication of the Jacobs Institute of Women's*  
29  
30 497 *Health* 2010;20(1):58-65. doi: 10.1016/j.whi.2009.09.005 [published Online  
31  
32 First: 2010/02/04]  
33  
34  
35 499 12. Frick KD, Clark MA, Steinwachs DM, et al. Financial and quality-of-life burden of  
36  
37 500 dysfunctional uterine bleeding among women agreeing to obtain surgical  
38  
39 501 treatment. *Women's health issues : official publication of the Jacobs Institute*  
40  
41 502 *of Women's Health* 2009;19(1):70-8. doi: 10.1016/j.whi.2008.07.002  
42  
43  
44 503 13. Krol M, Brouwer W, Rutten F. Productivity costs in economic evaluations: past,  
45  
46 504 present, future. *Pharmacoeconomics* 2013;31(7):537-49. doi: 10.1007/s40273-  
47  
48 505 013-0056-3  
49  
50  
51 506 14. Soliman AM, Coyne KS, Gries KS, et al. The Effect of Endometriosis Symptoms  
52  
53 507 on Absenteeism and Presenteeism in the Workplace and at Home. *Journal of*  
54  
55 508 *managed care & specialty pharmacy* 2017;23(7):745-54. doi:  
56  
57 509 10.18553/jmcp.2017.23.7.745 [published Online First: 2017/06/27]  
58  
59  
60

- 1  
2  
3 510 15. Wong LP. Attitudes towards dysmenorrhoea, impact and treatment seeking  
4  
5 511 among adolescent girls: a rural school-based survey. *Aust J Rural Health*  
6  
7 512 2011;19(4):218-23. doi: 10.1111/j.1440-1584.2011.01213.x  
8  
9  
10 513 16. De Sanctis V, Soliman AT, Elsedfy H, et al. Dysmenorrhea in adolescents and  
11  
12 514 young adults: a review in different countries. *Acta bio-medica : Atenei*  
13  
14 515 *Parmensis* 2017;87(3):233-46. [published Online First: 2017/01/24]  
15  
16  
17 516 17. Sharp BAC, Taylor DL, Thomas KK, et al. Cyclic Perimenstrual Pain and  
18  
19 517 Discomfort: The Scientific Basis for Practice. *Journal of Obstetric, Gynecologic*  
20  
21 518 *& Neonatal Nursing* 2002;31(6):637-49. doi: 10.1177/0884217502239207  
22  
23  
24 519 18. Monagle L, Dan A, Krogh V, et al. Perimenstrual symptom prevalence rates: an  
25  
26 520 Italian-American comparison. *American journal of epidemiology*  
27  
28 521 1993;138(12):1070-81. [published Online First: 1993/12/15]  
29  
30  
31 522 19. Bouwmans C, Krol M, Severens H, et al. The iMTA Productivity Cost  
32  
33 523 Questionnaire: A Standardized Instrument for Measuring and Valuing Health-  
34  
35 524 Related Productivity Losses. *Value Health* 2015;18(6):753-8. doi:  
36  
37 525 10.1016/j.jval.2015.05.009  
38  
39  
40 526 20. SurveyMonkey. SurveyMonkey, software for online surveys 2018 [Available from:  
41  
42 527 <http://www.surveymonkey.net>.  
43  
44  
45 528 21. Bodian CA, Freedman G, Hossain S, et al. The visual analog scale for pain:  
46  
47 529 clinical significance in postoperative patients. *Anesthesiology*  
48  
49 530 2001;95(6):1356-61. [published Online First: 2001/12/19]  
50  
51  
52 531 22. Serlin RC, Mendoza TR, Nakamura Y, et al. When is cancer pain mild, moderate  
53  
54 532 or severe? Grading pain severity by its interference with function. *Pain*  
55  
56 533 1995;61(2):277-84. [published Online First: 1995/05/01]  
57  
58  
59 534 23. UNESCO Institute for Statistics U. International Standard Classification of  
60  
535 Education ISCED 2011, 2012.

- 1  
2  
3 536 24. Dutch Healthcare Institution (Zorginstituut Nederland) D. Guideline for the  
4  
5 537 execution of economic evaluations in healthcare. (Richtlijn voor het uitvoeren  
6  
7 538 van economische evaluaties in de gezondheidszorg). 2016.  
9  
10 539 <https://www.zorginstituutnederland.nl/publicaties/publicatie/2016/02/29/richtlijn>  
11  
12 540 [-voor-het-uitvoeren-van-economische-evaluaties-in-de-gezondheidszorg](https://www.zorginstituutnederland.nl/publicaties/publicatie/2016/02/29/richtlijn-voor-het-uitvoeren-van-economische-evaluaties-in-de-gezondheidszorg).  
13  
14 541 25. Tanaka E, Momoeda M, Osuga Y, et al. Burden of menstrual symptoms in  
15  
16 542 Japanese women: results from a survey-based study. *Journal of medical*  
17  
18 543 *economics* 2013;16(11):1255-66. doi: 10.3111/13696998.2013.830974  
19  
20 544 [published Online First: 2013/09/11]  
21  
22  
23 545 26. Nakata K, Tsuji T, Vietri J, et al. Work impairment, osteoarthritis, and health-  
24  
25 546 related quality of life among employees in Japan. *Health and quality of life*  
26  
27 547 *outcomes* 2018;16(1):64. doi: 10.1186/s12955-018-0896-9 [published Online  
28  
29 548 First: 2018/04/19]  
30  
31  
32 549 27. Matsudaira K, Palmer KT, Reading I, et al. Prevalence and correlates of regional  
33  
34 550 pain and associated disability in Japanese workers. *Occupational and*  
35  
36 551 *environmental medicine* 2011;68(3):191-6. doi: 10.1136/oem.2009.053645  
37  
38 552 [published Online First: 2010/09/14]  
39  
40  
41 553 28. Hailemeskel S, Demissie A, Assefa N. Primary dysmenorrhea magnitude,  
42  
43 554 associated risk factors, and its effect on academic performance: evidence from  
44  
45 555 female university students in Ethiopia. *International journal of women's health*  
46  
47 556 2016;8:489-96. doi: 10.2147/ijwh.s112768 [published Online First: 2016/10/04]  
48  
49  
50 557 29. Banikarim C, Chacko MR, Kelder SH. Prevalence and impact of dysmenorrhea  
51  
52 558 on Hispanic female adolescents. *Archives of pediatrics & adolescent medicine*  
53  
54 559 2000;154(12):1226-9. [published Online First: 2000/12/15]  
55  
56  
57  
58  
59  
60

- 1  
2  
3 560 30. Nnoaham KE, Hummelshoj L, Webster P, et al. Impact of endometriosis on  
4  
5 561 quality of life and work productivity: a multicenter study across ten countries.  
6  
7 562 *Fertil Steril* 2011;96(2):366-73 e8. doi: 10.1016/j.fertnstert.2011.05.090  
8  
9  
10 563 31. Busch K, da Silva SA, Holton M, et al. Sick leave and disability pension in  
11  
12 564 inflammatory bowel disease: a systematic review. *Journal of Crohn's & colitis*  
13  
14 565 2014;8(11):1362-77. doi: 10.1016/j.crohns.2014.06.006 [published Online  
15  
16 566 First: 2014/07/09]  
17  
18  
19 567 32. Cash B, Sullivan S, Barghout V. Total costs of IBS: employer and managed care  
20  
21 568 perspective. *The American journal of managed care* 2005;11(1 Suppl):S7-16.  
22  
23 569 [published Online First: 2005/06/02]  
24  
25  
26 570 33. George R. Bad blood: the taboo on talking about periods is damaging lives *The*  
27  
28 571 *Guardian* 2016  
29  
30  
31 572 34. Aufrichtig A. Period pain: why do so many women suffer from menstrual cramps  
32  
33 573 in silence? . *The Guardian* 2016  
34  
35 574 35. Betts H. The P Word: A last taboo. *The Telegraph* 2013  
36  
37  
38 575 36. Central Bureau of Statistics C. Statline - Active workforce; duration of labour.  
39  
40 576 (Werkzame beroepsbevolking; arbeidsduur), 2018.  
41  
42 577 37. Central Bureau of Statistics C. Statline - Sick leave according to employees;  
43  
44 578 gender and age. (Ziekteverzuim volgens werknemers; geslacht en leeftijd),  
45  
46 579 2017.  
47  
48  
49 580 38. Robinson LL, Ismail KM. Clinical epidemiology of premenstrual disorder:  
50  
51 581 informing optimized patient outcomes. *International journal of women's health*  
52  
53 582 2015;7:811-8. doi: 10.2147/IJWH.S48426  
54  
55  
56 583 39. Giudice LC, Kao LC. Endometriosis. *The Lancet* 2004;364(9447):1789-99. doi:  
57  
58 584 10.1016/s0140-6736(04)17403-5  
59  
60

- 1  
2  
3 585 40. Central Bureau of Statistics C. Statline - People attending the general  
4  
5 586 practitioner; diagnosis, age, gender. (Personen naar bij de huisarts bekende  
6  
7 587 diagnose; leeftijd, geslacht), 2016.  
8  
9  
10 588 41. Central Bureau of Statistics C. Statline - Social monitor, prosperity and well-being  
11  
12 589 in the Dutch society. (Sociale Monitor, welvaart en welzijn in de Nederlandse  
13  
14 590 samenleving), 2018.  
15  
16  
17 591 42. Whitaker C, Stevelink S, Fear N. The Use of Facebook in Recruiting Participants  
18  
19 592 for Health Research Purposes: A Systematic Review. *J Med Internet Res*  
20  
21 593 2017;19(8):e290. doi: 10.2196/jmir.7071  
22  
23  
24 594 43. Severens JL, Mulder J, Laheij RJ, et al. Precision and accuracy in measuring  
25  
26 595 absence from work as a basis for calculating productivity costs in The  
27  
28 596 Netherlands. *Social science & medicine (1982)* 2000;51(2):243-9. [published  
29  
30 597 Online First: 2000/06/01]  
31  
32  
33 598 44. Bouwmans C, De Jong K, Timman R, et al. Feasibility, reliability and validity of a  
34  
35 599 questionnaire on healthcare consumption and productivity loss in patients with  
36  
37 600 a psychiatric disorder (TiC-P). *BMC health services research* 2013;13:217.  
38  
39 601 doi: 10.1186/1472-6963-13-217 [published Online First: 2013/06/19]  
40  
41  
42 602 45. Janda C, Kues JN, Andersson G, et al. A symptom diary to assess severe  
43  
44 603 premenstrual syndrome and premenstrual dysphoric disorder. *Women &*  
45  
46 604 *health* 2017;57(7):837-54. doi: 10.1080/03630242.2016.1206055 [published  
47  
48 605 Online First: 2016/06/30]  
49  
50  
51 606 46. O'Brien PMS, Bäckström T, Brown C, et al. Towards a consensus on diagnostic  
52  
53 607 criteria, measurement and trial design of the premenstrual disorders: the  
54  
55 608 ISPMD Montreal consensus. *Archives of Women's Mental Health*  
56  
57 609 2011;14(1):13-21. doi: 10.1007/s00737-010-0201-3  
58  
59  
60

- 1  
2  
3 610 47. Lee AM, So-Kum Tang C, Chong C. A culturally sensitive study of premenstrual  
4  
5 611 and menstrual symptoms among Chinese women. *J Psychosom Obstet*  
6  
7 612 *Gynaecol* 2009;30(2):105-14. doi: 10.1080/01674820902789241  
8  
9  
10  
11 613  
12  
13  
14  
15  
16  
17  
18  
19  
20  
21  
22  
23  
24  
25  
26  
27  
28  
29  
30  
31  
32  
33  
34  
35  
36  
37  
38  
39  
40  
41  
42  
43  
44  
45  
46  
47  
48  
49  
50  
51  
52  
53  
54  
55  
56  
57  
58  
59  
60

For peer review only



1  
2  
3 614 **Funding statement**  
4  
5

6 615 This research received no specific grant from any funding agency in the public,  
7  
8 616 commercial or not-for-profit sectors.  
9

10  
11 617  
12  
13

14  
15 618 **Competing interest statement**  
16

17  
18 619 All authors have completed the ICMJE uniform disclosure form at  
19  
20 620 [www.icmje.org/coi\\_disclosure.pdf](http://www.icmje.org/coi_disclosure.pdf) and declare: no support from any organisation for  
21  
22 621 the submitted work; no financial relationships with any organisations that might have  
23  
24 622 an interest in the submitted work in the previous three years; no other relationships or  
25  
26 623 activities that could appear to have influenced the submitted work.  
27  
28  
29

30 624  
31  
32

33 625 **Contributorship statement**  
34

35  
36 626 TN, BD and JA conceived the study. MS wrote the first and successive drafts of the  
37  
38 627 manuscript. MS, TN and EA modelled and analysed the data. TN, EA, JM, BD and  
39  
40 628 JA contributed to study conception and design. MS and TN collected the data. All  
41  
42 629 authors revised the manuscript for important intellectual content. MS and TN had full  
43  
44 630 access to the data and take responsibility for the integrity of the data and the  
45  
46 631 accuracy of the data analysis. TN is the guarantor.  
47  
48  
49

50  
51 632  
52  
53

54 633 **Data sharing statement**  
55

56  
57 634 No additional data from this study are available from a repository. Data are available  
58  
59 635 on request from the corresponding author.  
60

1  
2  
3 636 **Acknowledgements**  
4  
5

6 637 The authors would like to thank Reinoud Oomen, Peter de Vroed, Steven Giesbers,  
7  
8 638 Elsbeth Teeling, Paula Kragten and Annemarie Haverkamp for their valuable  
9  
10 639 contributions in the development and dispersion of the questionnaire.  
11  
12  
13

14 640  
15  
16  
17  
18  
19  
20  
21  
22  
23  
24  
25  
26  
27  
28  
29  
30  
31  
32  
33  
34  
35  
36  
37  
38  
39  
40  
41  
42  
43  
44  
45  
46  
47  
48  
49  
50  
51  
52  
53  
54  
55  
56  
57  
58  
59  
60

For peer review only

1  
2  
3 641 **Legends to figures**  
4  
5

6 642  
7  
8

9 643 *Figure 1*  
10  
11

12 644 Flow chart for the respondents.  
13  
14

15 645  
16  
17

18 646 *Figure 2*  
19  
20

21 647 The relationship between pain and intensity scores, related to absenteeism and  
22  
23 648 presenteeism, in lost days per year.  
24  
25

26 649  
27  
28

29 650 *Figure 3*  
30  
31

32 651 The relationship between age and average absenteeism and presenteeism.  
33  
34  
35  
36  
37  
38  
39  
40  
41  
42  
43  
44  
45  
46  
47  
48  
49  
50  
51  
52  
53  
54  
55  
56  
57  
58  
59  
60

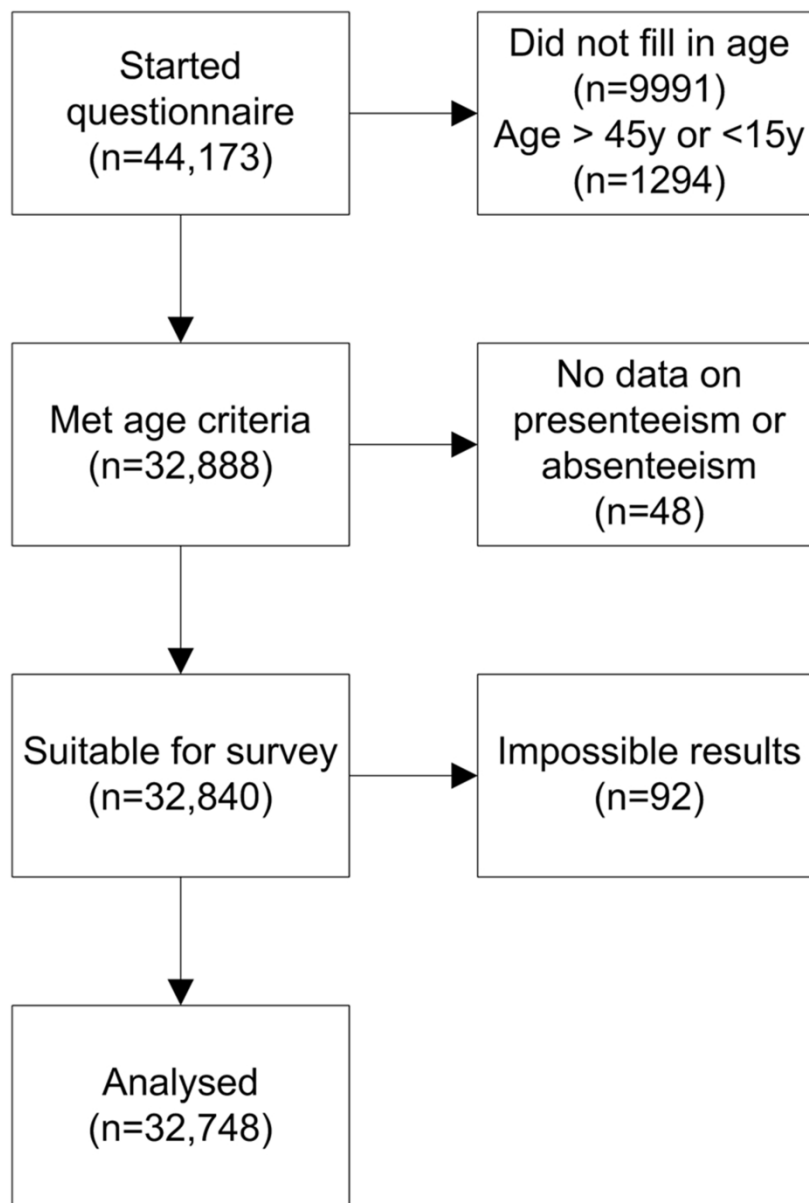

Flow chart for the respondents.

287x423mm (300 x 300 DPI)

1  
2  
3  
4  
5  
6  
7  
8  
9  
10  
11  
12  
13  
14  
15  
16  
17  
18  
19  
20  
21  
22  
23  
24  
25  
26  
27  
28  
29  
30  
31  
32  
33  
34  
35  
36  
37  
38  
39  
40  
41  
42  
43  
44  
45  
46  
47  
48  
49  
50  
51  
52  
53  
54  
55  
56  
57  
58  
59  
60



The relationship between pain and intensity scores, related to absenteeism and presenteeism, in lost days per year.

202x209mm (300 x 300 DPI)



The relationship between age and average absenteeism and presenteeism.

206x199mm (300 x 300 DPI)

## Appendix

### Summary of the questionnaire

#### *Part 1: Questions about basic characteristics*

- Age, marital status, nationality, level of education
- Work, voluntary work and study: hours per week, sector, experienced stress
- Smoking
- Menstrual cycle: total length, number of days with blood loss, number of times needing to change pad or tampon
- Medical and obstetric history
- Contraception use

#### *Part 2: General questions about menstruation-related symptoms*

- Symptoms: abdominal pain, heavy menstrual blood loss, headache, fatigue, backache, nausea and vomiting, tender breasts, problems with stool, psychological complaints
- Per symptom: number of days the symptom was present; number of days that the symptom influenced daily functioning; the magnitude of the symptom's influence on daily functioning; pain or intensity score (not for heavy menstrual bleeding, nausea and vomiting); continuation of daily activities despite symptoms; and the extent to which women forced themselves to continue their daily activities
- Usage of over-the-counter drugs, narcotics, painkillers, alternative medicine

1  
2  
3 *Part 3: Questions related to absenteeism and presenteeism (full text)*  
4  
5

- 6  
7 - How often did you call in sick due to menstrual complaints in the past six months?  
8  
9     ○ Every menstrual cycle  
10  
11     ○ Almost every menstrual cycle  
12  
13     ○ Half of all menstrual cycles  
14  
15     ○ Sometimes  
16  
17     ○ Never  
18  
19  
20  
21  
22  
23 - What is the mean number of days you called in sick due to menstruation-related  
24 symptoms per cycle in the past six months?  
25  
26     ○ More than three days  
27  
28     ○ Three days  
29  
30     ○ Two days  
31  
32     ○ One day  
33  
34     ○ Half a day or a few hours  
35  
36  
37  
38  
39  
40  
41  
42  
43 - What is the number of days you were present at work while being hindered by  
44 menstrual complaints?  
45  
46  
47  
48  
49  
50 - How was your performance during these days?  
51  
52     ○ A Visual Analog Scale by means of sliding a bar was used to score the amount  
53 of productivity loss, where the left end said “I could not do anything” and the  
54 right end said “I could do just as much as I normally do”.  
55  
56  
57  
58  
59  
60



- 1  
2  
3  
4  
5  
6  
7  
8  
9  
10  
11  
12  
13  
14  
15  
16  
17  
18  
19  
20  
21  
22  
23  
24  
25  
26  
27  
28  
29  
30  
31  
32  
33  
34  
35  
36  
37  
38  
39  
40  
41  
42  
43  
44  
45  
46  
47  
48  
49  
50  
51  
52  
53  
54  
55  
56  
57  
58  
59  
60
- What was the number of days you called in sick because of non-menstruation-related symptoms in the past six months?
  
  - What reason do you give when you call in sick due to menstruation-related symptoms?
    - Menstrual complaints
    - Only the presenting symptom, for example abdominal pain or headache
    - You do not give a reason
    - You think up another reason
  
  - What measures would be desirable for women on the workplace or at school during their menstrual period? It is possible to give more than one answer.
    - A day off without any consequences
    - A day off to catch up later
    - Flexibility to perform less physical work
    - More time for personal care
    - The possibility to work from home
    - None
    - Not applicable

**STROBE 2007 (v4) Statement—Checklist of items that should be included in reports of *cross-sectional studies***

| Section/Topic                | Item # | Recommendation                                                                                                                                                                       | Reported on page # |
|------------------------------|--------|--------------------------------------------------------------------------------------------------------------------------------------------------------------------------------------|--------------------|
| Title and abstract           | 1      | (a) Indicate the study's design with a commonly used term in the title or the abstract                                                                                               | 2                  |
|                              |        | (b) Provide in the abstract an informative and balanced summary of what was done and what was found                                                                                  | 2                  |
| <b>Introduction</b>          |        |                                                                                                                                                                                      |                    |
| Background/rationale         | 2      | Explain the scientific background and rationale for the investigation being reported                                                                                                 | 4                  |
| Objectives                   | 3      | State specific objectives, including any prespecified hypotheses                                                                                                                     | 5                  |
| <b>Methods</b>               |        |                                                                                                                                                                                      |                    |
| Study design                 | 4      | Present key elements of study design early in the paper                                                                                                                              | 5                  |
| Setting                      | 5      | Describe the setting, locations, and relevant dates, including periods of recruitment, exposure, follow-up, and data collection                                                      | 5-7                |
| Participants                 | 6      | (a) Give the eligibility criteria, and the sources and methods of selection of participants                                                                                          | 6                  |
| Variables                    | 7      | Clearly define all outcomes, exposures, predictors, potential confounders, and effect modifiers. Give diagnostic criteria, if applicable                                             | 8, appendix        |
| Data sources/<br>measurement | 8*     | For each variable of interest, give sources of data and details of methods of assessment (measurement). Describe comparability of assessment methods if there is more than one group | 7-8                |
| Bias                         | 9      | Describe any efforts to address potential sources of bias                                                                                                                            | 7-9                |
| Study size                   | 10     | Explain how the study size was arrived at                                                                                                                                            | 7                  |
| Quantitative variables       | 11     | Explain how quantitative variables were handled in the analyses. If applicable, describe which groupings were chosen and why                                                         | 7-9                |
| Statistical methods          | 12     | (a) Describe all statistical methods, including those used to control for confounding                                                                                                | 7-8                |
|                              |        | (b) Describe any methods used to examine subgroups and interactions                                                                                                                  | 7-8                |
|                              |        | (c) Explain how missing data were addressed                                                                                                                                          | 7,9                |
|                              |        | (d) If applicable, describe analytical methods taking account of sampling strategy                                                                                                   | n/a                |
|                              |        | (e) Describe any sensitivity analyses                                                                                                                                                | n/a                |
| <b>Results</b>               |        |                                                                                                                                                                                      |                    |

|                          |     |                                                                                                                                                                                                              |                                             |
|--------------------------|-----|--------------------------------------------------------------------------------------------------------------------------------------------------------------------------------------------------------------|---------------------------------------------|
| Participants             | 13* | (a) Report numbers of individuals at each stage of study—eg numbers potentially eligible, examined for eligibility, confirmed eligible, included in the study, completing follow-up, and analysed            | 9                                           |
|                          |     | (b) Give reasons for non-participation at each stage                                                                                                                                                         | 9/Figure 1                                  |
|                          |     | (c) Consider use of a flow diagram                                                                                                                                                                           | Figure 1                                    |
| Descriptive data         | 14* | (a) Give characteristics of study participants (eg demographic, clinical, social) and information on exposures and potential confounders                                                                     | 9/Table 1                                   |
|                          |     | (b) Indicate number of participants with missing data for each variable of interest                                                                                                                          | Not reported, can be reported if desirable. |
| Outcome data             | 15* | Report numbers of outcome events or summary measures                                                                                                                                                         | 9-11/Table 2,3                              |
| Main results             | 16  | (a) Give unadjusted estimates and, if applicable, confounder-adjusted estimates and their precision (eg, 95% confidence interval). Make clear which confounders were adjusted for and why they were included | Table 4                                     |
|                          |     | (b) Report category boundaries when continuous variables were categorized                                                                                                                                    | Table 1,4                                   |
|                          |     | (c) If relevant, consider translating estimates of relative risk into absolute risk for a meaningful time period                                                                                             | n/a                                         |
| Other analyses           | 17  | Report other analyses done—eg analyses of subgroups and interactions, and sensitivity analyses                                                                                                               | n/a                                         |
| <b>Discussion</b>        |     |                                                                                                                                                                                                              |                                             |
| Key results              | 18  | Summarise key results with reference to study objectives                                                                                                                                                     | 11-12                                       |
| Limitations              | 19  | Discuss limitations of the study, taking into account sources of potential bias or imprecision. Discuss both direction and magnitude of any potential bias                                                   | 14-15                                       |
| Interpretation           | 20  | Give a cautious overall interpretation of results considering objectives, limitations, multiplicity of analyses, results from similar studies, and other relevant evidence                                   | 12-15                                       |
| Generalisability         | 21  | Discuss the generalisability (external validity) of the study results                                                                                                                                        | 14-15                                       |
| <b>Other information</b> |     |                                                                                                                                                                                                              |                                             |
| Funding                  | 22  | Give the source of funding and the role of the funders for the present study and, if applicable, for the original study on which the present article is based                                                | n/a                                         |

\*Give information separately for cases and controls in case-control studies and, if applicable, for exposed and unexposed groups in cohort and cross-sectional studies.

**Note:** An Explanation and Elaboration article discusses each checklist item and gives methodological background and published examples of transparent reporting. The STROBE checklist is best used in conjunction with this article (freely available on the Web sites of PLoS Medicine at <http://www.plosmedicine.org/>, Annals of Internal Medicine at <http://www.annals.org/>, and Epidemiology at <http://www.epidem.com/>). Information on the STROBE Initiative is available at [www.strobe-statement.org](http://www.strobe-statement.org).
